# Supplementary material for: Computational Predictions Provide Insights into the Biology of TAL Effector Target Sites
Source: PubMed Central journal article supplement (PMC3597551; doi:10.1371/journal.pcbi.1002962), 2013-03-14
Supplement: pcbi.1002962.s012.pdf [file pcbi.1002962.s012.pdf]

## Supplementary Text S1

### Priors and hyper-parameters

We denote as  $Di(\boldsymbol{\theta}|\boldsymbol{\alpha})$  the Dirichlet prior on parameters  $\boldsymbol{\theta}$  given hyper-parameters  $\boldsymbol{\alpha}$ . The complete product-Dirichlet prior is defined as

$$Di(\boldsymbol{\theta}|\boldsymbol{\alpha}) = Di(\boldsymbol{\theta}_0|\boldsymbol{\alpha}_0) \left[ \prod_{y \in \mathcal{R}} Di(\boldsymbol{\theta}_{M,y}|\boldsymbol{\alpha}_{M,y}) Di(\boldsymbol{\theta}_{D,y}|\boldsymbol{\alpha}_{D,y}) \right] \\ Di(\boldsymbol{\theta}_{I,0}|\boldsymbol{\alpha}_{I,0}) \prod_{x \in \mathcal{A}} Di(\boldsymbol{\theta}_{I,1,x}|\boldsymbol{\alpha}_{I,1,x}) \prod_{\mathbf{c} \in \mathcal{A}^2} Di(\boldsymbol{\theta}_{I,\mathbf{c}}|\boldsymbol{\alpha}_{I,\mathbf{c}}),$$

where  $\boldsymbol{\theta}_{M,y}$  denotes the parameters of  $P_M$  given RVD  $y$ ,  $\boldsymbol{\theta}_{D,y}$  denotes the parameters of  $P_D$  given RVD  $y$ ,  $\boldsymbol{\theta}_{I,0}$  denotes the parameters of  $P_I$  without context,  $\boldsymbol{\theta}_{I,1,x}$  denotes the parameters of  $P_I$  with a context  $x$  of length 1,  $\boldsymbol{\theta}_{I,\mathbf{c}}$  denotes the parameters of  $P_I$  for the full context  $\mathbf{c}$  of length 2. The corresponding hyper-parameters are denoted accordingly.

In the implementation, we use natural parameters as defined in [1]. For these parameters, we use a product-Dirichlet prior that is transformed to the natural parameterization as presented in [2].

We define the hyper-parameters according to the consistency conditions necessary for the prior being Bayesian-Dirichlet likelihood equivalent [3, 4] using an equivalent sample size of 16.

$Di(\boldsymbol{\theta}_0|\boldsymbol{\alpha}_0)$

| A   | C   | G   | T   |
|-----|-----|-----|-----|
| 1.6 | 3.2 | 1.6 | 9.6 |

$$Di(\boldsymbol{\theta}_{M,y} | \boldsymbol{\alpha}_{M,y})$$

| $y$ | $\alpha_{M,y,D}$ | $\alpha_{M,y,I}$ |
|-----|------------------|------------------|
| NI  | 2.954            | 6.892            |
| NG  | 2.954            | 6.892            |
| NN  | 8.862            | 0.985            |
| NS  | 6.892            | 2.954            |
| N*  | 2.954            | 6.892            |
| ND  | 4.923            | 4.923            |
| NK  | 2.954            | 6.892            |
| NC  | 4.923            | 4.923            |
| NV  | 4.923            | 4.923            |
| NA  | 4.923            | 4.923            |
| NH  | 6.892            | 2.954            |
| HD  | 8.862            | 0.985            |
| HG  | 4.923            | 4.923            |
| HA  | 4.923            | 4.923            |
| H*  | 4.923            | 4.923            |
| HH  | 4.923            | 4.923            |
| HI  | 4.923            | 4.923            |
| HN  | 6.892            | 2.954            |
| S*  | 4.923            | 4.923            |
| SN  | 2.954            | 6.892            |
| SS  | 4.923            | 4.923            |
| IG  | 4.923            | 4.923            |
| YG  | 4.923            | 4.923            |
| NP  | 6.892            | 2.954            |
| NT  | 6.892            | 2.954            |
| IS  | 2.954            | 6.892            |

$$Di(\boldsymbol{\theta}_{D,y}|\boldsymbol{\alpha}_{D,y})$$

| $y$ | A     | C     | G     | T     |
|-----|-------|-------|-------|-------|
| NI  | 2.068 | 0.295 | 0.295 | 0.295 |
| NG  | 0.295 | 0.295 | 0.295 | 2.068 |
| NN  | 2.658 | 0.886 | 4.431 | 0.886 |
| NS  | 2.412 | 1.378 | 2.412 | 0.689 |
| N*  | 0.295 | 0.295 | 0.295 | 2.068 |
| ND  | 0.492 | 3.446 | 0.492 | 0.492 |
| NK  | 0.295 | 0.295 | 2.068 | 0.295 |
| NC  | 1.231 | 1.231 | 1.231 | 1.231 |
| NV  | 1.231 | 1.231 | 1.231 | 1.231 |
| NA  | 0.492 | 0.492 | 3.446 | 0.492 |
| NH  | 0.689 | 0.689 | 4.825 | 0.689 |
| HD  | 0.886 | 6.203 | 0.886 | 0.886 |
| HG  | 0.492 | 0.492 | 0.492 | 3.446 |
| HA  | 0.985 | 2.462 | 0.985 | 0.492 |
| H*  | 0.492 | 0.492 | 0.492 | 3.446 |
| HH  | 1.231 | 1.231 | 1.231 | 1.231 |
| HI  | 0.492 | 3.446 | 0.492 | 0.492 |
| HN  | 2.068 | 0.689 | 3.446 | 0.689 |
| S*  | 1.231 | 1.231 | 1.231 | 1.231 |
| SN  | 0.295 | 0.295 | 2.068 | 0.295 |
| SS  | 1.231 | 1.231 | 1.231 | 1.231 |
| IG  | 0.492 | 0.492 | 0.492 | 3.446 |
| YG  | 1.231 | 1.231 | 1.231 | 1.231 |
| NP  | 1.378 | 1.378 | 0.689 | 3.446 |
| NT  | 2.068 | 0.689 | 3.446 | 0.689 |
| IS  | 0.738 | 0.738 | 0.738 | 0.738 |

$$Di(\boldsymbol{\theta}_{I,0}|\boldsymbol{\alpha}_{I,0})$$

| A     | C     | G     | T     |
|-------|-------|-------|-------|
| 1.908 | 1.908 | 1.908 | 1.908 |

$$Di(\boldsymbol{\theta}_{I,1,x}|\boldsymbol{\alpha}_{I,1,x})$$

| $x$ | A     | C     | G     | T     |
|-----|-------|-------|-------|-------|
| A   | 0.477 | 0.477 | 0.477 | 0.477 |
| C   | 0.477 | 0.477 | 0.477 | 0.477 |
| G   | 0.477 | 0.477 | 0.477 | 0.477 |
| T   | 0.477 | 0.477 | 0.477 | 0.477 |

$$Di(\boldsymbol{\theta}_{I,c}|\boldsymbol{\alpha}_{I,c})$$

| $c$ | A     | C     | G     | T     |
|-----|-------|-------|-------|-------|
| AA  | 1.669 | 1.669 | 1.669 | 1.669 |
| AC  | 1.669 | 1.669 | 1.669 | 1.669 |
| AG  | 1.669 | 1.669 | 1.669 | 1.669 |
| AT  | 1.669 | 1.669 | 1.669 | 1.669 |
| CA  | 1.669 | 1.669 | 1.669 | 1.669 |
| CC  | 1.669 | 1.669 | 1.669 | 1.669 |
| CG  | 1.669 | 1.669 | 1.669 | 1.669 |
| CT  | 1.669 | 1.669 | 1.669 | 1.669 |
| GA  | 1.669 | 1.669 | 1.669 | 1.669 |
| GC  | 1.669 | 1.669 | 1.669 | 1.669 |
| GG  | 1.669 | 1.669 | 1.669 | 1.669 |
| GT  | 1.669 | 1.669 | 1.669 | 1.669 |
| TA  | 1.669 | 1.669 | 1.669 | 1.669 |
| TC  | 1.669 | 1.669 | 1.669 | 1.669 |
| TG  | 1.669 | 1.669 | 1.669 | 1.669 |
| TT  | 1.669 | 1.669 | 1.669 | 1.669 |

**Estimated parameters of TALgetter**

$$P(x_0|\boldsymbol{\theta}_0)$$

| A     | C     | G     | T     |
|-------|-------|-------|-------|
| 0.049 | 0.100 | 0.022 | 0.829 |

$$P(U_\ell = D|y_\ell, \boldsymbol{\theta}_M)$$

| $y_\ell$ | $P(U_\ell = D y_\ell, \boldsymbol{\theta}_M)$ |
|----------|-----------------------------------------------|
| NI       | 0.850                                         |
| NG       | 0.820                                         |
| NN       | 0.934                                         |
| NS       | 0.832                                         |
| N*       | 0.615                                         |
| ND       | 0.500                                         |
| NK       | 0.587                                         |
| NC       | 0.500                                         |
| NV       | 0.500                                         |
| NA       | 0.500                                         |
| NH       | 0.837                                         |
| HD       | 0.977                                         |
| HG       | 0.703                                         |
| HA       | 0.500                                         |
| H*       | 0.544                                         |
| HH       | 0.500                                         |
| HI       | 0.500                                         |
| HN       | 0.766                                         |
| S*       | 0.500                                         |
| SN       | 0.363                                         |
| SS       | 0.500                                         |
| IG       | 0.547                                         |
| YG       | 0.500                                         |
| NP       | 0.716                                         |
| NT       | 0.752                                         |
| IS       | 0.300                                         |

$P_D(x_\ell|y_\ell, \theta_D)$ 

| $y_\ell$ | A     | C     | G     | T     |
|----------|-------|-------|-------|-------|
| NI       | 0.904 | 0.087 | 0.005 | 0.003 |
| NG       | 0.005 | 0.065 | 0.003 | 0.926 |
| NN       | 0.171 | 0.124 | 0.675 | 0.030 |
| NS       | 0.662 | 0.210 | 0.103 | 0.025 |
| N*       | 0.015 | 0.693 | 0.019 | 0.272 |
| ND       | 0.100 | 0.700 | 0.100 | 0.100 |
| NK       | 0.026 | 0.024 | 0.926 | 0.025 |
| NC       | 0.250 | 0.250 | 0.250 | 0.250 |
| NV       | 0.250 | 0.250 | 0.250 | 0.250 |
| NA       | 0.100 | 0.100 | 0.700 | 0.100 |
| NH       | 0.038 | 0.039 | 0.885 | 0.038 |
| HD       | 0.084 | 0.884 | 0.006 | 0.026 |
| HG       | 0.027 | 0.128 | 0.027 | 0.819 |
| HA       | 0.200 | 0.500 | 0.200 | 0.100 |
| H*       | 0.076 | 0.076 | 0.076 | 0.771 |
| HH       | 0.250 | 0.250 | 0.250 | 0.250 |
| HI       | 0.100 | 0.700 | 0.100 | 0.100 |
| HN       | 0.210 | 0.058 | 0.675 | 0.057 |
| S*       | 0.250 | 0.250 | 0.250 | 0.250 |
| SN       | 0.069 | 0.067 | 0.805 | 0.059 |
| SS       | 0.250 | 0.250 | 0.250 | 0.250 |
| IG       | 0.076 | 0.076 | 0.076 | 0.773 |
| YG       | 0.250 | 0.250 | 0.250 | 0.250 |
| NP       | 0.161 | 0.177 | 0.062 | 0.600 |
| NT       | 0.257 | 0.059 | 0.625 | 0.059 |
| IS       | 0.250 | 0.250 | 0.250 | 0.250 |

 $P_I(x_0|\theta_I)$ 

After the optimization, the estimated parameters are replaced with the parameters of the stationary distribution of  $P_I(x_\ell|x_{\ell-2}, x_{\ell-1}, \theta_I)$ , which are listed in the following.

| A     | C     | G     | T     |
|-------|-------|-------|-------|
| 0.291 | 0.211 | 0.201 | 0.297 |

 $P_I(x_1|x_0, \theta_I)$ 

After the optimization, the estimated parameters are replaced with the parameters of the conditional stationary distribution of  $P_I(x_\ell|x_{\ell-2}, x_{\ell-1}, \theta_I)$ , which are listed in the following.

| $x_0$ | A     | C     | G     | T     |
|-------|-------|-------|-------|-------|
| A     | 0.343 | 0.179 | 0.193 | 0.285 |
| C     | 0.293 | 0.239 | 0.186 | 0.283 |
| G     | 0.293 | 0.225 | 0.226 | 0.256 |
| T     | 0.238 | 0.213 | 0.203 | 0.346 |

$$P_I(x_\ell | x_{\ell-2}, x_{\ell-1}, \theta_I)$$

| $x_{\ell-2}x_{\ell-1}$ | A     | C     | G     | T     |
|------------------------|-------|-------|-------|-------|
| AA                     | 0.393 | 0.167 | 0.176 | 0.264 |
| AC                     | 0.329 | 0.229 | 0.172 | 0.270 |
| AG                     | 0.330 | 0.212 | 0.209 | 0.249 |
| AT                     | 0.278 | 0.200 | 0.196 | 0.325 |
| CA                     | 0.327 | 0.218 | 0.175 | 0.280 |
| CC                     | 0.299 | 0.236 | 0.206 | 0.258 |
| CG                     | 0.266 | 0.254 | 0.252 | 0.228 |
| CT                     | 0.225 | 0.276 | 0.185 | 0.314 |
| GA                     | 0.311 | 0.170 | 0.247 | 0.272 |
| GC                     | 0.268 | 0.259 | 0.207 | 0.265 |
| GG                     | 0.289 | 0.245 | 0.222 | 0.244 |
| GT                     | 0.231 | 0.197 | 0.243 | 0.329 |
| TA                     | 0.313 | 0.168 | 0.188 | 0.332 |
| TC                     | 0.275 | 0.235 | 0.165 | 0.325 |
| TG                     | 0.279 | 0.203 | 0.228 | 0.290 |
| TT                     | 0.218 | 0.193 | 0.200 | 0.389 |

### RVD sequences of TAL effectors

In the following, we list the RVD sequences of the TAL effectors considered in this paper. The amino acids of the RVD are given in one-letter code and RVDs are separated by dashes. The symbol \* indicates a missing amino acid in the repeat.

#### **Avrpth3**

NS-HD-NI-NG-NI-HG-NG-HD-NN-NI-NG-HD-NN-NS-NN-NG-NN

#### **Avrpth14**

NS-HD-NI-NG-NI-HG-NI-NI-NG-NG-HD-NN-NI-NG-HD-NN-NS-NN-NG-NN

#### **XOCORF\_0460**

HD-HD-HD-HD-HD-NG-HD-NN-HD-NG-HG-NN-HD-N\*-NG-NG

#### **XOCORF\_0463**

NI-NN-NI-NI-NG-HD-NG-NN-NI-NN-NI-NN-HD

#### **XOCORF\_0473**

NN-HD-NI-NK-HD-HD-HD-NG-NI-NN-HD-HD-NG

#### **XOCORF\_1565**

NN-NN-ND-N\*-NS-NS-YG-NI-SN-HD-HD-NG-NS-NN-HD-NG

#### **XOCORF\_1566**

HD-HD-NG-NI-HG-HD-HG-NI-HD-NN-HD-HG-HG-HG-NG-NI-NG

#### **XOCORF\_1567**

NI-NN-NI-NI-NI-N\*-NG-NN-NN-NI-NS-NG

#### **XOCORF\_1570**

NI-HG-N\*-NN-N\*-HD-HD-NN-HD-NK-HG-NN-NN-NG-HD

#### **XOCORF\_1572**

HD-HD-NN-NG-N\*-HD-NI-NG-HD-NG-NS-HD-HA-ND-N\*-NN-HD-NN-HD-N\*-NN-NG-HD

#### **XOCORF\_1583**

HD-HD-NC-HD-NC-NG-HH-NI-NG-N\*-NS-N\*-HD-HD-NS-NI-HG-NG

#### **XOCORF\_1704**







NI-NG-NN-NG-NK-NG-NI-NN-NI-NN-NI-NN-NS-NG-NS-NN-NI-N\*-NS-NG

**XOO2866\_MAFF**

NI-HG-NI-NI-HG-HD-NN-HD-HD-HD-NI-NI-NN-NI-HD-HD-HD-HG-NN-NN-HD-NS-NN-HD-NG-NS-N\*

**XOO1134\_MAFF**

NI-NN-N\*-NG-NS-NN-NN-NN-NI-NN-NI-N\*-HD-HD-NI-NG-NG

**XOO2001\_MAFF**

NN-HD-NS-NG-HD-NN-N\*-NI-HD-NS-HD-NN-HD-NN-HD-NN-NN-NN-NN-NN-NN-NN-HD-NG

**PthXo3**

NI-HG-NI-HG-NI-NI-NI-HD-NN-HD-HD-HD-NG-HD-NG-NI-HD-HD-NN-NS-NI-NN-NN-NG-NN-HD-N\*-NS-N\*

**PthA1**

NI-N\*-NI-N\*-NI-HD-HD-N\*-NI-HD-NI-HD-N\*-NI-HD-HD-NG

**PthA2**

NI-HD-NI-HD-NI-HD-HD-NG-HD-NG-NG-NG-NG-NI-NI-NG

**PthA3**

NI-HD-NI-HD-NI-NG-HD-NG-NG-NG-NG-NI-NI-NI-NI-HD-NG

**PthA4**

NI-N\*-NI-NI-NI-HD-HD-NG-HD-NG-NG-NG-NG-NS-HD-HD-NG-NG

**Hax2**

NN-IG-NG-NI-NG-NG-HD-NG-HD-NI-HD-NI-HD-NG-HD-NG-HD-HD-NG-NG-NI-NG

### Known TAL effectors of *Xanthomonas* strains

*Xoo* PXO99<sup>A</sup>:

AvrXa27, PthXo1, PthXo6, PthXo7, Tal2a, Tal4, Tal5a, Tal6a, Tal7a, Tal7b, Tal8a, Tal8b, Tal9a, Tal9b, Tal9d, Tal9e

*Xoc* BSL256:

Avrpth3, Avrpth14, XOCORF\_0460, XOCORF\_0463, XOCORF\_0473, XOCORF\_1565, XOCORF\_1566, XOCORF\_1567, XOCORF\_1570, XOCORF\_1572, XOCORF\_1583, XOCORF\_1704, XOCORF\_1709, XOCORF\_1716, XOCORF\_2007, XOCORF\_2009, XOCORF\_2010, XOCORF\_2480, XOCORF\_2485, XOCORF\_2857, XOCORF\_2892, XOCORF\_4025, XOCORF\_4248, XOCORF\_4250, XOCORF\_4384, XOCORF\_4392, XOCORF\_4399, XOCORF\_4531

*Xoo* BAI3:

TalC

*Xoo* MAF311018:

XOO1132\_MAFF, XOO1134\_MAFF, XOO1136\_MAFF, XOO1138\_MAFF, XOO1996\_MAFF, XOO1998\_MAFF, XOO2001\_MAFF, XOO2127\_MAFF, XOO2129\_MAFF, XOO2158\_MAFF, XOO2160\_MAFF, XOO2864\_MAFF, XOO2865\_MAFF, XOO2866\_MAFF, XOO2868\_MAFF, XOO4014\_MAFF

*Xac* 306:

PthA1, PthA2, PthA3, PthA4

## GUS assays and reporter constructs

Constructs were done similar as described previously [5]. The minimal *pBs4* promoter was PCR amplified and inserted into pENTR/D-TOPO (Invitrogen) with AvrXa10 target boxes at the 5' end. Promoters were recombined into the binary vector pGWB3 [6] containing a promoterless  $\beta$ -glucuronidase (*uidA*) gene. AvrXa10 was expressed from pGWB2 [6]. ArtBs4 was constructed with RVDs (NG-NN-NG-NI-NG-NI-NG-NI-NI-HD-NG-NG-NG) to match a sequence (TTGTATATAACTTT) present in the minimal *pBs4* promoter using a modified Golden TAL Technology [7]. TAL effector genes were under control of the constitutive *35S* promoter.

$\beta$ -glucuronidase (GUS) assays were done as described previously [5]. Briefly, to assay GUS reporter activity, *Agrobacterium tumefaciens* strains delivering TAL effector constructs and GUS reporter constructs were mixed 1:1, and inoculated into 5-7 week old *Nicotiana benthamiana* leaves with an OD600 of 0.8. For qualitative GUS assays, leaf discs were sampled two days post infiltration (dpi), incubated in X-Gluc (5-bromo-4-chloro-3-indolyl- $\beta$ -D-glucuronide) staining solution [8], destained in ethanol, and dried with acetate foil. For quantitative assays, two leaf discs (0.9 cm diameter) were sampled 2 dpi and GUS activity was determined using 4-methyl-umbelliferyl- $\beta$ -D-glucuronide (MUG) as substrate. Proteins were quantified using Bradford assays (BioRad). Data correspond to triplicate samples from different plants. Experiments were performed twice with similar results.

## References

1. Meila-Predovicu M (1999) Learning with Mixtures of Trees. Ph.D. thesis, Massachusetts Institute of Technology. URL <http://people.csail.mit.edu/mmp/thesis.pdf>.
2. Keilwagen J, Grau J, Posch S, Grosse I (2010) Apples and oranges: avoiding different priors in Bayesian DNA sequence analysis. BMC Bioinformatics 11: 149.
3. Buntine WL (1991) Theory refinement of Bayesian networks. In: Uncertainty in Artificial Intelligence. Morgan Kaufmann, pp. 52-62.
4. Heckerman D, Geiger D, Chickering DM (1995) Learning Bayesian networks: The combination of knowledge and statistical data. In: Machine Learning. pp. 197-243.
5. Boch J, Scholze H, Schornack S, Landgraf A, Hahn S, et al. (2009) Breaking the Code of DNA Binding Specificity of TAL-Type III Effectors. Science 326: 1509-1512.
6. Nakagawa T, Kurose T, Hino T, Tanaka K, Kawamukai M, et al. (2007) Development of Series of Gateway Binary Vectors, pGWBs, for Realizing Efficient Construction of Fusion Genes for Plant Transformation. Journal of Bioscience and Bioengineering 104: 34-41.
7. Geißler R, Scholze H, Hahn S, Streubel J, Bonas U, et al. (2011) Transcriptional Activators of Human Genes with Programmable DNA-Specificity. PLoS ONE 6: e19509.
8. Schornack S, Peter K, Bonas U, Lahaye T (2005) Expression Levels of avrBs3-Like Genes Affect Recognition Specificity in Tomato Bs4- But Not in Pepper Bs3-Mediated Perception. Molecular Plant-Microbe Interactions 18: 1215-1225.
