# Supplementary material for: Computational Predictions Provide Insights into the Biology of TAL Effector Target Sites
Source: PLoS Comput Biol. 2013 Mar 14;9(3):e1002962. doi: 10.1371/journal.pcbi.1002962 (PMC3597551; doi:10.1371/journal.pcbi.1002962)
Supplement: Table S1 — Tabular overview of training data. A list of all pairs of RVD sequence and target sequence used for training the TALgetter model. Includes the name of the TAL effector, the name of the target site (if applicable), and GUS activity (if applicable). (XLS) [file pcbi.1002962.s009.xls]

## Sheet: Sheet1
Name	Box	RVDs	target site	weight	GUS activity	Reference
PthXo3	Os11N3	NI-HG-NI-HG-NI-NI-NI-HD-NN-HD-HD-HD-NG-HD-N*-NI-HD-HD-NN-NS-NI-NN-NN-NG-NN-HD-N*-NS-N*	TATATAAACCCCCTCCAACCAGGTGCTAAG	1.0		Antony et al. 2010
AvrBs3	Bs3 UPA-box	HD-NG-NS-NG-NI-NI-NI-HD-HD-NG-NS-NS-HD-HD-HD-NG-HD-NG	TATATAAACCTAACCATCC	1.0		Boch et al. 2009
AvrBs3∆rep109	Bs3 UPA-box	HD-NG-NS-NG-NI-NI-NI-HD-HD-NG-NS-NS-NG-HD-NG	TATATAAACCTAACCA	1.0		Boch et al. 2009
AvrHah1	Bs3 UPA-box	NN-IG-NI-NI-NI-HD-HD-NG-NN-NI-HD-HD-HD-NG	TATAAACCTAACCAT	1.0		Boch et al. 2009
AvrBs3∆rep16	Bs3-E UPA-like-box	HD-NG-NS-NG-NI-NI-NI-HD-HD-NG-HD-NG-HD-NG	TATATAAACCTCTCT	1.0		Boch et al. 2009
AvrBs3	UPA10	HD-NG-NS-NG-NI-NI-NI-HD-HD-NG-NS-NS-HD-HD-HD-NG-HD-NG	TATATAAACCAACCCCCAT	1.0		Kay et al. 2009
AvrBs3	UPA12	HD-NG-NS-NG-NI-NI-NI-HD-HD-NG-NS-NS-HD-HD-HD-NG-HD-NG	TAAGTAAAACTCTCCCTCT	1.0		Kay et al. 2009
AvrBs3	UPA14	HD-NG-NS-NG-NI-NI-NI-HD-HD-NG-NS-NS-HD-HD-HD-NG-HD-NG	TAAATAAACCTCCCTCTCC	1.0		Kay et al. 2009
AvrBs3	UPA19	HD-NG-NS-NG-NI-NI-NI-HD-HD-NG-NS-NS-HD-HD-HD-NG-HD-NG	TATATACACCCCTCCTCCC	1.0		Kay et al. 2009
AvrBs3	UPA21	HD-NG-NS-NG-NI-NI-NI-HD-HD-NG-NS-NS-HD-HD-HD-NG-HD-NG	TATATAAAACCAAAACCCT	1.0		Kay et al. 2009
AvrBs3	UPA23	HD-NG-NS-NG-NI-NI-NI-HD-HD-NG-NS-NS-HD-HD-HD-NG-HD-NG	TATATAAAACTTCCCTCTC	1.0		Kay et al. 2009
AvrBs3	UPA25	HD-NG-NS-NG-NI-NI-NI-HD-HD-NG-NS-NS-HD-HD-HD-NG-HD-NG	AATAAAAACCTGCCCCTCT	1.0		Kay et al. 2009
AvrXa27	Xa27	NI-NN-N*-NG-NS-NN-NN-NN-NI-NN-NI-N*-HD-HD-NI-NG-NG	TAGAAGAAGAGACCCATA	1.0		Boch et al. 2009
PthXo1	Xa13	NN-HD-NI-HG-HD-NG-N*-HD-HD-NI-NG-NG-NI-HD-NG-NN-NG-NI-NI-NI-NI-N*-NS-N*	TGCATCTCCCCCTACTGTACACCAC	1.0		Boch et al. 2009
PthXo6	OsTFX1	NI-H*-NI-NN-NN-NN-NN-NN-HD-NI-HD-HG-HD-NI-N*-NS-NI-NI-HG-HD-NS-NS-NG	TATAAAAGGCCCTCACCAACCCAT	1.0		Boch et al. 2009
PthXo7	OsTFIIA?1	NI-NG-NI-NI-N*-NN-HD-HD-N*-NI-NI-NI-NG-HD-HG-NN-NS-NN-HD-HD-NG-N*	TATAATCCCCAAATCCCCTCCTC	1.0		Boch et al. 2009
Hax2	Hax2-Box	NN-IG-NG-NI-NG-NG-HD-NG-HD-NI-HD-NI-HD-NG-HD-NG-HD-HD-NG-NG-NI-NG	TGTTATTCTCACACTCTCCTTAT	1.0		Scholze 2011
Hax4	Hax4-Box	NI-HD-HD-NG-NS-NS-NI-HD-NG-NI-NS-NI-NG-NI-NG	TACCTAAACTAAATAT	1.0		Scholze 2011
ArtBs4	ArtBs4-Box	NG-NN-NG-NI-NG-NI-NG-NI-NI-HD-NG-NG-NG	TTGTATATAACTTT	1.0		Scholze 2011
AvrXa7	Os8N3	NI-HG-NI-NI-NS-HD-NN-HD-HD-HD-NS-N*-N*-HD-HD-NS-NS-NN-NI-NG-NN-NI-N*-NS-N*	TATAAACCCCCTCCAACCGGTGCTAA	1.0		Scholze 2011
PthXo1	Os8N3	NN-HD-NI-HG-HD-NG-N*-HD-HD-NI-NG-NG-NI-HD-NG-NN-NG-NI-NI-NI-NI-N*-NS-N*	TGCATCTCCCCCTACTGTACACCAC	1.0		Moscou et al. 2009
AvrBs3	UPA20	HD-NG-NS-NG-NI-NI-NI-HD-HD-NG-NS-NS-HD-HD-HD-NG-HD-NG	TATATAAACCTGACCCTTT	1.0		Moscou et al. 2009
Tal1c	OsHEN1	HD-HD-HD-HD-HD-NG-HD-NN-HD-NG-HD-NN-HD-N*-NG-NG	CCCCCTCGCTTCCCTT	1.0		Moscou et al. 2009
CCR5-left		NN-NG-NN-NN-NN-HD-NI-NI-HD-NI-NG-NN-HD-NG-NN-NN-NG-HD	TGTGGGCAACATGCTGGTC	1.0		Mussolino et al. 2011
CCR5-right		HD-NG-NG-HD-NI-NN-HD-HD-NG-NG-NG-NG-NN-HD-NI-NN-NG-NG	TCTTCAGCCTTTTGCAGTT	1.0		Mussolino et al. 2011
AvrBs4		NI-NG-NI-NI-NG-NG-NI-NS-NG-NI-NS-NG-HD-HD-NS-HD-NG-NG	TATAATTAATAATCCACTT	1.0		Mussolino et al. 2011
AvrBs3		HD-NG-NS-NG-NI-NI-NI-HD-HD-NG-NS-NS-HD-HD-HD-NG-HD-NG	TCTATAAACCTAACCCTCT	1.0		Mussolino et al. 2011
IL2RG-left		NI-HD-NI-HD-NN-NG-NG-NG-HD-NN-NG-NN-NG-NG-HD-NN-NN-NI	TACACGTTTCGTGTTCGGA	1.0		Mussolino et al. 2011
IL2RG-right		NN-HD-NG-NN-NI-NN-HD-NI-HD-NG-NG-HD-HD-NI-HD-NI-NN-NI	TGCTGAGCACTTCCACAGA	1.0		Mussolino et al. 2011
talC	TalC box P	NS-NG-NS-HD-NI-NG-NN-NG-HD-NI-NN-N*-NI-NN-HD-NG-NI-NN-N*-HD-NN-NG	CATGCATGTCAGCAGCTGGTCAT	1.0		Yu et al. 2011
talC	TalC box O	NS-NG-NS-HD-NI-NG-NN-NG-HD-NI-NN-N*-NI-NN-HD-NG-NI-NN-N*-HD-NN-NG	TATACATGTCAGTAGCTAGTCGT	1.0		Yu et al. 2011
Hax3	Hax3 box	NI-HD-NI-HD-HD-HD-NS-NS-NS-HD-NI-NG	TACACCCAAACAT	1.0		Yu et al. 2011
AvrXa7	Os11N3	NI-HG-NI-NI-NS-HD-NN-HD-HD-HD-NS-N*-N*-HD-HD-NS-NS-NN-NN-NI-NG-NN-NI-N*-NS-N*	TATATAAACCCCCTCCAACCAGGTGCT	1.0		Römer et al. 2010
AvrXa7	Os11N3∆T	NI-HG-NI-NI-NS-HD-NN-HD-HD-HD-NS-N*-N*-HD-HD-NS-NS-NN-NN-NI-NG-NN-NI-N*-NS-N*	CATATAAACCCCCTCCAACCAGGTGCT	1.0		Römer et al. 2011
PthXo1	Xa13 mut A	NN-HD-NI-HG-HD-NG-N*-HD-HD-NI-NG-NG-NI-HD-NG-NN-NG-NI-NI-NI-NI-N*-NS-N*	TACATCTCCCCCTACTGTACACCAC	1.0		Römer et al. 2012
PthXo1	Xa13 mut C	NN-HD-NI-HG-HD-NG-N*-HD-HD-NI-NG-NG-NI-HD-NG-NN-NG-NI-NI-NI-NI-N*-NS-N*	TCCATCTCCCCCTACTGTACACCAC	1.0		Römer et al. 2013
PthXo1	Xa13 mut T (Tepal)	NN-HD-NI-HG-HD-NG-N*-HD-HD-NI-NG-NG-NI-HD-NG-NN-NG-NI-NI-NI-NI-N*-NS-N*	TTCATCTCCCCCTACTGTACACCAC	1.0		Römer et al. 2014
PthXo1	Xa13∆T	NN-HD-NI-HG-HD-NG-N*-HD-HD-NI-NG-NG-NI-HD-NG-NN-NG-NI-NI-NI-NI-N*-NS-N*	AGCATCTCCCCCTACTGTACACCAC	1.0		Römer et al. 2015
PthXo6	OsTFX1∆T	NI-H*-NI-NN-NN-NN-NN-NN-HD-NI-HD-HG-HD-NI-N*-NS-NI-NI-HG-HD-NS-NS-NG	CATAAAAGGCCCTCACCAACCCAT	1.0		Römer et al. 2016
AvrXa10	AvrXa10-Box (A)	NI-HG-NI-HG-NI-NI-NN-HD-NI-HD-NN-HG-NS-NG-HD-NG	TATATAAACACATATCT	0.0476190476190476		Scholze 2011
AvrXa10	AvrXa10-Box (G)	NI-HG-NI-HG-NI-NI-NN-HD-NI-HD-NN-HG-NS-NG-HD-NG	TATATAAGCACGTATCT	0.0476190476190476		Scholze 2011
ArtX1	ArtX1-Box	NI-NG-NG-HD-NG-NN-NN-NN-NI-HD-NN-NG-NG	TATTCTGGGACGTT	0.0476190476190476		Scholze 2011
ArtX2	ArtX2-Box	NI-NG-NN-HD-NN-NN-NG-HD-HD-HD-NG-HD-NG	TATGCGGTCCCTCT	0.0476190476190476		Scholze 2011
ArtX3	ArtX3-Box	NI-NG-NN-NN-NN-NG-NN-HD-HD-HD-NG-NI-NG	TATGGGTGCCCTAT	0.0476190476190476		Scholze 2011
ArtX4	ArtX4-Box	NI-HD-NI-NN-NN-HD-NI-NG-NN-NI-NG-NG-NG	TACAGGCATGATTT	0.0476190476190476		Scholze 2011
ArtX5	ArtX5-Box	NI-NI-NG-NN-HD-HD-HD-HD-NN-NN-HD-NG-NG	TAATGCCCCGGCTT	0.0476190476190476		Scholze 2011
ArtX6	ArtX6-Box	NI-NN-HD-NN-NI-NI-HD-NG-NN-HD-NG	TAGCGAACTGCT	0.0476190476190476		Scholze 2011
ArtX7	ArtX7-Box	NI-NN-HD-NI-NI-NG-NG-NN-NG-HD-NG	TAGCAATTGTCT	0.0476190476190476		Scholze 2011
ArtX8	ArtX8-Box	NI-NG-NN-NG-NN-NI-NI-NG-NN-NI-NG	TATGTGAATGAT	0.0476190476190476		Scholze 2011
ArtX9	ArtX9-Box	NI-NI-NG-HD-NN-NG-NN-HD-NG-NN-NG	TAATCGTGCTGT	0.0476190476190476		Scholze 2011
ArtX10	ArtX10-Box	NI-NG-NN-NN-NI-HD-HD-NN-NG-NN-NG	TATGGACCGTGT	0.0476190476190476		Scholze 2011
Hax4	Hax4-Box NS/A	NI-HD-HD-NG-NS-NS-NI-HD-NG-NI-NS-NI-NG-NI-NG	TACCTCCACTACATAT	0.0476190476190476		Scholze 2011
Hax4	Hax4-Box NS/C	NI-HD-HD-NG-NS-NS-NI-HD-NG-NI-NS-NI-NG-NI-NG	TACCTGGACTAGATAT	0.0476190476190476		Scholze 2011
Hax4	Hax4-Box NS/G	NI-HD-HD-NG-NS-NS-NI-HD-NG-NI-NS-NI-NG-NI-NG	TACCTTTACTATATAT	0.0476190476190476		Scholze 2011
ArtX1	ArtX1-Box NN/A	NI-NG-NG-HD-NG-NN-NN-NN-NI-HD-NN-NG-NG	TATTCTAAAACATT	0.0476190476190476		Scholze 2011
ArtHD14.5	ArtHD-Box	NI-HD-HD-HD-HD-HD-HD-HD-HD-HD-HD-HD-HD-HD-HD	TACCCCCCCCCCCCCC	0.0476190476190476		Scholze 2011
ArtX7.5	ArtX7.5-Box	NI-NG-NN-HD-NN-NG-NN-NG	TATGCGTGT	0.0476190476190476		Scholze 2011
ArtX2	ArtX2-Box B1	NI-NG-NN-HD-NN-NN-NG-HD-HD-HD-NG-HD-NG	TATGCGGTCCCTCA	0.0476190476190476		Scholze 2011
ArtX2	ArtX2-Box B2	NI-NG-NN-HD-NN-NN-NG-HD-HD-HD-NG-HD-NG	TATGCGGTCCCTGA	0.0476190476190476		Scholze 2011
Hax2	Hax2-Box B1	NN-IG-NG-NI-NG-NG-HD-NG-HD-NI-HD-NI-HD-NG-HD-NG-HD-HD-NG-NG-NI-NG	TGTTATTCTCACACTCTCCTTAA	0.0476190476190476		Scholze 2011
ArtTAL6XX – GUS
ArtTAL6NH		NI-HD-NI-HD-HD-HD-NH-NH-NH-NH-NH-NH	TACACCCAAAAAA	0.00293384566446238	-0.0092807	Streubel et al. 2012
ArtTAL6NH		NI-HD-NI-HD-HD-HD-NH-NH-NH-NH-NH-NH	TACACCCCCCCCC	0.00626575347172343	-0.0167919	Streubel et al. 2012
ArtTAL6NH		NI-HD-NI-HD-HD-HD-NH-NH-NH-NH-NH-NH	TACACCCGGGGGG	0.987195331386564	0.47382237	Streubel et al. 2012
ArtTAL6NH		NI-HD-NI-HD-HD-HD-NH-NH-NH-NH-NH-NH	TACACCCTTTTTT	0.00360506947725023	-0.0123803	Streubel et al. 2012
ArtTAL6NI		NI-HD-NI-HD-HD-HD-NI-NI-NI-NI-NI-NI	TACACCCAAAAAA	0.492743160045097	0.247332264	Streubel et al. 2012
ArtTAL6NI		NI-HD-NI-HD-HD-HD-NI-NI-NI-NI-NI-NI	TACACCCCCCCCC	0.121489223545714	0.060981475	Streubel et al. 2012
ArtTAL6NI		NI-HD-NI-HD-HD-HD-NI-NI-NI-NI-NI-NI	TACACCCGGGGGG	0.233611306653727	0.117261117	Streubel et al. 2012
ArtTAL6NI		NI-HD-NI-HD-HD-HD-NI-NI-NI-NI-NI-NI	TACACCCTTTTTT	0.152156309755462	0.076374809	Streubel et al. 2012
ArtTAL6NN		NI-HD-NI-HD-HD-HD-NN-NN-NN-NN-NN-NN	TACACCCAAAAAA	0.0690899634067667	3.659948884	Streubel et al. 2012
ArtTAL6NN		NI-HD-NI-HD-HD-HD-NN-NN-NN-NN-NN-NN	TACACCCCCCCCC	0.0177099083841646	0.938158833	Streubel et al. 2012
ArtTAL6NN		NI-HD-NI-HD-HD-HD-NN-NN-NN-NN-NN-NN	TACACCCGGGGGG	0.911941353276018	48.30887981	Streubel et al. 2012
ArtTAL6NN		NI-HD-NI-HD-HD-HD-NN-NN-NN-NN-NN-NN	TACACCCTTTTTT	0.00125877493305119	0.066681927	Streubel et al. 2012
ArtTAL6HD		NI-HD-NI-HD-HD-HD-HD-HD-HD-HD-HD-HD	TACACCCAAAAAA	0.037959698211941	0.118618174	Streubel et al. 2012
ArtTAL6HD		NI-HD-NI-HD-HD-HD-HD-HD-HD-HD-HD-HD	TACACCCCCCCCC	0.87918350096831	2.747312187	Streubel et al. 2012
ArtTAL6HD		NI-HD-NI-HD-HD-HD-HD-HD-HD-HD-HD-HD	TACACCCGGGGGG	0.0427308287700788	0.133527218	Streubel et al. 2012
ArtTAL6HD		NI-HD-NI-HD-HD-HD-HD-HD-HD-HD-HD-HD	TACACCCTTTTTT	0.0401259720496699	0.125387444	Streubel et al. 2012
ArtTAL6NG		NI-HD-NI-HD-HD-HD-NG-NG-NG-NG-NG-NG	TACACCCAAAAAA	0.0369107847504438	0.072194423	Streubel et al. 2012
ArtTAL6NG		NI-HD-NI-HD-HD-HD-NG-NG-NG-NG-NG-NG	TACACCCCCCCCC	0.0539601371889289	0.105541538	Streubel et al. 2012
ArtTAL6NG		NI-HD-NI-HD-HD-HD-NG-NG-NG-NG-NG-NG	TACACCCGGGGGG	0.022252707339633	0.043524444	Streubel et al. 2012
ArtTAL6NG		NI-HD-NI-HD-HD-HD-NG-NG-NG-NG-NG-NG	TACACCCTTTTTT	0.886876370720994	1.734656379	Streubel et al. 2012
ArtTAL6NS		NI-HD-NI-HD-HD-HD-NS-NS-NS-NS-NS-NS	TACACCCAAAAAA	0.502493429050396	6.586357786	Streubel et al. 2012
ArtTAL6NS		NI-HD-NI-HD-HD-HD-NS-NS-NS-NS-NS-NS	TACACCCCCCCCC	0.0399605105644286	0.523776441	Streubel et al. 2012
ArtTAL6NS		NI-HD-NI-HD-HD-HD-NS-NS-NS-NS-NS-NS	TACACCCGGGGGG	0.447157243682844	5.861046978	Streubel et al. 2012
ArtTAL6NS		NI-HD-NI-HD-HD-HD-NS-NS-NS-NS-NS-NS	TACACCCTTTTTT	0.0103888167023309	0.136169868	Streubel et al. 2012
ArtTAL6NK		NI-HD-NI-HD-HD-HD-NK-NK-NK-NK-NK-NK	TACACCCGGGGGG	1.0	0.47382237	Streubel et al. 2012
ArtTAL6SN		NI-HD-NI-HD-HD-HD-SN-SN-SN-SN-SN-SN	TACACCCAAAAAA	0.171860610001366	0.1202766059	Streubel et al. 2012
ArtTAL6SN		NI-HD-NI-HD-HD-HD-SN-SN-SN-SN-SN-SN	TACACCCCCCCCC	0.105769513390653	0.0740227681	Streubel et al. 2012
ArtTAL6SN		NI-HD-NI-HD-HD-HD-SN-SN-SN-SN-SN-SN	TACACCCGGGGGG	0.636492651809125	0.4454492269	Streubel et al. 2012
ArtTAL6SN		NI-HD-NI-HD-HD-HD-SN-SN-SN-SN-SN-SN	TACACCCTTTTTT	0.0858772247988554	0.0601011548	Streubel et al. 2012
ArtTAL6NP		NI-HD-NI-HD-HD-HD-NP-NP-NP-NP-NP-NP	TACACCCAAAAAA	0.142408258651964	1.9877338313	Streubel et al. 2012
ArtTAL6NP		NI-HD-NI-HD-HD-HD-NP-NP-NP-NP-NP-NP	TACACCCCCCCCC	0.160053248950686	2.2340225262	Streubel et al. 2012
ArtTAL6NP		NI-HD-NI-HD-HD-HD-NP-NP-NP-NP-NP-NP	TACACCCGGGGGG	0.00652596097002078	0.0910893338	Streubel et al. 2012
ArtTAL6NP		NI-HD-NI-HD-HD-HD-NP-NP-NP-NP-NP-NP	TACACCCTTTTTT	0.69101253142733	9.6451497937	Streubel et al. 2012
ArtTAL6HN		NI-HD-NI-HD-HD-HD-HN-HN-HN-HN-HN-HN	TACACCCAAAAAA	0.122473310115324	5.0825788056	Streubel et al. 2012
ArtTAL6HN		NI-HD-NI-HD-HD-HD-HN-HN-HN-HN-HN-HN	TACACCCCCCCCC	0.00511886934083873	0.2124304209	Streubel et al. 2012
ArtTAL6HN		NI-HD-NI-HD-HD-HD-HN-HN-HN-HN-HN-HN	TACACCCGGGGGG	0.871361385626491	36.1610452632	Streubel et al. 2012
ArtTAL6HN		NI-HD-NI-HD-HD-HD-HN-HN-HN-HN-HN-HN	TACACCCTTTTTT	0.00104643491734673	0.043426506	Streubel et al. 2012
ArtTAL6NH		NI-HD-NI-HD-HD-HD-NH-NH-NH-NH-NH-NH	TACACCCCCCCCC	0.00225695020488156	0.0604179993	Streubel et al. 2012
ArtTal6NH		NI-HD-NI-HD-HD-HD-NH-NH-NH-NH-NH-NH	TACACCCGGGGGG	0.997743049795118	26.7093349052	Streubel et al. 2012
ArtTAL6NT		NI-HD-NI-HD-HD-HD-NT-NT-NT-NT-NT-NT	TACACCCAAAAAA	0.244624634211515	5.1561626602	Streubel et al. 2012
ArtTAL6NT		NI-HD-NI-HD-HD-HD-NT-NT-NT-NT-NT-NT	TACACCCCCCCCC	0.00576903306330422	0.1215988445	Streubel et al. 2012
ArtTAL6NT		NI-HD-NI-HD-HD-HD-NT-NT-NT-NT-NT-NT	TACACCCGGGGGG	0.745218097843168	15.7075992864	Streubel et al. 2012
ArtTAL6NT		NI-HD-NI-HD-HD-HD-NT-NT-NT-NT-NT-NT	TACACCCTTTTTT	0.00438823488201201	0.0924945802	Streubel et al. 2012
SELEX
TALE13		NI-N*-NI-NI-NI-N*-NI-HD-HD-NG-NG-HD-NG	TATAAATACCTTCT	0.0204081632653061		Miller et al. 2011
TALE13		NI-N*-NI-NI-NI-N*-NI-HD-HD-NG-NG-HD-NG	TATAAATACCTTCT	0.0204081632653061		Miller et al. 2011
TALE13		NI-N*-NI-NI-NI-N*-NI-HD-HD-NG-NG-HD-NG	TATCAATACCTTCT	0.0204081632653061		Miller et al. 2011
TALE13		NI-N*-NI-NI-NI-N*-NI-HD-HD-NG-NG-HD-NG	TATCAATACCTTCT	0.0204081632653061		Miller et al. 2011
TALE13		NI-N*-NI-NI-NI-N*-NI-HD-HD-NG-NG-HD-NG	TATAAATACCTTCT	0.0204081632653061		Miller et al. 2011
TALE13		NI-N*-NI-NI-NI-N*-NI-HD-HD-NG-NG-HD-NG	TATAAATACCTTCT	0.0204081632653061		Miller et al. 2011
TALE13		NI-N*-NI-NI-NI-N*-NI-HD-HD-NG-NG-HD-NG	TATAAATACCTTCT	0.0204081632653061		Miller et al. 2011
TALE13		NI-N*-NI-NI-NI-N*-NI-HD-HD-NG-NG-HD-NG	TATAAATACCTTCT	0.0204081632653061		Miller et al. 2011
TALE13		NI-N*-NI-NI-NI-N*-NI-HD-HD-NG-NG-HD-NG	TATAAACACCTTCT	0.0204081632653061		Miller et al. 2011
TALE13		NI-N*-NI-NI-NI-N*-NI-HD-HD-NG-NG-HD-NG	TATCAATACCTTCT	0.0204081632653061		Miller et al. 2011
TALE13		NI-N*-NI-NI-NI-N*-NI-HD-HD-NG-NG-HD-NG	TATAAATACCTTCT	0.0204081632653061		Miller et al. 2011
TALE13		NI-N*-NI-NI-NI-N*-NI-HD-HD-NG-NG-HD-NG	TATAAATACCTTCT	0.0204081632653061		Miller et al. 2011
TALE13		NI-N*-NI-NI-NI-N*-NI-HD-HD-NG-NG-HD-NG	TATAAATACCTTCT	0.0204081632653061		Miller et al. 2011
TALE13		NI-N*-NI-NI-NI-N*-NI-HD-HD-NG-NG-HD-NG	TATAAATACCTTCT	0.0204081632653061		Miller et al. 2011
TALE13		NI-N*-NI-NI-NI-N*-NI-HD-HD-NG-NG-HD-NG	TATACATACCTTCT	0.0204081632653061		Miller et al. 2011
TALE13		NI-N*-NI-NI-NI-N*-NI-HD-HD-NG-NG-HD-NG	TATAAATACCTTCT	0.0204081632653061		Miller et al. 2011
TALE13		NI-N*-NI-NI-NI-N*-NI-HD-HD-NG-NG-HD-NG	TATACATACCTTCT	0.0204081632653061		Miller et al. 2011
TALE13		NI-N*-NI-NI-NI-N*-NI-HD-HD-NG-NG-HD-NG	TATCAATACCTTCT	0.0204081632653061		Miller et al. 2011
TALE13		NI-N*-NI-NI-NI-N*-NI-HD-HD-NG-NG-HD-NG	TATGAATACCTTCT	0.0204081632653061		Miller et al. 2011
TALE13		NI-N*-NI-NI-NI-N*-NI-HD-HD-NG-NG-HD-NG	TATAAATACCTTCT	0.0204081632653061		Miller et al. 2011
TALE13		NI-N*-NI-NI-NI-N*-NI-HD-HD-NG-NG-HD-NG	TGTATATACCTTCT	0.0204081632653061		Miller et al. 2011
TALE13		NI-N*-NI-NI-NI-N*-NI-HD-HD-NG-NG-HD-NG	TATAAATACCTTCT	0.0204081632653061		Miller et al. 2011
TALE13		NI-N*-NI-NI-NI-N*-NI-HD-HD-NG-NG-HD-NG	TATCAATACCTTCT	0.0204081632653061		Miller et al. 2011
TALE13		NI-N*-NI-NI-NI-N*-NI-HD-HD-NG-NG-HD-NG	TATAAACACCTTCT	0.0204081632653061		Miller et al. 2011
TALE13		NI-N*-NI-NI-NI-N*-NI-HD-HD-NG-NG-HD-NG	TATAAATACCTTCT	0.0204081632653061		Miller et al. 2011
TALE13		NI-N*-NI-NI-NI-N*-NI-HD-HD-NG-NG-HD-NG	TATAAATACCTTCT	0.0204081632653061		Miller et al. 2011
TALE13		NI-N*-NI-NI-NI-N*-NI-HD-HD-NG-NG-HD-NG	TATAAATACCTTCT	0.0204081632653061		Miller et al. 2011
TALE13		NI-N*-NI-NI-NI-N*-NI-HD-HD-NG-NG-HD-NG	TATAAATACCTTCT	0.0204081632653061		Miller et al. 2011
TALE13		NI-N*-NI-NI-NI-N*-NI-HD-HD-NG-NG-HD-NG	TATATAAACCTTCC	0.0204081632653061		Miller et al. 2011
TALE13		NI-N*-NI-NI-NI-N*-NI-HD-HD-NG-NG-HD-NG	TATAAATACCTTCT	0.0204081632653061		Miller et al. 2011
TALE13		NI-N*-NI-NI-NI-N*-NI-HD-HD-NG-NG-HD-NG	TGTAAATACCTTCT	0.0204081632653061		Miller et al. 2011
TALE13		NI-N*-NI-NI-NI-N*-NI-HD-HD-NG-NG-HD-NG	TATGAATACCTTCT	0.0204081632653061		Miller et al. 2011
TALE13		NI-N*-NI-NI-NI-N*-NI-HD-HD-NG-NG-HD-NG	TATGAATACCTTCT	0.0204081632653061		Miller et al. 2011
TALE13		NI-N*-NI-NI-NI-N*-NI-HD-HD-NG-NG-HD-NG	TATCAATACCTTCT	0.0204081632653061		Miller et al. 2011
TALE13		NI-N*-NI-NI-NI-N*-NI-HD-HD-NG-NG-HD-NG	TATAAATACCTTCT	0.0204081632653061		Miller et al. 2011
TALE13		NI-N*-NI-NI-NI-N*-NI-HD-HD-NG-NG-HD-NG	TATAAATACCTTCT	0.0204081632653061		Miller et al. 2011
TALE13		NI-N*-NI-NI-NI-N*-NI-HD-HD-NG-NG-HD-NG	TATAAATACCTTCT	0.0204081632653061		Miller et al. 2011
TALE13		NI-N*-NI-NI-NI-N*-NI-HD-HD-NG-NG-HD-NG	TATAAATACCTTCT	0.0204081632653061		Miller et al. 2011
TALE13		NI-N*-NI-NI-NI-N*-NI-HD-HD-NG-NG-HD-NG	TATAAATACCTTCT	0.0204081632653061		Miller et al. 2011
TALE13		NI-N*-NI-NI-NI-N*-NI-HD-HD-NG-NG-HD-NG	TATAAATACCTTCT	0.0204081632653061		Miller et al. 2011
TALE13		NI-N*-NI-NI-NI-N*-NI-HD-HD-NG-NG-HD-NG	TATAAATACCTTCT	0.0204081632653061		Miller et al. 2011
TALE13		NI-N*-NI-NI-NI-N*-NI-HD-HD-NG-NG-HD-NG	TGTAAATACCTTCT	0.0204081632653061		Miller et al. 2011
TALE13		NI-N*-NI-NI-NI-N*-NI-HD-HD-NG-NG-HD-NG	TATAAATACCTTCT	0.0204081632653061		Miller et al. 2011
TALE13		NI-N*-NI-NI-NI-N*-NI-HD-HD-NG-NG-HD-NG	TATAAATACCTTCT	0.0204081632653061		Miller et al. 2011
TALE13		NI-N*-NI-NI-NI-N*-NI-HD-HD-NG-NG-HD-NG	TACCAATACCTTCT	0.0204081632653061		Miller et al. 2011
TALE13		NI-N*-NI-NI-NI-N*-NI-HD-HD-NG-NG-HD-NG	TATAAATACCTTCT	0.0204081632653061		Miller et al. 2011
TALE13		NI-N*-NI-NI-NI-N*-NI-HD-HD-NG-NG-HD-NG	TATAAATACCTTCT	0.0204081632653061		Miller et al. 2011
TALE13		NI-N*-NI-NI-NI-N*-NI-HD-HD-NG-NG-HD-NG	TATAAATACCTTCT	0.0204081632653061		Miller et al. 2011
TALE13		NI-N*-NI-NI-NI-N*-NI-HD-HD-NG-NG-HD-NG	TATAAATACCTTCT	0.0204081632653061		Miller et al. 2011
NT-L		NN-NN-NI-NN-HD-HD-NI-NG-HD-NG-NN-NK-HD-HD-NN-NK-NN-NG	TGGAGCCATCTGGCCGGGT	0.0357142857142857		Miller et al. 2011
NT-L		NN-NN-NI-NN-HD-HD-NI-NG-HD-NG-NN-NK-HD-HD-NN-NK-NN-NG	TGGATCCATGTGGCCGGGT	0.0357142857142857		Miller et al. 2011
NT-L		NN-NN-NI-NN-HD-HD-NI-NG-HD-NG-NN-NK-HD-HD-NN-NK-NN-NG	TGGAACCCTCTGGCCGGGT	0.0357142857142857		Miller et al. 2011
NT-L		NN-NN-NI-NN-HD-HD-NI-NG-HD-NG-NN-NK-HD-HD-NN-NK-NN-NG	TGGAGACATCTGGCAGGGT	0.0357142857142857		Miller et al. 2011
NT-L		NN-NN-NI-NN-HD-HD-NI-NG-HD-NG-NN-NK-HD-HD-NN-NK-NN-NG	CAGAAACATCTGGCCGGAC	0.0357142857142857		Miller et al. 2011
NT-L		NN-NN-NI-NN-HD-HD-NI-NG-HD-NG-NN-NK-HD-HD-NN-NK-NN-NG	TGGCTCCATCTGGCCGGGT	0.0357142857142857		Miller et al. 2011
NT-L		NN-NN-NI-NN-HD-HD-NI-NG-HD-NG-NN-NK-HD-HD-NN-NK-NN-NG	TGAAACCATAAGGCCGGGG	0.0357142857142857		Miller et al. 2011
NT-L		NN-NN-NI-NN-HD-HD-NI-NG-HD-NG-NN-NK-HD-HD-NN-NK-NN-NG	TGAAACCATCTGATCCCTA	0.0357142857142857		Miller et al. 2011
NT-L		NN-NN-NI-NN-HD-HD-NI-NG-HD-NG-NN-NK-HD-HD-NN-NK-NN-NG	TGGATCCGTCTGCCCGGGT	0.0357142857142857		Miller et al. 2011
NT-L		NN-NN-NI-NN-HD-HD-NI-NG-HD-NG-NN-NK-HD-HD-NN-NK-NN-NG	TGGAGCCATGTGGCCGGGC	0.0357142857142857		Miller et al. 2011
NT-L		NN-NN-NI-NN-HD-HD-NI-NG-HD-NG-NN-NK-HD-HD-NN-NK-NN-NG	TGGACCCCCCTGGCCGGGT	0.0357142857142857		Miller et al. 2011
NT-L		NN-NN-NI-NN-HD-HD-NI-NG-HD-NG-NN-NK-HD-HD-NN-NK-NN-NG	TGGCGCCATCTGGCCGGGT	0.0357142857142857		Miller et al. 2011
NT-L		NN-NN-NI-NN-HD-HD-NI-NG-HD-NG-NN-NK-HD-HD-NN-NK-NN-NG	TGGAGCCATGTGGCCGGGC	0.0357142857142857		Miller et al. 2011
NT-L		NN-NN-NI-NN-HD-HD-NI-NG-HD-NG-NN-NK-HD-HD-NN-NK-NN-NG	TAGAAACATCTGGCAGTCC	0.0357142857142857		Miller et al. 2011
NT-L		NN-NN-NI-NN-HD-HD-NI-NG-HD-NG-NN-NK-HD-HD-NN-NK-NN-NG	TGGAAACATCTGGCTGGGT	0.0357142857142857		Miller et al. 2011
NT-L		NN-NN-NI-NN-HD-HD-NI-NG-HD-NG-NN-NK-HD-HD-NN-NK-NN-NG	TGGAACCATGAGGCCGGGT	0.0357142857142857		Miller et al. 2011
NT-L		NN-NN-NI-NN-HD-HD-NI-NG-HD-NG-NN-NK-HD-HD-NN-NK-NN-NG	TGGAGCCATCTGGCCGTTC	0.0357142857142857		Miller et al. 2011
NT-L		NN-NN-NI-NN-HD-HD-NI-NG-HD-NG-NN-NK-HD-HD-NN-NK-NN-NG	TAGAAACATCTGACCGGCT	0.0357142857142857		Miller et al. 2011
NT-L		NN-NN-NI-NN-HD-HD-NI-NG-HD-NG-NN-NK-HD-HD-NN-NK-NN-NG	TAGAAACATAAGGCCGGGT	0.0357142857142857		Miller et al. 2011
NT-L		NN-NN-NI-NN-HD-HD-NI-NG-HD-NG-NN-NK-HD-HD-NN-NK-NN-NG	TGAAACCATAAGACCGGGT	0.0357142857142857		Miller et al. 2011
NT-L		NN-NN-NI-NN-HD-HD-NI-NG-HD-NG-NN-NK-HD-HD-NN-NK-NN-NG	TGGGTCCATATGGCCGGGT	0.0357142857142857		Miller et al. 2011
NT-L		NN-NN-NI-NN-HD-HD-NI-NG-HD-NG-NN-NK-HD-HD-NN-NK-NN-NG	TGGATCCATCTGACCGGGT	0.0357142857142857		Miller et al. 2011
NT-L		NN-NN-NI-NN-HD-HD-NI-NG-HD-NG-NN-NK-HD-HD-NN-NK-NN-NG	TGGAGCCACCTGACCGGAC	0.0357142857142857		Miller et al. 2011
NT-L		NN-NN-NI-NN-HD-HD-NI-NG-HD-NG-NN-NK-HD-HD-NN-NK-NN-NG	TAGAGCTATAAGACCCAGT	0.0357142857142857		Miller et al. 2011
NT-L		NN-NN-NI-NN-HD-HD-NI-NG-HD-NG-NN-NK-HD-HD-NN-NK-NN-NG	TGGCACCATCTAGCCGTGC	0.0357142857142857		Miller et al. 2011
NT-L		NN-NN-NI-NN-HD-HD-NI-NG-HD-NG-NN-NK-HD-HD-NN-NK-NN-NG	TGGATCCATCTGGCCGGGG	0.0357142857142857		Miller et al. 2011
NT-L		NN-NN-NI-NN-HD-HD-NI-NG-HD-NG-NN-NK-HD-HD-NN-NK-NN-NG	TGGAACCATGTGGCCGGGT	0.0357142857142857		Miller et al. 2011
NT-L		NN-NN-NI-NN-HD-HD-NI-NG-HD-NG-NN-NK-HD-HD-NN-NK-NN-NG	TAGAACCATCCGGCCGGGT	0.0357142857142857		Miller et al. 2011
NT-R		NN-NI-NI-HD-NI-NK-NI-NI-NG-HD-NG-NK-HD-NN-HD-NK-NN-NG	TGGACAGGATCTGCGCGGT	0.022222222222222		Miller et al. 2011
NT-R		NN-NI-NI-HD-NI-NK-NI-NI-NG-HD-NG-NK-HD-NN-HD-NK-NN-NG	TAAACAGCATATGCACGAT	0.022222222222222		Miller et al. 2011
NT-R		NN-NI-NI-HD-NI-NK-NI-NI-NG-HD-NG-NK-HD-NN-HD-NK-NN-NG	TGAACAGGATAAGCACGGC	0.022222222222222		Miller et al. 2011
NT-R		NN-NI-NI-HD-NI-NK-NI-NI-NG-HD-NG-NK-HD-NN-HD-NK-NN-NG	TGAACAGTATCTGCACGGT	0.022222222222222		Miller et al. 2011
NT-R		NN-NI-NI-HD-NI-NK-NI-NI-NG-HD-NG-NK-HD-NN-HD-NK-NN-NG	TGAATGGTATCTGCGCGGT	0.022222222222222		Miller et al. 2011
NT-R		NN-NI-NI-HD-NI-NK-NI-NI-NG-HD-NG-NK-HD-NN-HD-NK-NN-NG	TGAACAGGATATGCGCGCT	0.022222222222222		Miller et al. 2011
NT-R		NN-NI-NI-HD-NI-NK-NI-NI-NG-HD-NG-NK-HD-NN-HD-NK-NN-NG	TGAACGGAATATGCGCGAT	0.022222222222222		Miller et al. 2011
NT-R		NN-NI-NI-HD-NI-NK-NI-NI-NG-HD-NG-NK-HD-NN-HD-NK-NN-NG	TGAACAGGATCTGCTCGGT	0.022222222222222		Miller et al. 2011
NT-R		NN-NI-NI-HD-NI-NK-NI-NI-NG-HD-NG-NK-HD-NN-HD-NK-NN-NG	TGCAGATCCTGTTCACTGT	0.022222222222222		Miller et al. 2011
NT-R		NN-NI-NI-HD-NI-NK-NI-NI-NG-HD-NG-NK-HD-NN-HD-NK-NN-NG	TGAACAGGATCTGGGCGGT	0.022222222222222		Miller et al. 2011
NT-R		NN-NI-NI-HD-NI-NK-NI-NI-NG-HD-NG-NK-HD-NN-HD-NK-NN-NG	TGGACAGGATCTGCGCGGT	0.022222222222222		Miller et al. 2011
NT-R		NN-NI-NI-HD-NI-NK-NI-NI-NG-HD-NG-NK-HD-NN-HD-NK-NN-NG	TGAACAGGATCTGAGCGGC	0.022222222222222		Miller et al. 2011
NT-R		NN-NI-NI-HD-NI-NK-NI-NI-NG-HD-NG-NK-HD-NN-HD-NK-NN-NG	TGGATAGGATCTGTGCGGT	0.022222222222222		Miller et al. 2011
NT-R		NN-NI-NI-HD-NI-NK-NI-NI-NG-HD-NG-NK-HD-NN-HD-NK-NN-NG	TGAACAGGATATGCGCGGT	0.022222222222222		Miller et al. 2011
NT-R		NN-NI-NI-HD-NI-NK-NI-NI-NG-HD-NG-NK-HD-NN-HD-NK-NN-NG	TGAACAGGATAGGCACGGC	0.022222222222222		Miller et al. 2011
NT-R		NN-NI-NI-HD-NI-NK-NI-NI-NG-HD-NG-NK-HD-NN-HD-NK-NN-NG	TGAACAGTATCTGCGCGGT	0.022222222222222		Miller et al. 2011
NT-R		NN-NI-NI-HD-NI-NK-NI-NI-NG-HD-NG-NK-HD-NN-HD-NK-NN-NG	CGCGCAGATACTGTTCACT	0.022222222222222		Miller et al. 2011
NT-R		NN-NI-NI-HD-NI-NK-NI-NI-NG-HD-NG-NK-HD-NN-HD-NK-NN-NG	TGAACAGGATAGGCGCGCT	0.022222222222222		Miller et al. 2011
NT-R		NN-NI-NI-HD-NI-NK-NI-NI-NG-HD-NG-NK-HD-NN-HD-NK-NN-NG	TGAACAGTATCTGCGCGGT	0.022222222222222		Miller et al. 2011
NT-R		NN-NI-NI-HD-NI-NK-NI-NI-NG-HD-NG-NK-HD-NN-HD-NK-NN-NG	TGAACAGGATATGCGCGAA	0.022222222222222		Miller et al. 2011
NT-R		NN-NI-NI-HD-NI-NK-NI-NI-NG-HD-NG-NK-HD-NN-HD-NK-NN-NG	TGAACAGTATCTGCGCGGT	0.022222222222222		Miller et al. 2011
NT-R		NN-NI-NI-HD-NI-NK-NI-NI-NG-HD-NG-NK-HD-NN-HD-NK-NN-NG	TGAACGGAATCTGCGCGGT	0.022222222222222		Miller et al. 2011
NT-R		NN-NI-NI-HD-NI-NK-NI-NI-NG-HD-NG-NK-HD-NN-HD-NK-NN-NG	TGAACAGGATAAGCACGGT	0.022222222222222		Miller et al. 2011
NT-R		NN-NI-NI-HD-NI-NK-NI-NI-NG-HD-NG-NK-HD-NN-HD-NK-NN-NG	CGCGCAGATCCTGTTCATA	0.022222222222222		Miller et al. 2011
NT-R		NN-NI-NI-HD-NI-NK-NI-NI-NG-HD-NG-NK-HD-NN-HD-NK-NN-NG	TAAATAGGATCTGCAAGCT	0.022222222222222		Miller et al. 2011
NT-R		NN-NI-NI-HD-NI-NK-NI-NI-NG-HD-NG-NK-HD-NN-HD-NK-NN-NG	TGAACAGGATCTGCGCGGT	0.022222222222222		Miller et al. 2011
NT-R		NN-NI-NI-HD-NI-NK-NI-NI-NG-HD-NG-NK-HD-NN-HD-NK-NN-NG	TGAACGGAATCTGCACGGT	0.022222222222222		Miller et al. 2011
NT-R		NN-NI-NI-HD-NI-NK-NI-NI-NG-HD-NG-NK-HD-NN-HD-NK-NN-NG	TGAACGGGATCGGCGCGGT	0.022222222222222		Miller et al. 2011
NT-R		NN-NI-NI-HD-NI-NK-NI-NI-NG-HD-NG-NK-HD-NN-HD-NK-NN-NG	TGAACAGGATATGCGCGGT	0.022222222222222		Miller et al. 2011
NT-R		NN-NI-NI-HD-NI-NK-NI-NI-NG-HD-NG-NK-HD-NN-HD-NK-NN-NG	TGAACAGGATCTGCGCGGT	0.022222222222222		Miller et al. 2011
NT-R		NN-NI-NI-HD-NI-NK-NI-NI-NG-HD-NG-NK-HD-NN-HD-NK-NN-NG	TGAACGGAATCTGCACGCT	0.022222222222222		Miller et al. 2011
NT-R		NN-NI-NI-HD-NI-NK-NI-NI-NG-HD-NG-NK-HD-NN-HD-NK-NN-NG	TGAACAGGATATGCACGGT	0.022222222222222		Miller et al. 2011
NT-R		NN-NI-NI-HD-NI-NK-NI-NI-NG-HD-NG-NK-HD-NN-HD-NK-NN-NG	TGAATAGGATCTGCGCGCC	0.022222222222222		Miller et al. 2011
NT-R		NN-NI-NI-HD-NI-NK-NI-NI-NG-HD-NG-NK-HD-NN-HD-NK-NN-NG	TGAACAGGATAGGCTCGGT	0.022222222222222		Miller et al. 2011
NT-R		NN-NI-NI-HD-NI-NK-NI-NI-NG-HD-NG-NK-HD-NN-HD-NK-NN-NG	TGAACAGCATCTGCACGAT	0.022222222222222		Miller et al. 2011
NT-R		NN-NI-NI-HD-NI-NK-NI-NI-NG-HD-NG-NK-HD-NN-HD-NK-NN-NG	TGAACGGTATATGCACGGT	0.022222222222222		Miller et al. 2011
NT-R		NN-NI-NI-HD-NI-NK-NI-NI-NG-HD-NG-NK-HD-NN-HD-NK-NN-NG	TGAACAGGATCTGGGCGGA	0.022222222222222		Miller et al. 2011
NT-R		NN-NI-NI-HD-NI-NK-NI-NI-NG-HD-NG-NK-HD-NN-HD-NK-NN-NG	TGAACGGGATCTGCGCGGT	0.022222222222222		Miller et al. 2011
NT-R		NN-NI-NI-HD-NI-NK-NI-NI-NG-HD-NG-NK-HD-NN-HD-NK-NN-NG	TGAACGGGATCGGCGCGGT	0.022222222222222		Miller et al. 2011
NT-R		NN-NI-NI-HD-NI-NK-NI-NI-NG-HD-NG-NK-HD-NN-HD-NK-NN-NG	TGAACAGGATCTGCACGGT	0.022222222222222		Miller et al. 2011
NT-R		NN-NI-NI-HD-NI-NK-NI-NI-NG-HD-NG-NK-HD-NN-HD-NK-NN-NG	TGAACAGTATCTGCACGAT	0.022222222222222		Miller et al. 2011
NT-R		NN-NI-NI-HD-NI-NK-NI-NI-NG-HD-NG-NK-HD-NN-HD-NK-NN-NG	TGAACAGGATATGCGCGGT	0.022222222222222		Miller et al. 2011
NT-R		NN-NI-NI-HD-NI-NK-NI-NI-NG-HD-NG-NK-HD-NN-HD-NK-NN-NG	TGAACAGGATCTGCGCGGG	0.022222222222222		Miller et al. 2011
NT-R		NN-NI-NI-HD-NI-NK-NI-NI-NG-HD-NG-NK-HD-NN-HD-NK-NN-NG	TGAACAGGATCTGCACGGT	0.022222222222222		Miller et al. 2011
NT-R		NN-NI-NI-HD-NI-NK-NI-NI-NG-HD-NG-NK-HD-NN-HD-NK-NN-NG	TGACCTGGACCTATTCACT	0.022222222222222		Miller et al. 2011
VEGF-1		NN-NI-NN-HD-HD-HD-NG-HD-HD-HD-HD-HD-NG-NG	TGGTCCCTCCCCCTT	0.04		Miller et al. 2011
VEGF-1		NN-NI-NN-HD-HD-HD-NG-HD-HD-HD-HD-HD-NG-NG	TGAAACCACCCCCTT	0.04		Miller et al. 2011
VEGF-1		NN-NI-NN-HD-HD-HD-NG-HD-HD-HD-HD-HD-NG-NG	TGATCCCTCCCCCGT	0.04		Miller et al. 2011
VEGF-1		NN-NI-NN-HD-HD-HD-NG-HD-HD-HD-HD-HD-NG-NG	TAAACCCTCCCCCTT	0.04		Miller et al. 2011
VEGF-1		NN-NI-NN-HD-HD-HD-NG-HD-HD-HD-HD-HD-NG-NG	TGAACCCTGCCCCTT	0.04		Miller et al. 2011
VEGF-1		NN-NI-NN-HD-HD-HD-NG-HD-HD-HD-HD-HD-NG-NG	TGAGACCTCCCCCTT	0.04		Miller et al. 2011
VEGF-1		NN-NI-NN-HD-HD-HD-NG-HD-HD-HD-HD-HD-NG-NG	TGAAACCTCACCCTT	0.04		Miller et al. 2011
VEGF-1		NN-NI-NN-HD-HD-HD-NG-HD-HD-HD-HD-HD-NG-NG	TAAACCCTCCTCCTT	0.04		Miller et al. 2011
VEGF-1		NN-NI-NN-HD-HD-HD-NG-HD-HD-HD-HD-HD-NG-NG	TGCACCCTCCCCCGT	0.04		Miller et al. 2011
VEGF-1		NN-NI-NN-HD-HD-HD-NG-HD-HD-HD-HD-HD-NG-NG	TGAGCCCTCCCCCTT	0.04		Miller et al. 2011
VEGF-1		NN-NI-NN-HD-HD-HD-NG-HD-HD-HD-HD-HD-NG-NG	TAGACCCTCCCCCTT	0.04		Miller et al. 2011
VEGF-1		NN-NI-NN-HD-HD-HD-NG-HD-HD-HD-HD-HD-NG-NG	TGATCCCTCCCCCTT	0.04		Miller et al. 2011
VEGF-1		NN-NI-NN-HD-HD-HD-NG-HD-HD-HD-HD-HD-NG-NG	TGAACACTCCCCCTT	0.04		Miller et al. 2011
VEGF-1		NN-NI-NN-HD-HD-HD-NG-HD-HD-HD-HD-HD-NG-NG	TGACCTCTCCCCCTT	0.04		Miller et al. 2011
VEGF-1		NN-NI-NN-HD-HD-HD-NG-HD-HD-HD-HD-HD-NG-NG	TGAACCCTCCCCCTT	0.04		Miller et al. 2011
VEGF-1		NN-NI-NN-HD-HD-HD-NG-HD-HD-HD-HD-HD-NG-NG	TGAAACCTCCCCCTT	0.04		Miller et al. 2011
VEGF-1		NN-NI-NN-HD-HD-HD-NG-HD-HD-HD-HD-HD-NG-NG	TGAAACCTCCCCCTT	0.04		Miller et al. 2011
VEGF-1		NN-NI-NN-HD-HD-HD-NG-HD-HD-HD-HD-HD-NG-NG	TAGACCCTCCCCCTT	0.04		Miller et al. 2011
VEGF-1		NN-NI-NN-HD-HD-HD-NG-HD-HD-HD-HD-HD-NG-NG	TGAGCCCTCCCCCTT	0.04		Miller et al. 2011
VEGF-1		NN-NI-NN-HD-HD-HD-NG-HD-HD-HD-HD-HD-NG-NG	TGCGCCCTCCCCCAT	0.04		Miller et al. 2011
VEGF-1		NN-NI-NN-HD-HD-HD-NG-HD-HD-HD-HD-HD-NG-NG	TGGTCCCTCCCCCTT	0.04		Miller et al. 2011
VEGF-1		NN-NI-NN-HD-HD-HD-NG-HD-HD-HD-HD-HD-NG-NG	TTAACCCTCCCCCTT	0.04		Miller et al. 2011
VEGF-1		NN-NI-NN-HD-HD-HD-NG-HD-HD-HD-HD-HD-NG-NG	TGAGACCCCCCCCTT	0.04		Miller et al. 2011
VEGF-1		NN-NI-NN-HD-HD-HD-NG-HD-HD-HD-HD-HD-NG-NG	TGAACCCTACCCCTT	0.04		Miller et al. 2011
VEGF-1		NN-NI-NN-HD-HD-HD-NG-HD-HD-HD-HD-HD-NG-NG	TAAACCCTCACCCTT	0.04		Miller et al. 2011
CCR5-1		NK-HD-NG-HD-NG-NG-HD-NI-NN-HD-HD-NG-NG	TGCACTTAAGCCTT	0.0588235		Miller et al. 2011
CCR5-1		NK-HD-NG-HD-NG-NG-HD-NI-NN-HD-HD-NG-NG	TGCTATTCAGCCTT	0.0588235		Miller et al. 2011
CCR5-1		NK-HD-NG-HD-NG-NG-HD-NI-NN-HD-HD-NG-NG	TGCACTTAAGCCTT	0.0588235		Miller et al. 2011
CCR5-1		NK-HD-NG-HD-NG-NG-HD-NI-NN-HD-HD-NG-NG	TGATCTTCAGCCTT	0.0588235		Miller et al. 2011
CCR5-1		NK-HD-NG-HD-NG-NG-HD-NI-NN-HD-HD-NG-NG	TGCTATTCAACCTT	0.0588235		Miller et al. 2011
CCR5-1		NK-HD-NG-HD-NG-NG-HD-NI-NN-HD-HD-NG-NG	TGCTATTCAACCTT	0.0588235		Miller et al. 2011
CCR5-1		NK-HD-NG-HD-NG-NG-HD-NI-NN-HD-HD-NG-NG	TGCTCGTCAGCCTT	0.0588235		Miller et al. 2011
CCR5-1		NK-HD-NG-HD-NG-NG-HD-NI-NN-HD-HD-NG-NG	TGCTCTTCATCCTT	0.0588235		Miller et al. 2011
CCR5-1		NK-HD-NG-HD-NG-NG-HD-NI-NN-HD-HD-NG-NG	TGCTCTTCAACCTT	0.0588235		Miller et al. 2011
CCR5-1		NK-HD-NG-HD-NG-NG-HD-NI-NN-HD-HD-NG-NG	TGCCCTTCAGCCTT	0.0588235		Miller et al. 2011
CCR5-1		NK-HD-NG-HD-NG-NG-HD-NI-NN-HD-HD-NG-NG	TGCTATTCAACCTT	0.0588235		Miller et al. 2011
CCR5-1		NK-HD-NG-HD-NG-NG-HD-NI-NN-HD-HD-NG-NG	TGCACTTCAGCCTT	0.0588235		Miller et al. 2011
CCR5-1		NK-HD-NG-HD-NG-NG-HD-NI-NN-HD-HD-NG-NG	TGCTCTTCAGCCTT	0.0588235		Miller et al. 2011
CCR5-1		NK-HD-NG-HD-NG-NG-HD-NI-NN-HD-HD-NG-NG	TGCTATTCAGCCTT	0.0588235		Miller et al. 2011
CCR5-1		NK-HD-NG-HD-NG-NG-HD-NI-NN-HD-HD-NG-NG	TGCCCTTAAGCCTT	0.0588235		Miller et al. 2011
CCR5-1		NK-HD-NG-HD-NG-NG-HD-NI-NN-HD-HD-NG-NG	TGCCCTTCAGCCTC	0.0588235		Miller et al. 2011
CCR5-1		NK-HD-NG-HD-NG-NG-HD-NI-NN-HD-HD-NG-NG	TGCTCTTCAACCTT	0.0588235		Miller et al. 2011
