# Supplementary material for: Computational Predictions Provide Insights into the Biology of TAL Effector Target Sites
Source: PLoS Comput Biol. 2013 Mar 14;9(3):e1002962. doi: 10.1371/journal.pcbi.1002962 (PMC3597551; doi:10.1371/journal.pcbi.1002962)
Supplement: Table S2 — Predictions for O. sativa . List of all target sites predicted by TALgetter for a rank cutoff of 100 that yield a log-fold change greater than 1 in at least one O. sativa microarray experiment. (XLS) [file pcbi.1002962.s010.xls]

## Sheet: Sheet1
Experimentally tested target sites marked in yellow
transcript	tal effector	log fold-change	annotation	go terms	family	rank	start	distance to atg	sequence	matches	score	p-value	e-value	experiment(s)	tss	rvds
Os07g06970.1	XOCORF_0460	1.9290875	HEN1, putative, expressed	nucleus,regulation of gene expression, epigenetic,nucleobase, nucleoside, nucleotide and nucleic acid metabolic process,response to stress,response to biotic stimulus,flower development,transferase activity,anatomical structure morphogenesis,cytoplasm	NA	1	990	200	TCCCCCTCGCTTCCCTT	M|||||||:|||x|:||	-5.70773	0	0	XOC24h	10	HD-HD-HD-HD-HD-NG-HD-NN-HD-NG-HG-NN-HD-N*-NG-NG
Os10g28630.1	XOO1138_MAFF	5.26754666666667	homocysteine S-methyltransferase protein, putative, expressed	cell,transferase activity,metabolic process,cellular process,biosynthetic process	NA	39	1046	74	CCCCTGTCTTAAACCCCACAC	m||||x||:|||x|x:|||xx	-17.6281	1.29145850866676e-06	105	MAFF311018	-46	HD-HD-HD-NG-N*-NG-HD-S*-HG-NI-NI-NN-HD-NN-ND-HD-NI-HD-HG-NG
Os07g06970.1	XOO1138_MAFF	5.21421333333333	HEN1, putative, expressed	nucleus,regulation of gene expression, epigenetic,nucleobase, nucleoside, nucleotide and nucleic acid metabolic process,response to stress,response to biotic stimulus,flower development,transferase activity,anatomical structure morphogenesis,cytoplasm	NA	1	1001	185	TCCCTTCCCTAAACCCCACTT	M||||:x|:|||x|x:|||||	-12.5899	2.45992096888907e-08	2	MAFF311018	-1	HD-HD-HD-NG-N*-NG-HD-S*-HG-NI-NI-NN-HD-NN-ND-HD-NI-HD-HG-NG
Os08g06620.1	XOO1138_MAFF	3.86092666666667	DNA polymerase delta subunit 4 family, putative, expressed	transferase activity,biosynthetic process,DNA metabolic process	NA	86	932	125	TCCCTCTCACCACCACCTCTC	M||||:||:xx|x|x:|x||x	-18.5036	2.93960555782244e-06	239	MAFF311018	68	HD-HD-HD-NG-N*-NG-HD-S*-HG-NI-NI-NN-HD-NN-ND-HD-NI-HD-HG-NG
Os11g38810.1	XOO1138_MAFF	3.37286333333333	mannose-6-phosphate isomerase, putative, expressed	metabolic process,carbohydrate metabolic process,catalytic activity,reproduction,post-embryonic development,embryo development	NA	80	795	214	TCCCTCCCCCAAACACCACGG	M||||:x|:x||x|x:|||xx	-18.4029	2.66901425124464e-06	217	MAFF311018	205	HD-HD-HD-NG-N*-NG-HD-S*-HG-NI-NI-NN-HD-NN-ND-HD-NI-HD-HG-NG
Os02g51810.1	XOO1138_MAFF	2.62951666666667	expressed protein	transport,cellular component organization,cellular process,metabolic process,protein binding,catalytic activity,mitochondrion,binding,hydrolase activity	NA	47	1032	80	TCCCTCTCCTCGGCTTCCCTT	M||||:||:|xx:|xx|x|||	-17.7922	1.47595258133344e-06	120	MAFF311018	-32	HD-HD-HD-NG-N*-NG-HD-S*-HG-NI-NI-NN-HD-NN-ND-HD-NI-HD-HG-NG
Os06g26234.1	XOO1138_MAFF	2.50039333333333	1,4-alpha-glucan-branching enzyme, putative, expressed	metabolic process,hydrolase activity,catalytic activity,binding,post-embryonic development,carbohydrate metabolic process,plastid,reproduction,embryo development	NA	52	1012	66	TCCCTCTCCTAAACCCCCACC	M||||:||:|||x|x:|xxxx	-17.8477	1.54975021040012e-06	126	MAFF311018	-12	HD-HD-HD-NG-N*-NG-HD-S*-HG-NI-NI-NN-HD-NN-ND-HD-NI-HD-HG-NG
Os12g36940.1	XOO1138_MAFF	2.09697333333333	calmodulin binding protein, putative, expressed	cellular_component,protein binding,biological_process	NA	97	727	341	ACCCTTTCTAAAACGACAAGT	m||||:||:x||x|:x||xx|	-18.6399	3.39469093706692e-06	276	MAFF311018	273	HD-HD-HD-NG-N*-NG-HD-S*-HG-NI-NI-NN-HD-NN-ND-HD-NI-HD-HG-NG
Os07g03170.1	XOO1138_MAFF	2.07868	expressed protein	molecular_function,biological_process,plasma membrane	NA	36	959	122	TCCCTCTATAAAAAGCCTCTT	M||||:|x:x||xx::|x|||	-17.5324	1.15616285537786e-06	94	MAFF311018	41	HD-HD-HD-NG-N*-NG-HD-S*-HG-NI-NI-NN-HD-NN-ND-HD-NI-HD-HG-NG
Os03g57310.1	XOO1138_MAFF	2.05085666666667	syntaxin, putative, expressed	protein binding,response to biotic stimulus,cell death,cellular component organization,cellular process,response to stress,signal transduction,plasma membrane,transport,cellular_component,response to endogenous stimulus,membrane	NA	8	1136	166	TCCCTCCCCCCCGCGCCACCT	M||||:x|:xxx:|::|||x|	-16.0851	3.32089330800025e-07	27	MAFF311018	-136	HD-HD-HD-NG-N*-NG-HD-S*-HG-NI-NI-NN-HD-NN-ND-HD-NI-HD-HG-NG
Os04g58330.1	XOO1138_MAFF	1.49536666666667	expressed protein	molecular_function,biological_process	NA	45	981	237	TCCATTTCTCCAGCGACCCAT	M||x|:||:xx|:|:x|x|x|	-17.7728	1.463652976489e-06	119	MAFF311018	19	HD-HD-HD-NG-N*-NG-HD-S*-HG-NI-NI-NN-HD-NN-ND-HD-NI-HD-HG-NG
Os01g61680.1	XOO1138_MAFF	1.31939333333333	expressed protein	molecular_function,biological_process,plasma membrane	NA	3	826	346	TTCCTCTCGCAAGCGCCACGT	Mx|||:||xx||:|::|||x|	-14.1469	6.14980242222268e-08	5	MAFF311018	174	HD-HD-HD-NG-N*-NG-HD-S*-HG-NI-NI-NN-HD-NN-ND-HD-NI-HD-HG-NG
Os08g40620.1	XOO1138_MAFF	1.03538666666667	rabGAP/TBC domain-containing protein, putative, expressed	enzyme regulator activity,signal transduction,nucleobase, nucleoside, nucleotide and nucleic acid metabolic process,catabolic process	NA	41	934	482	TCCCTAACTAAAACCACACCT	M||||xx|:x||x|xx|||x|	-17.6677	1.35295653288899e-06	110	MAFF311018	66	HD-HD-HD-NG-N*-NG-HD-S*-HG-NI-NI-NN-HD-NN-ND-HD-NI-HD-HG-NG
Os07g03240.1	XOO1138_MAFF	1.00679	RNA recognition motif containing protein, putative, expressed	RNA binding,biological_process	NA	76	962	117	TCCCCCTCTTAACCCCCCCCA	M|||x:||:|||x|x:|x|xx	-18.2468	2.32462531560017e-06	189	MAFF311018	38	HD-HD-HD-NG-N*-NG-HD-S*-HG-NI-NI-NN-HD-NN-ND-HD-NI-HD-HG-NG
Os07g06970.1	Tal9a	5.10111; 2.34639	HEN1, putative, expressed	nucleus,regulation of gene expression, epigenetic,nucleobase, nucleoside, nucleotide and nucleic acid metabolic process,response to stress,response to biotic stimulus,flower development,transferase activity,anatomical structure morphogenesis,cytoplasm	NA	1	1001	185	TCCCTTCCCTAAACCCCACTT	M||||:x||:||x|::|||||	-10.3425	0	0	PXO99; XOO24h	-1	HD-HD-HD-NG-N*-NN-HD-HD-N*-NI-NI-NN-HD-HI-ND-HD-NI-HD-NG-NG
Os11g38810.1	Tal9a	3.63561666666667	mannose-6-phosphate isomerase, putative, expressed	metabolic process,carbohydrate metabolic process,catalytic activity,reproduction,post-embryonic development,embryo development	NA	23	795	214	TCCCTCCCCCAAACACCACGG	M||||:x||:||x|x:|||xx	-16.1729	2.21392887200016e-07	18	PXO99	205	HD-HD-HD-NG-N*-NN-HD-HD-N*-NI-NI-NN-HD-HI-ND-HD-NI-HD-NG-NG
Os07g37400.1	Tal9a	1.98903333333333	OsFBX257 - F-box domain containing protein, expressed	molecular_function,cellular_component,biological_process	F-Box Domain Containing Proteins(F-box proteins)	59	712	1053	CCCCTCGACTCACCCCCACTC	m||||::x|:x|x|::||||x	-17.2423	5.90381032533377e-07	48	PXO99	288	HD-HD-HD-NG-N*-NN-HD-HD-N*-NI-NI-NN-HD-HI-ND-HD-NI-HD-NG-NG
Os02g21700.1	Tal9a	1.94025333333333	STE_MEKK_ste11_MAP3K.8 - STE kinases include homologs to sterile 7, sterile 11 and sterile 20 from yeast, expressed	cellular_component,metabolic process,cellular process,kinase activity,protein binding,nucleotide binding,protein modification process	NA	2	917	236	TCCCTTGCCAAAGCATCACCT	M||||::||x||:|xx|||x|	-12.0338	0	0	PXO99	83	HD-HD-HD-NG-N*-NN-HD-HD-N*-NI-NI-NN-HD-HI-ND-HD-NI-HD-NG-NG
Os05g31670.1	Tal9a	1.65845333333333	AWPM-19-like membrane family protein, putative, expressed	cell,molecular_function,biological_process	NA	46	973	95	TCCCTCCACCAACCAGCACGT	M||||:xx|:||x|xx|||x|	-16.9763	4.18186564711142e-07	34	PXO99	27	HD-HD-HD-NG-N*-NN-HD-HD-N*-NI-NI-NN-HD-HI-ND-HD-NI-HD-NG-NG
Os03g57310.1	Tal9a	1.58583666666667	syntaxin, putative, expressed	protein binding,response to biotic stimulus,cell death,cellular component organization,cellular process,response to stress,signal transduction,plasma membrane,transport,cellular_component,response to endogenous stimulus,membrane	NA	11	1136	166	TCCCTCCCCCCCGCGCCACCT	M||||:x||:xx:|x:|||x|	-15.3472	6.14980242222268e-08	5	PXO99	-136	HD-HD-HD-NG-N*-NN-HD-HD-N*-NI-NI-NN-HD-HI-ND-HD-NI-HD-NG-NG
Os01g72520.1	Tal9a	1.34378	phosphoesterase family protein, putative, expressed	cell,biosynthetic process,cellular process,lipid metabolic process,metabolic process,hydrolase activity	NA	52	1019	44	TCCCCTCCCCACACACCACCT	M|||x:x||:|xx|x:|||x|	-17.057	4.42785774400033e-07	36	PXO99	-19	HD-HD-HD-NG-N*-NN-HD-HD-N*-NI-NI-NN-HD-HI-ND-HD-NI-HD-NG-NG
Os05g34770.1	Tal9a	1.11351666666667	cytochrome c, putative, expressed	molecular_function,binding	NA	16	812	255	TCCCACACCCACACCCCCCTT	M|||x:x||:|xx|::|x|||	-15.5486	9.83968387555629e-08	8	PXO99	188	HD-HD-HD-NG-N*-NN-HD-HD-N*-NI-NI-NN-HD-HI-ND-HD-NI-HD-NG-NG
Os01g33090.1	XOO2864_MAFF	3.23008333333333	expressed protein	nucleotide binding,kinase activity,protein modification process,cell wall,signal transduction,plasma membrane,plastid	NA	93	945	80	GCCCCGGATTGCGCCAAAACAAAACGGAAGCCT	m|||xx:::x:x:xx||:xxx::x|::xx:|||	-36.1532	1.68928811846034e-06	136	MAFF311018	55	HD-HD-HD-NS-N*-NN-NS-N*-NS-NN-NI-NN-NI-HG-NI-NI-NS-HD-NN-HD-NS-NS-NN-HD-NN-NN-NN-NN-NN-HD-HD-NG
Os04g53720.1	XOO2864_MAFF	2.10298666666667; 1.63670333333333	SNF2 family N-terminal domain containing protein, expressed	NA	NA	81	918	1142	CCCCACGCGTCAGCCACACACGAGCGCGCCCCC	m|||:::xxxx|:xx|x:|x|x::|:x:xx||x	-35.9502	1.3539147420013e-06	109	MAFF311018	82	HD-HD-HD-NS-N*-NN-NS-N*-NS-NN-NI-NN-NI-HG-NI-NI-NS-HD-NN-HD-NS-NS-NN-HD-NN-NN-NN-NN-NN-HD-HD-NG
Os05g47960.1	XOO2864_MAFF	2.08795666666667	expressed protein	molecular_function,cellular_component,biosynthetic process,protein modification process	NA	61	815	257	TCCCACGCCACACACACGCGCTCACGGACGAAC	M|||:::x::x|x|x|xx|:|xxx|::xx:xxx	-35.4314	9.93698893211962e-07	80	MAFF311018	185	HD-HD-HD-NS-N*-NN-NS-N*-NS-NN-NI-NN-NI-HG-NI-NI-NS-HD-NN-HD-NS-NS-NN-HD-NN-NN-NN-NN-NN-HD-HD-NG
Os03g58900.1	XOO2864_MAFF	1.66208666666667	galactosyltransferase family protein, putative, expressed	biosynthetic process,protein modification process,carbohydrate metabolic process,metabolic process,carbohydrate binding,transferase activity,plastid	NA	40	849	160	CCACACGCGAAAGAAAAACGCACACAAAAACAC	m|x|:::xx:x|:|x||:|:|:xx|xxxxx|xx	-34.8004	6.58325516752925e-07	53	MAFF311018	151	HD-HD-HD-NS-N*-NN-NS-N*-NS-NN-NI-NN-NI-HG-NI-NI-NS-HD-NN-HD-NS-NS-NN-HD-NN-NN-NN-NN-NN-HD-HD-NG
Os07g38090.1	XOO2864_MAFF	1.00206666666667	zinc finger family protein, putative, expressed	biosynthetic process,nucleobase, nucleoside, nucleotide and nucleic acid metabolic process,sequence-specific DNA binding transcription factor activity,cytoplasm	NA	29	807	686	CCCCCCGAGAGCAAAAAAATCCCCCGACCGCCT	m|||x:::x::xx|x||:xx|xxx|:xxx:|||	-34.4301	4.96849446605981e-07	40	MAFF311018	193	HD-HD-HD-NS-N*-NN-NS-N*-NS-NN-NI-NN-NI-HG-NI-NI-NS-HD-NN-HD-NS-NS-NN-HD-NN-NN-NN-NN-NN-HD-HD-NG
Os10g25550.1	XOCORF_1583	1.122965; 1.1809925	tyrosine protein kinase domain containing protein, putative, expressed	cellular_component,metabolic process,cellular process,kinase activity,response to stress,response to biotic stimulus	NA	5	1001	75	TCATCATCATCCCCCAATT	M|xx|:|:||:x:||:|||	-12.0964	8.59569491987677e-08	7	XOC24h	-1	HD-HD-NC-HD-NC-NG-HH-NI-NG-N*-NS-N*-HD-HD-NS-NI-HG-NG
Os03g03034.1; Os03g03034.3	Tal9b	6.13952333333333; 5.84088666666667	flavonol synthase/flavanone 3-hydroxylase, putative, expressed	cellular_component,response to biotic stimulus,biosynthetic process,cellular process,secondary metabolic process,catalytic activity,metabolic process	NA	24; 25	1015; 887	115	TCCGGCCCCTCTCCCCCCGCCACCTGAC	M||::xx|x|||:|||:xxx|x:||:xx	-26.0494	2.35035040631992e-07	19	PXO99	-15; 113	HD-HD-NN-NN-NG-NG-HD-NS-HG-HD-NG-N*-HD-HD-HD-N*-NN-NI-NN-HD-HI-ND-HD-HG-NN-HG-NG
Os11g05800.1	Tal9b	2.23118	HVA22, putative, expressed	molecular_function,biological_process	NA	61	1064	25	CCCGCCTCTTCTTCCCCACGCTGCGATT	m||:xx||x|||:|||:xx:|xx|xx||	-26.9003	3.71107958892619e-07	30	PXO99	-64	HD-HD-NN-NN-NG-NG-HD-NS-HG-HD-NG-N*-HD-HD-HD-N*-NN-NI-NN-HD-HI-ND-HD-HG-NN-HG-NG
Os03g56610.1	Tal9b	2.05338666666667	expressed protein	molecular_function,Golgi apparatus,biological_process	NA	36	1003	100	TCCGGTCCATCTCCACTCCCCCCACACT	M||::|x|:|||:|x|:xxx|::xxxx|	-26.3464	2.96886367114095e-07	24	PXO99	-3	HD-HD-NN-NN-NG-NG-HD-NS-HG-HD-NG-N*-HD-HD-HD-N*-NN-NI-NN-HD-HI-ND-HD-HG-NN-HG-NG
Os02g49770.1	Tal9b	2.02791	NHL repeat-containing protein, putative, expressed	cell,molecular_function,biological_process	NA	11	850	329	TCCAATGCACCTCACCTCACCACCTGCT	M||xx|x|:x||:x||:x|x|x:||:x|	-24.9301	8.65918570749444e-08	7	PXO99	150	HD-HD-NN-NN-NG-NG-HD-NS-HG-HD-NG-N*-HD-HD-HD-N*-NN-NI-NN-HD-HI-ND-HD-HG-NN-HG-NG
Os06g46366.1	Tal9b	1.33255666666667	zinc finger, C3HC4 type, domain containing protein, expressed	cellular_component,binding,biological_process	NA	2	1047	68	TCCAGTTCTCCTCCCCTGAGCTTCTCCC	M||x:|||xx||:|||::|:|xx||xxx	-21.844	0	0	PXO99	-47	HD-HD-NN-NN-NG-NG-HD-NS-HG-HD-NG-N*-HD-HD-HD-N*-NN-NI-NN-HD-HI-ND-HD-HG-NN-HG-NG
Os06g02180.1	Tal9b	1.01095333333333	CSLD2 - cellulose synthase-like family D, expressed	transferase activity,response to stress,response to abiotic stimulus,biosynthetic process,carbohydrate metabolic process,anatomical structure morphogenesis,cell differentiation,multicellular organismal development,cell growth,membrane,Golgi apparatus,plasma membrane,cellular process	Cellulose Synthase-like Family	98	969	764	TCCATTTCCTCTGCCTACAACTCCTCCT	M||xx|||x|||x||xxx|x|x:||xx|	-27.6857	6.92734856599555e-07	56	PXO99	31	HD-HD-NN-NN-NG-NG-HD-NS-HG-HD-NG-N*-HD-HD-HD-N*-NN-NI-NN-HD-HI-ND-HD-HG-NN-HG-NG
Os03g03034.1; Os03g03034.3	XOO1136_MAFF	6.29816333333333; 5.32290666666667	flavonol synthase/flavanone 3-hydroxylase, putative, expressed	cellular_component,response to biotic stimulus,biosynthetic process,cellular process,secondary metabolic process,catalytic activity,metabolic process	NA	4; 5	1015; 887	115	TCCGGCCCCTCTCCCCCCGCCACCTGAC	M||::xx|:|||:|||:xxx|x:||:x:	-23.3334	2.47405305928413e-08	2	MAFF311018	-15; 113	HD-HD-NN-NN-NS-NG-HD-S*-HG-HD-NG-N*-HD-HD-HD-N*-NN-NI-NN-HD-HI-ND-HD-HG-NN-HG-N*
Os11g05800.1	XOO1136_MAFF	3.47377	HVA22, putative, expressed	molecular_function,biological_process	NA	32	1064	25	CCCGCCTCTTCTTCCCCACGCTGCGATT	m||:xx||:|||:|||:xx:|xx|xx|:	-25.743	1.60813448853468e-07	13	MAFF311018	-64	HD-HD-NN-NN-NS-NG-HD-S*-HG-HD-NG-N*-HD-HD-HD-N*-NN-NI-NN-HD-HI-ND-HD-HG-NN-HG-N*
Os09g03190.1	XOO1136_MAFF	3.10046666666667	expressed protein	NA	NA	40	1003	176	TCCCACTCGTCATCCCTAACCTCCAGCC	M||xxx||x||x:|||:x|x|x:|x:x:	-25.9696	2.47405305928413e-07	20	MAFF311018	-3	HD-HD-NN-NN-NS-NG-HD-S*-HG-HD-NG-N*-HD-HD-HD-N*-NN-NI-NN-HD-HI-ND-HD-HG-NN-HG-N*
Os06g09310.1	XOO1136_MAFF	2.79469	zinc finger, C3HC4 type domain containing protein, expressed	binding	NA	47	930	115	TCCGGCTACTCTCCCCCACGTAGCCGCC	M||::x|x:|||:|||:xx:xxx|x:x:	-26.2138	3.09256632410516e-07	25	MAFF311018	70	HD-HD-NN-NN-NS-NG-HD-S*-HG-HD-NG-N*-HD-HD-HD-N*-NN-NI-NN-HD-HI-ND-HD-HG-NN-HG-N*
Os03g10950.1	XOO1136_MAFF	2.19059	protein phosphatase 2C, putative, expressed	cell,protein modification process,metabolic process,cellular process,catalytic activity,mitochondrion,hydrolase activity	NA	15	846	250	CCCGCGTCTCCTCCCCCGCGCCCCCGCG	m||:xx||:x||:|||::x:|::|x:xx	-24.6457	6.18513264821031e-08	5	MAFF311018	154	HD-HD-NN-NN-NS-NG-HD-S*-HG-HD-NG-N*-HD-HD-HD-N*-NN-NI-NN-HD-HI-ND-HD-HG-NN-HG-N*
Os06g46366.1	XOO1136_MAFF	1.96279333333333	zinc finger, C3HC4 type, domain containing protein, expressed	cellular_component,binding,biological_process	NA	1	1047	68	TCCAGTTCTCCTCCCCTGAGCTTCTCCC	M||x:x||:x||:|||::|:|xx||xx:	-21.3366	0	0	MAFF311018	-47	HD-HD-NN-NN-NS-NG-HD-S*-HG-HD-NG-N*-HD-HD-HD-N*-NN-NI-NN-HD-HI-ND-HD-HG-NN-HG-N*
Os08g28730.1	XOO1136_MAFF	1.75792666666667	NAD dependent epimerase/dehydratase family protein, putative, expressed	metabolic process,response to stress,catalytic activity,protein binding	NA	45	997	236	CCCAACTCCTCTTCCCTGAATCCCTCCT	m||xxx||:|||:|||::|xx::||xx:	-26.1885	3.09256632410516e-07	25	MAFF311018	3	HD-HD-NN-NN-NS-NG-HD-S*-HG-HD-NG-N*-HD-HD-HD-N*-NN-NI-NN-HD-HI-ND-HD-HG-NN-HG-N*
Os02g52000.1	XOO1136_MAFF	1.26602666666667	phosphate-induced protein 1 conserved region domain containing protein, expressed	molecular_function,cell wall,response to endogenous stimulus	NA	18	1027	64	TCCAACACTTCTTCCTTGAGCTCCTTTC	M||xxxx|:|||:||x::|:|x:||x|:	-24.9945	8.65918570749444e-08	7	MAFF311018	-27	HD-HD-NN-NN-NS-NG-HD-S*-HG-HD-NG-N*-HD-HD-HD-N*-NN-NI-NN-HD-HI-ND-HD-HG-NN-HG-N*
Os05g41480.2	XOO1136_MAFF	1.05619333333333	domain of unknown function, DUF250 domain containing protein, expressed	cell,membrane,transport,cellular process,transporter activity	NA	98	1036	43	TCCGCCTCCTCCTCCTCCACCTCCTCCC	M||:xx||:||x:||x:x|x|x:||xx:	-26.9667	4.82440346560404e-07	39	MAFF311018	-36	HD-HD-NN-NN-NS-NG-HD-S*-HG-HD-NG-N*-HD-HD-HD-N*-NN-NI-NN-HD-HI-ND-HD-HG-NN-HG-N*
Os09g29820.1	PthXo6	6.95063; 7.08451666666667	bZIP transcription factor domain containing protein, expressed	DNA binding,protein binding,biosynthetic process,nucleobase, nucleoside, nucleotide and nucleic acid metabolic process,sequence-specific DNA binding transcription factor activity	NA	2	969	112	TATAAAAGGCCCTCACCAACCCAT	M|:|xxx::|x||||:x||x|x:|	-17.4443	0	0	PXO99; PXO99AME1	31	NI-H*-NI-NN-NN-NN-NN-NN-HD-NI-HD-HG-HD-NI-N*-NS-NI-NI-HG-HD-NS-NS-NG
Os08g37456.1	PthXo6	3.62483333333333	flavonol synthase/flavanone 3-hydroxylase, putative, expressed	cellular_component,biosynthetic process,catalytic activity,metabolic process	NA	48	894	1573	CATGTGGGGCCCACATAAATCCCT	m|:xx::::|x|x||::||||xx|	-22.4463	2.86051100316518e-06	232	PXO99AME1	106	NI-H*-NI-NN-NN-NN-NN-NN-HD-NI-HD-HG-HD-NI-N*-NS-NI-NI-HG-HD-NS-NS-NG
Os10g28240.1	PthXo6	3.11360666666667; 3.05397333333333	calcium-transporting ATPase, plasma membrane-type, putative, expressed	transport,cellular process,metabolic process,hydrolase activity,transporter activity,nucleobase, nucleoside, nucleotide and nucleic acid metabolic process,biosynthetic process,catabolic process,protein binding	NA	10	948	167	TATAGGGGGCATATAGGAATCCAT	M|:|:::::||xxx|xx||||x:|	-21.0299	8.75415005278999e-07	71	PXO99; PXO99AME1	52	NI-H*-NI-NN-NN-NN-NN-NN-HD-NI-HD-HG-HD-NI-N*-NS-NI-NI-HG-HD-NS-NS-NG
Os02g49880.1	PthXo6	2.61886666666667	CCT/B-box zinc finger protein, putative, expressed	membrane,biosynthetic process,nucleobase, nucleoside, nucleotide and nucleic acid metabolic process,binding,sequence-specific DNA binding transcription factor activity	NA	49	683	365	TACAGTGGGCCCGCCAAAATCGCT	M|x|:x:::|x|x|xx:||||xx|	-22.4941	2.92215994719891e-06	237	PXO99AME1	317	NI-H*-NI-NN-NN-NN-NN-NN-HD-NI-HD-HG-HD-NI-N*-NS-NI-NI-HG-HD-NS-NS-NG
Os06g48000.1	PthXo6	2.41581; 2.5966; 2.71703666666667; 2.65535	peroxidase precursor, putative, expressed	cell,response to stress,binding,catalytic activity,metabolic process	NA	8	846	130	TATAAACGCCACTCACCGATCGCT	M|:|xxx:x||||||:xx|||xx|	-20.8417	7.76776694825027e-07	63	PXO99; PXO99AME1	154	NI-H*-NI-NN-NN-NN-NN-NN-HD-NI-HD-HG-HD-NI-N*-NS-NI-NI-HG-HD-NS-NS-NG
Os01g45900.1	PthXo6	2.25408666666667; 1.55262	OsFBX20 - F-box domain containing protein, expressed	molecular_function,cellular_component,biological_process	F-Box Domain Containing Proteins(F-box proteins)	7	966	64	TATAAAAGCCACCCACAAAACCCC	M|:|xxx:x|||x||::||x|xxx	-20.6118	6.16489440337323e-07	50	PXO99; PXO99AME1	34	NI-H*-NI-NN-NN-NN-NN-NN-HD-NI-HD-HG-HD-NI-N*-NS-NI-NI-HG-HD-NS-NS-NG
Os05g34170.2	PthXo6	2.22434333333333	tubulin/FtsZ domain containing protein, putative, expressed	response to stress,response to abiotic stimulus,cytoskeleton,cellular process,structural molecule activity,plasma membrane	NA	26	683	838	TACAAGCGGCGAACAAAAATCCAT	M|x|x:x::|xxx||x:||||x:|	-21.6925	1.55355338965005e-06	126	PXO99	317	NI-H*-NI-NN-NN-NN-NN-NN-HD-NI-HD-HG-HD-NI-N*-NS-NI-NI-HG-HD-NS-NS-NG
Os06g04230.1	PthXo6	2.05777	expressed protein	NA	NA	64	1007	54	CAACCCAAGCACACACAAATCAAA	m|xxxxxx:|||x||::||||::x	-22.947	4.30309629355452e-06	349	PXO99	-7	NI-H*-NI-NN-NN-NN-NN-NN-HD-NI-HD-HG-HD-NI-N*-NS-NI-NI-HG-HD-NS-NS-NG
Os04g32620.1	PthXo6	1.90209	ethylene-responsive transcription factor ERF114, putative, expressed	DNA binding,nucleus,response to stress,response to abiotic stimulus,biosynthetic process,nucleobase, nucleoside, nucleotide and nucleic acid metabolic process,response to endogenous stimulus,biological_process,cellular process,sequence-specific DNA binding transcription factor activity	NA	61	1043	431	TAAAGCCATCTCTCATAAAGCCAT	M|x|:xxxx|x||||::||x|x:|	-22.8423	3.89621326293188e-06	316	PXO99	-43	NI-H*-NI-NN-NN-NN-NN-NN-HD-NI-HD-HG-HD-NI-N*-NS-NI-NI-HG-HD-NS-NS-NG
Os08g08960.1	PthXo6	1.7356; 1.43951666666667	Cupin domain containing protein, expressed	cell,extracellular region,molecular_function,biological_process,binding	NA	36	794	231	TAAAGCCCAAACTCAAAAAACTAT	M|x|:xxxxx|||||x:||x|x:|	-22.1257	2.17004282998738e-06	176	PXO99; PXO99AME1	206	NI-H*-NI-NN-NN-NN-NN-NN-HD-NI-HD-HG-HD-NI-N*-NS-NI-NI-HG-HD-NS-NS-NG
Os05g45020.1	PthXo6	1.52321333333333; 1.677	zinc finger/CCCH transcription factor, putative, expressed	biosynthetic process,nucleobase, nucleoside, nucleotide and nucleic acid metabolic process,sequence-specific DNA binding transcription factor activity,nucleic acid binding	NA	84	970	94	TATAAAGGCCACTCGCCACCCACC	M|:|xx::x|||||x:x|xx|:xx	-23.2259	5.46209644138868e-06	443	PXO99; PXO99AME1	30	NI-H*-NI-NN-NN-NN-NN-NN-HD-NI-HD-HG-HD-NI-N*-NS-NI-NI-HG-HD-NS-NS-NG
Os05g05950.1	PthXo6	1.35957333333333	TOC159, putative, expressed	membrane,signal transduction,catabolic process,nucleobase, nucleoside, nucleotide and nucleic acid metabolic process,transport,cellular process,hydrolase activity,protein binding,cytosol,receptor activity,signal transducer activity,plastid	NA	32	790	313	TATAAAGAACACACAAAAAAATAT	M|:|xx:xx|||x||x:||xxx:|	-21.9525	1.9357768426592e-06	157	PXO99AME1	210	NI-H*-NI-NN-NN-NN-NN-NN-HD-NI-HD-HG-HD-NI-N*-NS-NI-NI-HG-HD-NS-NS-NG
Os05g05950.1	PthXo6	1.35957333333333	TOC159, putative, expressed	membrane,signal transduction,catabolic process,nucleobase, nucleoside, nucleotide and nucleic acid metabolic process,transport,cellular process,hydrolase activity,protein binding,cytosol,receptor activity,signal transducer activity,plastid	NA	41	788	315	TATATAAAGAACACACAAAAAAAT	M|:|xxxx:x||x||::||xx::|	-22.2508	2.42896839492905e-06	197	PXO99AME1	212	NI-H*-NI-NN-NN-NN-NN-NN-HD-NI-HD-HG-HD-NI-N*-NS-NI-NI-HG-HD-NS-NS-NG
Os09g29520.1	PthXo6	1.26574	OsWAK81 - OsWAK receptor-like cytoplasmic kinase OsWAK-RLCK, expressed	kinase activity,protein binding,protein modification process,plasma membrane	Oryza sativa Wall-associated Kinases	75	689	588	TACAAGGGCAACCCATACATCACG	M|x|x:::xx||x||::x|||:xx	-23.1154	4.8825963674716e-06	396	PXO99AME1	311	NI-H*-NI-NN-NN-NN-NN-NN-HD-NI-HD-HG-HD-NI-N*-NS-NI-NI-HG-HD-NS-NS-NG
Os11g41170.1	PthXo6	1.12329333333333	disease resistance protein RPM1, putative, expressed	response to stress,cell death,protein binding,nucleotide binding,plasma membrane	NA	69	692	361	TATATGGAGCACGCAAGAATGGAT	M|:|x::x:|||x||xx|||xx:|	-23.0086	4.47571333684897e-06	363	PXO99AME1	308	NI-H*-NI-NN-NN-NN-NN-NN-HD-NI-HD-HG-HD-NI-N*-NS-NI-NI-HG-HD-NS-NS-NG
Os08g09040.1	AvrXa10	4.53943333333333	Cupin domain containing protein, expressed	molecular_function,biological_process,binding	NA	41	949	112	TATATAAACACATAAAT	M||||||x|||x|:xx|	-11.8767	1.17692051514056e-06	96	PXO86	51	NI-HG-NI-HG-NI-NI-NN-HD-NI-HD-NN-HG-NS-NG-HD-NG
Os08g09010.1	AvrXa10	4.05585666666667	Cupin domain containing protein, expressed	molecular_function,biological_process,binding	NA	38	969	117	TATATAAGCACATCAAT	M||||||:|||x|xxx|	-11.8564	1.16466092644118e-06	95	PXO86	31	NI-HG-NI-HG-NI-NI-NN-HD-NI-HD-NN-HG-NS-NG-HD-NG
Os01g43280.1	AvrXa10	3.94836333333333	hydroquinone glucosyltransferase, putative, expressed	transferase activity,cellular_component,metabolic process	NA	6	968	79	TATATAAGCACGTAGCA	M||||||:|||:|:x|x	-10.4494	3.06489717484521e-07	25	PXO86	32	NI-HG-NI-HG-NI-NI-NN-HD-NI-HD-NN-HG-NS-NG-HD-NG
Os12g28590.1	AvrXa10	2.75962666666667	ATPase 2, putative, expressed	endoplasmic reticulum,metabolic process,nucleotide binding,response to endogenous stimulus,catabolic process,nucleobase, nucleoside, nucleotide and nucleic acid metabolic process,hydrolase activity	NA	98	1009	94	TAAACAAGCACACATCC	M|x|x||:|||xx:||x	-12.7676	3.06489717484521e-06	250	PXO86	-9	NI-HG-NI-HG-NI-NI-NN-HD-NI-HD-NN-HG-NS-NG-HD-NG
Os12g41110.1	AvrXa10	2.10751	OsCML5 - Calmodulin-related calcium sensor protein, expressed	binding,biological_process	Rice calmodulin-related calcium sensor proteins	54	963	141	TATATAAGCACCCACCC	M||||||:|||xx:x|x	-12.1467	1.4711506439257e-06	120	PXO86	37	NI-HG-NI-HG-NI-NI-NN-HD-NI-HD-NN-HG-NS-NG-HD-NG
Os08g08960.1	AvrXa10	1.69505	Cupin domain containing protein, expressed	cell,extracellular region,molecular_function,biological_process,binding	NA	22	969	63	TATATAAGCACATCCAT	M||||||:|||x|xxx|	-11.4695	7.60094499361613e-07	62	PXO86	31	NI-HG-NI-HG-NI-NI-NN-HD-NI-HD-NN-HG-NS-NG-HD-NG
Os07g49114.1	AvrXa10	1.15728666666667	wound-induced protein WI12, putative, expressed	molecular_function,cellular_component,response to biotic stimulus,protein binding,response to stress,biological_process	NA	9	969	318	TATAAAAGCACGTCGCT	M|||x||:|||:|xx||	-10.5241	3.55528072282045e-07	29	PXO86	31	NI-HG-NI-HG-NI-NI-NN-HD-NI-HD-NN-HG-NS-NG-HD-NG
Os01g40290.1	XOO2160_MAFF	4.71016666666667	expressed protein	NA	NA	59	968	70	TATATACCTCGTTTCTCCAGGCCGGTAAAAAG	M||||x|x||:||||||||xx|xxxx|xxx:x	-32.6566	5.58495378698961e-07	45	MAFF311018	32	NI-HG-NI-NG-HG-HD-NS-NG-HD-NN-NG-HG-NG-HD-HG-HD-HD-NI-NS-HG-HD-NI-N*-NS-NI-NI-HD-HD-N*-NS-N*
Os03g40270.1	XOO2160_MAFF	1.55313	alpha-1,4-glucan-protein synthase, putative, expressed	membrane,nucleobase, nucleoside, nucleotide and nucleic acid metabolic process,carbohydrate metabolic process,multicellular organismal development,metabolic process,catalytic activity,cellular process,biological_process,cell wall,protein binding,Golgi apparatus,cytosol,response to stress,response to abiotic stimulus,ribosome	NA	70	977	90	TCGCTTCCTCCTCCCCACCCACCCAAACCCAC	Mxxx|||x||x|xx|xx|xxx|x::||||:::	-33.0176	7.19838488100884e-07	58	MAFF311018	23	NI-HG-NI-NG-HG-HD-NS-NG-HD-NN-NG-HG-NG-HD-HG-HD-HD-NI-NS-HG-HD-NI-N*-NS-NI-NI-HD-HD-N*-NS-N*
Os08g34720.1	XOO2160_MAFF	1.199; 1.38115666666667	D-3-phosphoglycerate dehydrogenase, chloroplast precursor, putative, expressed	nucleus,protein binding,cytosol,biosynthetic process,cellular process,metabolic process,catalytic activity,plastid	NA	83	966	140	TCTATTAAAAAATTCCCCAAAAAATAACCCCA	Mx||||x:xxxx|||x|||:xx|xx||||:xx	-33.469	1.04252470690473e-06	84	MAFF311018	34	NI-HG-NI-NG-HG-HD-NS-NG-HD-NN-NG-HG-NG-HD-HG-HD-HD-NI-NS-HG-HD-NI-N*-NS-NI-NI-HD-HD-N*-NS-N*
Os09g24370.1	XOO2160_MAFF	1.05669333333333	expressed protein	NA	NA	65	987	72	TCCTTTCTTCCCTACACCACACACCAACACAC	Mxxx|||x||xx|x|x|||xx||:x|||x:::	-32.9448	6.82605462854286e-07	55	MAFF311018	13	NI-HG-NI-NG-HG-HD-NS-NG-HD-NN-NG-HG-NG-HD-HG-HD-HD-NI-NS-HG-HD-NI-N*-NS-NI-NI-HD-HD-N*-NS-N*
Os12g41690.1	XOO2160_MAFF	1.03234333333333	membrane associated DUF588 domain containing protein, putative, expressed	molecular_function,biological_process	NA	15	740	228	TTCATTCCTCAATTCCCCATCCCCAACCCACC	Mxx||||x||xx|||x|||xx|x::|x||xx:	-30.5905	1.11699075739792e-07	9	MAFF311018	260	NI-HG-NI-NG-HG-HD-NS-NG-HD-NN-NG-HG-NG-HD-HG-HD-HD-NI-NS-HG-HD-NI-N*-NS-NI-NI-HD-HD-N*-NS-N*
Os12g31540.1	XOO2160_MAFF	1.03150333333333	expressed protein	molecular_function,transport,cellular process,post-embryonic development,plasma membrane	NA	41	748	407	TACCTCCACTTTTCATCCAATCACAACCCTCT	M|xx|x|:xxx||xx||||:|||::|x||:x:	-32.0192	3.22686218803844e-07	26	MAFF311018	252	NI-HG-NI-NG-HG-HD-NS-NG-HD-NN-NG-HG-NG-HD-HG-HD-HD-NI-NS-HG-HD-NI-N*-NS-NI-NI-HD-HD-N*-NS-N*
Os12g31540.1	XOO2160_MAFF	1.03150333333333	expressed protein	molecular_function,transport,cellular process,post-embryonic development,plasma membrane	NA	80	697	458	AATATTCTATTCTTAACCAATCACAACCCTCC	m||||||xxxxx||xx|||:|||::|x||:x:	-33.4094	1.00529168165813e-06	81	MAFF311018	303	NI-HG-NI-NG-HG-HD-NS-NG-HD-NN-NG-HG-NG-HD-HG-HD-HD-NI-NS-HG-HD-NI-N*-NS-NI-NI-HD-HD-N*-NS-N*
Os02g03560.1	XOO2160_MAFF	1.00217666666667	expressed protein	molecular_function,mitochondrion,biological_process	NA	94	1030	128	CCGCTGCCTCGTTTACCCAAACCCAAACACCA	mxxx|x|x||:|||xx|||:x|x::|||x:xx	-33.6062	1.09216874056686e-06	88	MAFF311018	-30	NI-HG-NI-NG-HG-HD-NS-NG-HD-NN-NG-HG-NG-HD-HG-HD-HD-NI-NS-HG-HD-NI-N*-NS-NI-NI-HD-HD-N*-NS-N*
Os01g33090.1	XOO2866_MAFF	3.23008333333333	expressed protein	nucleotide binding,kinase activity,protein modification process,cell wall,signal transduction,plasma membrane,plastid	NA	30	823	207	CAAAACCCCCCAAAACCCAAGCGCACAC	m|x||x|x|||||x||||xx:|xxxx::	-26.8874	2.96886367114095e-07	24	MAFF311018	177	NI-HG-NI-NI-HG-HD-NN-HD-HD-HD-NI-NI-NN-NI-HD-HD-HD-HG-NN-NN-HD-NS-NN-HD-NG-NS-N*
Os12g12080.1	XOO2866_MAFF	2.72004	retrotransposon protein, putative, Ty3-gypsy subclass, expressed	NA	NA	69	806	290	CCCAGCCGCCCAACTCCCTGGCAGCCGA	mxx|xx|:|||||xx||||::|::|xxx	-28.0266	7.66956448378079e-07	62	MAFF311018	194	NI-HG-NI-NI-HG-HD-NN-HD-HD-HD-NI-NI-NN-NI-HD-HD-HD-HG-NN-NN-HD-NS-NN-HD-NG-NS-N*
Os04g55800.1	XOO2866_MAFF	2.14238666666667	sulfate transporter, putative, expressed	transport,membrane,cellular process,transporter activity	NA	5	1040	83	TATACACACCCCAAACCCTCCTAGCTCT	M|||xx|x|||x|x|||||xxx::||x:	-24.611	8.65918570749444e-08	7	MAFF311018	-40	NI-HG-NI-NI-HG-HD-NN-HD-HD-HD-NI-NI-NN-NI-HD-HD-HD-HG-NN-NN-HD-NS-NN-HD-NG-NS-N*
Os12g41110.1	XOO2866_MAFF	1.83022666666667; 4.09782333333333	OsCML5 - Calmodulin-related calcium sensor protein, expressed	binding,biological_process	Rice calmodulin-related calcium sensor proteins	87	965	128	TATAAGCACCCACCCCCCTCTCTCCCCC	M||||x|x||||xxx||||xx|xx|xx:	-28.4808	9.52510427824388e-07	77	MAFF311018	35	NI-HG-NI-NI-HG-HD-NN-HD-HD-HD-NI-NI-NN-NI-HD-HD-HD-HG-NN-NN-HD-NS-NN-HD-NG-NS-N*
Os08g35860.1	XOO2866_MAFF	1.34200333333333	cytokinin dehydrogenase precursor, putative, expressed	catalytic activity,cellular_component,cellular process,catabolic process,metabolic process	NA	13	970	144	TATAAACTCCCAGGACCCAAACTACCAC	M||||x|x||||x:||||xxx|xx|x::	-25.4139	9.8962122371365e-08	8	MAFF311018	30	NI-HG-NI-NI-HG-HD-NN-HD-HD-HD-NI-NI-NN-NI-HD-HD-HD-HG-NN-NN-HD-NS-NN-HD-NG-NS-N*
Os01g61080.1	XOO2866_MAFF	1.20423	OsWRKY24 - Superfamily of TFs having WRKY and zinc finger domains, expressed	response to stress,response to abiotic stimulus,biosynthetic process,nucleobase, nucleoside, nucleotide and nucleic acid metabolic process,response to biotic stimulus,cellular process,biological_process,protein binding,sequence-specific DNA binding transcription factor activity,secondary metabolic process,nucleus,catabolic process	Oryza sativa WRKY Gene Superfamily	2	787	323	TCTATCCGCCAAAAACCCTACCCGCTCC	Mx||xx|:||x||x|||||xx|x:||x:	-23.0155	3.71107958892619e-08	3	MAFF311018	213	NI-HG-NI-NI-HG-HD-NN-HD-HD-HD-NI-NI-NN-NI-HD-HD-HD-HG-NN-NN-HD-NS-NN-HD-NG-NS-N*
Os01g03130.1	XOO1998_MAFF	3.68887666666667; 1.7616	expressed protein	molecular_function,biological_process	NA	28	971	174	TATAAACCCAAGCAACCAGCC	M|||||x|xx::|x||x|x|x	-18.0797	1.89413914604459e-06	154	MAFF311018	29	NI-HG-NI-NI-NI-NN-HD-NS-NN-NS-NN-HD-NN-NI-HD-NN-NI-NG-HD-NG
Os01g42030.1	XOO1998_MAFF	3.14862666666667	mitochondrial chaperone BCS1, putative, expressed	metabolic process,nucleotide binding,hydrolase activity,catabolic process,nucleobase, nucleoside, nucleotide and nucleic acid metabolic process,mitochondrion	NA	58	967	153	TATAAAACCGGGAGCCCAGCT	M|||||x|x:x:x:x|x|x||	-18.9855	4.00967117928919e-06	326	MAFF311018	33	NI-HG-NI-NI-NI-NN-HD-NS-NN-NS-NN-HD-NN-NI-HD-NN-NI-NG-HD-NG
Os07g03730.1	XOO1998_MAFF	2.74171666666667	SCP-like extracellular protein, expressed	molecular_function,extracellular region,biological_process	NA	30	759	309	TATAACACATGGCAATGATCT	M||||xx|:xx:|x|x:||||	-18.2354	2.16473045262238e-06	176	MAFF311018	241	NI-HG-NI-NI-NI-NN-HD-NS-NN-NS-NN-HD-NN-NI-HD-NN-NI-NG-HD-NG
Os02g37160.1	XOO1998_MAFF	2.66371333333333	heavy metal transport/detoxification protein, putative, expressed	binding,mitochondrion	NA	66	844	329	CACAAAGCCGAGCCAAAGTCT	m|x|||:|x:::|x|xxx|||	-19.0853	4.29256209071143e-06	349	MAFF311018	156	NI-HG-NI-NI-NI-NN-HD-NS-NN-NS-NN-HD-NN-NI-HD-NN-NI-NG-HD-NG
Os02g49240.1	XOO1998_MAFF	1.93880333333333	expressed protein	NA	NA	24	873	245	TAAAAAAAAAAGAGAAAATCT	M|x|||xx:x::x:|xx||||	-18.0372	1.85724033151125e-06	151	MAFF311018	127	NI-HG-NI-NI-NI-NN-HD-NS-NN-NS-NN-HD-NN-NI-HD-NN-NI-NG-HD-NG
Os08g07760.1	XOO1998_MAFF	1.79207	BRASSINOSTEROID INSENSITIVE 1-associated receptor kinase 1 precursor, putative, expressed	metabolic process,cellular process,receptor binding,kinase activity,protein modification process,multicellular organismal development,plasma membrane,cell cycle	NA	1	1008	255	TATAAAGCGAGGCGACGAACT	M|||||:|xxx:|:||:|x||	-12.9963	1.22996048444454e-08	1	MAFF311018	-8	NI-HG-NI-NI-NI-NN-HD-NS-NN-NS-NN-HD-NN-NI-HD-NN-NI-NG-HD-NG
Os06g10530.1	XOO1998_MAFF	1.75011333333333	expressed protein	cell,molecular_function,biological_process	NA	33	973	122	TAAAAACCAAACCCAAGAACT	M|x|||x|:x:x|x|x:|x||	-18.265	2.21392887200016e-06	180	MAFF311018	27	NI-HG-NI-NI-NI-NN-HD-NS-NN-NS-NN-HD-NN-NI-HD-NN-NI-NG-HD-NG
Os03g03410.1	XOO1998_MAFF	1.22977666666667	serine/threonine-protein kinase, putative, expressed	metabolic process,cellular process,kinase activity,plasma membrane,protein modification process	NA	43	1020	77	TGTAAAGCAGAGCGACCAAAG	Mx||||:|::::|:||x|xxx	-18.5651	2.73051227546687e-06	222	MAFF311018	-20	NI-HG-NI-NI-NI-NN-HD-NS-NN-NS-NN-HD-NN-NI-HD-NN-NI-NG-HD-NG
Os03g14380.1	XOO1998_MAFF	1.13019666666667; 1.01096333333333	autophagy protein 9, putative, expressed	catabolic process,cellular process	NA	97	827	1231	TATATAGCAGTACGACGAAAC	M|||x|:|::xx|:||:|xxx	-19.4817	6.08830439800045e-06	495	MAFF311018	173	NI-HG-NI-NI-NI-NN-HD-NS-NN-NS-NN-HD-NN-NI-HD-NN-NI-NG-HD-NG
Os02g52160.1	XOO1998_MAFF	1.06482; 1.41797	LMBR1 integral membrane protein, putative, expressed	molecular_function,membrane,biological_process	NA	8	1127	157	GACAAACCAGGGCGCCGATCT	m|x|||x|::x:|:x|:||||	-16.4709	4.67384984088924e-07	38	MAFF311018	-127	NI-HG-NI-NI-NI-NN-HD-NS-NN-NS-NN-HD-NN-NI-HD-NN-NI-NG-HD-NG
Os04g05050.1	Tal7a; Tal8a	5.47911666666667; 4.89116	pectate lyase precursor, putative, expressed	cell,catalytic activity,metabolic process,biological_process	NA	41	878	103	TATAAATCGGCGCGGCGCT	M|||||x|x:x:|:x|:x|	-15.5107	2.34539675670923e-06; 2.33311719253798e-06	191; 190	PXO99	122	NI-HG-NI-NI-NI-NN-HD-NS-NN-NS-NN-HD-NN-NI-HD-NN-NS-NG
Os08g07760.1	Tal7a; Tal8a	2.75136333333333	BRASSINOSTEROID INSENSITIVE 1-associated receptor kinase 1 precursor, putative, expressed	metabolic process,cellular process,receptor binding,kinase activity,protein modification process,multicellular organismal development,plasma membrane,cell cycle	NA	4	1008	257	TATAAAGCGAGGCGACGAA	M|||||:|xxx:|:||::x	-12.94	9.82365133700202e-08; 1.22795641712525e-07	8; 10	PXO99	-8	NI-HG-NI-NI-NI-NN-HD-NS-NN-NS-NN-HD-NN-NI-HD-NN-NS-NG
Os06g21910.1	Tal7a; Tal8a	2.09768666666667	late embryogenesis abundant group 1, putative, expressed	NA	NA	3	969	104	TATAAATCGAAACGACGAT	M|||||x|xx:x|:||::|	-12.7652	7.36773850275151e-08; 9.82365133700202e-08	6; 8	PXO99	31	NI-HG-NI-NI-NI-NN-HD-NS-NN-NS-NN-HD-NN-NI-HD-NN-NS-NG
Os01g03130.1	Tal7a; Tal8a	2.08376	expressed protein	molecular_function,biological_process	NA	56	971	176	TATAAACCCAAGCAACCAG	M|||||x|xx::|x||x:x	-15.8801	3.34004145458069e-06; 3.58563273800574e-06	272; 292	PXO99	29	NI-HG-NI-NI-NI-NN-HD-NS-NN-NS-NN-HD-NN-NI-HD-NN-NS-NG
Os10g02840.1	Tal7a; Tal8a	1.63941	O-methyltransferase, putative, expressed	transferase activity,biosynthetic process,cellular process,secondary metabolic process,cytosol,metabolic process	NA	48	807	653	TAGAAAAAAAAACCACGAT	M|x|||xx:x:x|x||::|	-15.7122	2.81202019521683e-06; 3.02077278612812e-06	229; 246	PXO99	193	NI-HG-NI-NI-NI-NN-HD-NS-NN-NS-NN-HD-NN-NI-HD-NN-NS-NG
Os05g50750.1	Tal7a; Tal8a	1.51918666666667	AAA family ATPase, putative, expressed	cell,metabolic process,nucleotide binding,hydrolase activity,biological_process	NA	51	969	139	TATAAACCCCACCAACCCT	M|||||x|xx:x|x||xx|	-15.7283	2.84885888773058e-06; 3.04533191447063e-06	232; 248	PXO99	31	NI-HG-NI-NI-NI-NN-HD-NS-NN-NS-NN-HD-NN-NI-HD-NN-NS-NG
Os08g30770.1	Tal7a; Tal8a	1.48737	ABC transporter, ATP-binding protein, putative, expressed	transport,cellular process,cellular_component,hydrolase activity,transporter activity,catabolic process,nucleobase, nucleoside, nucleotide and nucleic acid metabolic process,plasma membrane	NA	21	966	52	TATAAAGCCCGGAGACGAA	M|||||:|xxx:x:||::x	-14.9199	1.2402359812965e-06; 1.28935423798151e-06	101; 105	PXO99	34	NI-HG-NI-NI-NI-NN-HD-NS-NN-NS-NN-HD-NN-NI-HD-NN-NS-NG
Os03g03410.1	Tal7a; Tal8a	1.36254666666667	serine/threonine-protein kinase, putative, expressed	metabolic process,cellular process,kinase activity,plasma membrane,protein modification process	NA	5	1020	79	TGTAAAGCAGAGCGACCAA	Mx||||:|::::|:||x:x	-13.0925	1.35075205883778e-07; 1.84193462568788e-07	11; 15	PXO99	-20	NI-HG-NI-NI-NI-NN-HD-NS-NN-NS-NN-HD-NN-NI-HD-NN-NS-NG
Os06g14780.1	AvrXa7	1.14756333333333	expressed protein	molecular_function,cellular_component,biological_process	NA	6	815	305	TACAAACCCCCTTGCAAAGGAAGAAAA	M|x||:|x|||x:x|x::::|x:|x:x	-24.2069	1.73041697919748e-07	14	PXO86	185	NI-HG-NI-NI-NS-HD-NN-HD-HD-HD-NS-N*-N*-HD-HD-NS-NS-NN-NN-NI-NG-NN-NI-N*-NS-N*
Os03g48660.1	AvrXa7	1.05017333333333; 1.06409	DUF1336 domain containing protein, expressed	molecular_function,biosynthetic process,protein modification process,plasma membrane	NA	36	1008	234	AACAAAAGCCCAGCCCAAAGCCAACGC	m|x||:x:|||:x:||::x:xxx|:x:	-26.4872	1.55737528127774e-06	126	PXO86	-8	NI-HG-NI-NI-NS-HD-NN-HD-HD-HD-NS-N*-N*-HD-HD-NS-NS-NN-NN-NI-NG-NN-NI-N*-NS-N*
Os05g31620.1	XOO2868_MAFF	3.05303666666667	OsCML15 - Calmodulin-related calcium sensor protein, expressed	nucleus,response to stress,response to abiotic stimulus,binding,anatomical structure morphogenesis,cell differentiation,multicellular organismal development,cell growth,cytoplasm	Rice calmodulin-related calcium sensor proteins	65	970	104	TATAATCCCCCACCCCGCGCCTCTCCC	M||||x|x|||:::||xx:xx|xx:xx	-27.1317	3.20127141151534e-06	259	MAFF311018	30	NI-HG-NI-NI-NS-HD-NN-HD-HD-HD-NS-N*-N*-HD-HD-NS-NS-NN-NN-NI-NG-NN-NI-N*-NS-NG
Os05g34500.1	XOO2868_MAFF	1.78178666666667	expressed protein	NA	NA	88	996	49	CACCAACGCCAACGCCAAGGCCCATTT	m|xx|:|:||x::x||::::xxx|:x|	-27.5017	4.10356026495403e-06	332	MAFF311018	4	NI-HG-NI-NI-NS-HD-NN-HD-HD-HD-NS-N*-N*-HD-HD-NS-NS-NN-NN-NI-NG-NN-NI-N*-NS-NG
Os12g29400.1	XOO2868_MAFF	1.77303666666667	GRAM domain containing protein, expressed	molecular_function,biological_process	Rice Kinase Interactome	19	865	108	TATAAAAACCCATCACACCGCTCATCC	M||||:xx|||:::x|:xx:x|x|:xx	-25.7783	1.06297043007845e-06	86	MAFF311018	135	NI-HG-NI-NI-NS-HD-NN-HD-HD-HD-NS-N*-N*-HD-HD-NS-NS-NN-NN-NI-NG-NN-NI-N*-NS-NG
Os03g47820.1	XOO2868_MAFF	1.69202333333333	PINHEAD, putative, expressed	response to endogenous stimulus,response to stress,response to biotic stimulus,anatomical structure morphogenesis,multicellular organismal development,cytoplasm,nuclease activity,regulation of gene expression, epigenetic,cellular process,cell differentiation,protein binding,response to abiotic stimulus,cytosol,RNA binding,nucleus,metabolic process,reproduction,post-embryonic development,embryo de…	NA	49	905	68	TATAAACGCCGCCTCCTCCGCTAACCC	M||||:|:||xx::||xxx:x|x|:xx	-26.726	2.43494389215646e-06	197	MAFF311018	95	NI-HG-NI-NI-NS-HD-NN-HD-HD-HD-NS-N*-N*-HD-HD-NS-NS-NN-NN-NI-NG-NN-NI-N*-NS-NG
Os06g14780.1	XOO2868_MAFF	1.50285333333333	expressed protein	molecular_function,cellular_component,biological_process	NA	9	815	305	TACAAACCCCCTTGCAAAGGAAGAAAA	M|x||:|x|||x:x|x::::|x:|x:x	-24.9715	5.31485215039227e-07	43	MAFF311018	185	NI-HG-NI-NI-NS-HD-NN-HD-HD-HD-NS-N*-N*-HD-HD-NS-NS-NN-NN-NI-NG-NN-NI-N*-NS-NG
Os05g40040.1	XOO2868_MAFF	1.13173	expressed protein	molecular_function,biological_process	NA	63	908	399	CCAAACCACCAAACCCAAAGACCAAAT	mxx||x|x||x:x:||::x:|xx|x:|	-27.0769	3.05294995615556e-06	247	MAFF311018	92	NI-HG-NI-NI-NS-HD-NN-HD-HD-HD-NS-N*-N*-HD-HD-NS-NS-NN-NN-NI-NG-NN-NI-N*-NS-NG
Os09g21380.1	XOO2868_MAFF	1.02520666666667	expressed protein	molecular_function,cellular_component,biosynthetic process,protein modification process	NA	48	932	216	AAACAAAGCCCAATCCAAAACTAAAAT	m|xx|:x:|||:x:||::xxx|x|x:|	-26.7085	2.39786352831651e-06	194	MAFF311018	68	NI-HG-NI-NI-NS-HD-NN-HD-HD-HD-NS-N*-N*-HD-HD-NS-NS-NN-NN-NI-NG-NN-NI-N*-NS-NG
Os02g30910.1	Tal7b; Tal8b	4.25174	nodulin MtN3 family protein, putative, expressed	cell,membrane,transport,cellular process,plasma membrane,transporter activity,biological_process	NA	91	1035	141	GCTCCTCCTCCTTTCTCCACT	mx|xx||x||x||||||||x|	-18.5317	3.34549251768914e-06; 3.49308777582248e-06	272; 284	PXO99	-35	NI-HG-NS-HG-HG-HD-NS-NG-HD-NN-NG-HG-NG-HD-HG-HD-HD-NI-NN-NG
Os01g40290.1	Tal7b; Tal8b; Tal7b; Tal8b	3.77525333333333; 3.77525333333333; 1.0459225; 1.0459225	expressed protein	NA	NA	1	968	81	TATATACCTCGTTTCTCCAGG	M||:|x|x||:||||||||:x	-12.0523	0; 1.22996048444454e-08; 0; 1.22996048444454e-08	0; 1; 0; 1	PXO99; PXO99; XOO24h; XOO24h	32	NI-HG-NS-HG-HG-HD-NS-NG-HD-NN-NG-HG-NG-HD-HG-HD-HD-NI-NN-NG
Os03g02070.1	Tal7b; Tal8b	2.08844333333333	heavy-metal-associated domain-containing protein, putative, expressed	cellular_component,binding	NA	44	1062	7	TATATCCACAGTTTCAACACT	M||:|x|:xx:||||xx||x|	-17.7711	1.63584744431123e-06; 1.75884349275569e-06	133; 143	PXO99	-62	NI-HG-NS-HG-HG-HD-NS-NG-HD-NN-NG-HG-NG-HD-HG-HD-HD-NI-NN-NG
Os04g37670.1	Tal7b; Tal8b	1.41441	steroid nuclear receptor, ligand-binding, putative, expressed	cell,molecular_function,biological_process	NA	14	970	495	TATCTTCCCTGTCTCTCCAAT	M||x|||xxx:|x||||||x|	-16.4118	4.42785774400033e-07; 5.41182613155596e-07	36; 44	PXO99	30	NI-HG-NS-HG-HG-HD-NS-NG-HD-NN-NG-HG-NG-HD-HG-HD-HD-NI-NN-NG
Os06g46366.1	Tal7b; Tal8b	1.33255666666667	zinc finger, C3HC4 type, domain containing protein, expressed	cellular_component,binding,biological_process	NA	13	1032	90	CAAAAACGTCCTTTCTCCAGT	m|x:xx|x||x||||||||:|	-16.2111	4.05886959866697e-07; 4.79684588933369e-07	33; 39	PXO99	-32	NI-HG-NS-HG-HG-HD-NS-NG-HD-NN-NG-HG-NG-HD-HG-HD-HD-NI-NN-NG
Os07g48100.1	Tal7b; Tal8b	1.20563333333333; 1.24824333333333; 1.24824333333333; 1.20563333333333	CAMK_KIN1/SNF1/Nim1_like.31 - CAMK includes calcium/calmodulin depedent protein kinases, expressed	metabolic process,cellular process,signal transduction,kinase activity,nucleotide binding,protein modification process	Rice Kinase Interactome	36	767	1417	TATCATCATCATTCCACTAGT	M||xx||:||x||x|x|x|:|	-17.4387	1.25455969413343e-06; 1.27915890382232e-06	102; 104	PXO99	233	NI-HG-NS-HG-HG-HD-NS-NG-HD-NN-NG-HG-NG-HD-HG-HD-HD-NI-NN-NG
Os09g33690.1	Tal7b; Tal8b	1.18786333333333	Os9bglu32 - beta-glucosidase homologue, similar to G. max hydroxyisourate hydrolase, expressed	binding,hydrolase activity,metabolic process,carbohydrate metabolic process,catalytic activity	Glycosyl Hydrolase Family 1 Beta-Glucosidases	94	975	79	TCTCTCCTTCCACTCTCCAGT	Mx|x|x|x||xxx||||||:|	-18.6332	3.65298263880027e-06; 3.70218105817805e-06	297; 301	PXO99	25	NI-HG-NS-HG-HG-HD-NS-NG-HD-NN-NG-HG-NG-HD-HG-HD-HD-NI-NN-NG
Os11g45740.1	XOO2127_MAFF	4.91876	MYB family transcription factor, putative, expressed	DNA binding,biosynthetic process,nucleobase, nucleoside, nucleotide and nucleic acid metabolic process,response to stress,response to abiotic stimulus,sequence-specific DNA binding transcription factor activity,response to endogenous stimulus	NA	75	792	329	TACATTAACACGTGCCACAGAA	M|:||x|:|x|x|x|x|x|::x	-19.6365	3.39746332586056e-06	276	MAFF311018	208	NI-N*-NI-HG-NI-NI-NS-HD-NN-HD-NS-NG-SS-HD-NI-NI-NN-NI-NN-NS-NG
Os01g50370.1	XOO2127_MAFF	4.48309666666667	STE_MEKK_ste11_MAP3K.4 - STE kinases include homologs to sterile 7, sterile 11 and sterile 20 from yeast, expressed	cellular_component,metabolic process,cellular process,kinase activity,protein binding,nucleotide binding,protein modification process	NA	1	969	142	TATATAAACGCACACAAGCGCT	M|:||||:|:|:x:|||:x:x|	-13.611	0	0	MAFF311018	31	NI-N*-NI-HG-NI-NI-NS-HD-NN-HD-NS-NG-SS-HD-NI-NI-NN-NI-NN-NS-NG
Os08g13440.1	XOO2127_MAFF	4.02291	cupin domain containing protein, expressed	molecular_function,biological_process,binding	NA	88	970	93	TATAAAATCACATGCAACCCCT	M|:|x||x|x|:|x|||xxxx|	-19.8425	4.08680371081777e-06	332	MAFF311018	30	NI-N*-NI-HG-NI-NI-NS-HD-NN-HD-NS-NG-SS-HD-NI-NI-NN-NI-NN-NS-NG
Os03g29240.1	XOO2127_MAFF	3.00857	PDI, putative, expressed	pollination,response to external stimulus,multicellular organismal development,metabolic process,cellular component organization,anatomical structure morphogenesis,cell differentiation,cell growth,molecular_function,biological_process,cytosol,catalytic activity	NA	85	725	323	CATAACCACGCATGCAAGAATT	m|:|xxx:|:|:|x|||:|xx|	-19.8021	3.88984931511571e-06	316	MAFF311018	275	NI-N*-NI-HG-NI-NI-NS-HD-NN-HD-NS-NG-SS-HD-NI-NI-NN-NI-NN-NS-NG
Os04g44320.1	XOO2127_MAFF	1.49072	transposon protein, putative, unclassified, expressed	NA	NA	62	848	255	TAAATACACTCGATCAAGACAT	M|x|||x:|x|xx:|||:|x:|	-19.4568	2.85583873767989e-06	232	MAFF311018	152	NI-N*-NI-HG-NI-NI-NS-HD-NN-HD-NS-NG-SS-HD-NI-NI-NN-NI-NN-NS-NG
Os05g10620.1	XOO2127_MAFF	1.36273	no apical meristem protein, putative, expressed	biosynthetic process,nucleobase, nucleoside, nucleotide and nucleic acid metabolic process,multicellular organismal development,sequence-specific DNA binding transcription factor activity	NA	63	969	62	TATATAAATGGATCCAAGCAAT	M|:||||:x:x:|x|||:xx:|	-19.462	2.85583873767989e-06	232	MAFF311018	31	NI-N*-NI-HG-NI-NI-NS-HD-NN-HD-NS-NG-SS-HD-NI-NI-NN-NI-NN-NS-NG
Os11g05860.1	XOO2127_MAFF	1.23834333333333	harpin-induced protein 1 domain containing protein, expressed	molecular_function,cellular_component,biological_process	NA	96	925	230	TAAACAAACCCACAAAAGAAAA	M|x|x||:|x|:x:x||:|x:x	-19.9791	4.76383444604361e-06	387	MAFF311018	75	NI-N*-NI-HG-NI-NI-NS-HD-NN-HD-NS-NG-SS-HD-NI-NI-NN-NI-NN-NS-NG
Os07g46570.1	XOO2127_MAFF	1.21599333333333	glutaredoxin, putative, expressed	catalytic activity,molecular_function,metabolic process,cellular homeostasis	NA	82	970	136	TATATATACGCATCCACTAAAC	M|:|||x:|:|:|x||xx|x:x	-19.7494	3.70520456914503e-06	301	MAFF311018	30	NI-N*-NI-HG-NI-NI-NS-HD-NN-HD-NS-NG-SS-HD-NI-NI-NN-NI-NN-NS-NG
Os04g01520.1	XOO2127_MAFF	1.12391	expressed protein	molecular_function,cellular_component,transport,cellular process	NA	10	971	85	TATATAAACCCATGGAGGAGAT	M|:||||:|x|:|xx|x:|::|	-17.7495	6.40101786031699e-07	52	MAFF311018	29	NI-N*-NI-HG-NI-NI-NS-HD-NN-HD-NS-NG-SS-HD-NI-NI-NN-NI-NN-NS-NG
Os03g55980.1	XOO2158_MAFF	2.81057	expressed protein	molecular_function,biological_process,plasma membrane	NA	30	965	70	TATAAGAGGCAGCCCTACCCT	M|:|::x:x:::x:||xx|||	-17.8003	1.53745060555567e-06	125	MAFF311018	35	NI-N*-NI-NS-NN-NG-NN-NS-N*-NS-NN-NS-N*-HD-HG-HD-NI-HD-HD-NG
Os03g16940.1	XOO2158_MAFF	2.36291	glyoxalase family protein, putative, expressed	cell,metabolic process,catalytic activity	NA	74	920	59	CATACGTGACAGGCCTTACAT	m|:|x:|:::::x:||x||x|	-18.6343	3.5791850097336e-06	291	MAFF311018	80	NI-N*-NI-NS-NN-NG-NN-NS-N*-NS-NN-NS-N*-HD-HG-HD-NI-HD-HD-NG
Os10g36848.1	XOO2158_MAFF	2.29742	cytochrome P450, putative, expressed	endoplasmic reticulum,biosynthetic process,cellular process,secondary metabolic process,catalytic activity,metabolic process,response to abiotic stimulus	NA	50	964	171	TAAAAATATCATTCCTCACCT	M|x|:x|xx::xx:|||||||	-18.1972	2.33692492044462e-06	190	MAFF311018	36	NI-N*-NI-NS-NN-NG-NN-NS-N*-NS-NN-NS-N*-HD-HG-HD-NI-HD-HD-NG
Os03g55960.1	XOO2158_MAFF	2.27433333333333	EF hand family protein, putative, expressed	binding,biological_process,plastid	NA	26	967	104	TATAAATGGAGGAGCACACCT	M|:|:x|:xxx::x|x|||||	-17.6178	1.27915890382232e-06	104	MAFF311018	33	NI-N*-NI-NS-NN-NG-NN-NS-N*-NS-NN-NS-N*-HD-HG-HD-NI-HD-HD-NG
Os06g29790.1	XOO2158_MAFF	2.03809666666667	phosphate transporter 1, putative, expressed	molecular_function,transport,response to extracellular stimulus,cell communication,response to stress,membrane	NA	1	686	332	TATAAGTGACAGCCCTCCCCT	M|:|::|:::::x:|||x|||	-11.3011	0	0	MAFF311018	314	NI-N*-NI-NS-NN-NG-NN-NS-N*-NS-NN-NS-N*-HD-HG-HD-NI-HD-HD-NG
Os03g40610.1	XOO2158_MAFF	1.56435333333333	cytochrome P450, putative, expressed	growth,molecular_function,binding,endoplasmic reticulum,flower development,anatomical structure morphogenesis,multicellular organismal development,metabolic process,oxygen binding,catalytic activity,cellular process	NA	2	842	137	TATAAATAACAGGTCTCCCCT	M|:|:x|x::::x:|||x|||	-15.0341	8.60972339111175e-08	7	MAFF311018	158	NI-N*-NI-NS-NN-NG-NN-NS-N*-NS-NN-NS-N*-HD-HG-HD-NI-HD-HD-NG
Os09g26840.1	XOO2158_MAFF	1.33580333333333	expressed protein	molecular_function,cellular_component,biological_process	NA	17	1142	100	TACAAGTCTTACATCTCTCCT	M|:|::|xx::x::|||x|||	-17.1794	9.10170758488957e-07	74	MAFF311018	-142	NI-N*-NI-NS-NN-NG-NN-NS-N*-NS-NN-NS-N*-HD-HG-HD-NI-HD-HD-NG
Os04g01310.1	XOO2158_MAFF	1.10049666666667	serine/threonine-protein kinase receptor precursor, putative, expressed	cell,kinase activity,nucleotide binding,carbohydrate binding,pollen-pistil interaction,protein modification process	Rice Kinase Interactome	19	968	142	TAAAAGTGGCCACCCCCACCC	M|x|::|:x:xxx:|x||||x	-17.2748	1.02086720208897e-06	83	MAFF311018	32	NI-N*-NI-NS-NN-NG-NN-NS-N*-NS-NN-NS-N*-HD-HG-HD-NI-HD-HD-NG
Os07g49114.1	XOO2158_MAFF	1.06853333333333	wound-induced protein WI12, putative, expressed	molecular_function,cellular_component,response to biotic stimulus,protein binding,response to stress,biological_process	NA	80	886	397	CACCCGCAACCGACCCCACCT	m|:xx:xx::x:::|x|||||	-18.7532	3.9850719696003e-06	324	MAFF311018	114	NI-N*-NI-NS-NN-NG-NN-NS-N*-NS-NN-NS-N*-HD-HG-HD-NI-HD-HD-NG
Os11g26790.1	XOO2158_MAFF	1.06577666666667; 1.84779666666667	dehydrin, putative, expressed	molecular_function,cellular_component,response to abiotic stimulus,response to stress	NA	25	1155	101	TATAAATGGCGGCCACCACCT	M|:|:x|:x:x:x:xx|||||	-17.5922	1.24226008928898e-06	101	MAFF311018	-155	NI-N*-NI-NS-NN-NG-NN-NS-N*-NS-NN-NS-N*-HD-HG-HD-NI-HD-HD-NG
Os09g29210.1; Os09g29210.2	Tal6a	5.56478; 4.74861666666667	purine permease, putative, expressed	membrane,transport,cellular process,transporter activity; transport,cellular process,transporter activity,plasma membrane	NA	49; 50	968	93	TATAAATGAGGGATATCCCCA	M|:|:x|::xx:::|||x||x	-18.182	1.80804191213347e-06	147	PXO99	32	NI-N*-NI-NS-NN-NG-NN-NS-N*-NS-NN-NS-N*-NI-HG-HD-NI-HD-HD-NG
Os11g26790.1	Tal6a	4.32173333333333; 3.91713666666667	dehydrin, putative, expressed	molecular_function,cellular_component,response to abiotic stimulus,response to stress	NA	2	1155	101	TATAAATGGCGGCCACCACCT	M|:|:x|:x:x:x:|x|||||	-15.3785	3.68988145333361e-08	3	PXO99	-155	NI-N*-NI-NS-NN-NG-NN-NS-N*-NS-NN-NS-N*-NI-HG-HD-NI-HD-HD-NG
Os11g37960.1	Tal6a	2.59222666666667	WIP4 - Wound-induced protein precursor, expressed	response to stress,response to biotic stimulus,response to endogenous stimulus,cell,carbohydrate binding,protein binding,response to abiotic stimulus	Wound-induced protein precursor(Cysteine Rich Peptides)	72	1034	8	TATAAATCGTAGTAACCACCT	M|:|:x|xx:::xx|x|||||	-18.732	3.45618896128915e-06	281	PXO99	-34	NI-N*-NI-NS-NN-NG-NN-NS-N*-NS-NN-NS-N*-NI-HG-HD-NI-HD-HD-NG
Os06g29790.1	Tal6a	1.99470333333333	phosphate transporter 1, putative, expressed	molecular_function,transport,response to extracellular stimulus,cell communication,response to stress,membrane	NA	1	686	332	TATAAGTGACAGCCCTCCCCT	M|:|::|:::::x:x||x|||	-13.3801	2.45992096888907e-08	2	PXO99	314	NI-N*-NI-NS-NN-NG-NN-NS-N*-NS-NN-NS-N*-NI-HG-HD-NI-HD-HD-NG
Os12g01530.1	Tal6a	1.52364	ferritin-1, chloroplast precursor, putative, expressed	cellular homeostasis,metabolic process,response to stress,biological_process,transport,plastid,mitochondrion,catalytic activity,binding,flower development,photosynthesis,multicellular organismal development	NA	14	887	385	TACAACTCATCGCAATCAACT	M|:|:x|x::x:xx||||x||	-17.2039	6.02680637377823e-07	49	PXO99	113	NI-N*-NI-NS-NN-NG-NN-NS-N*-NS-NN-NS-N*-NI-HG-HD-NI-HD-HD-NG
Os01g47840.1	Tal6a	1.44529333333333	S-locus-like receptor protein kinase, putative, expressed	metabolic process,cellular process,nucleotide binding,carbohydrate binding,kinase activity,protein modification process,protein binding,plasma membrane	Rice Kinase Interactome	64	935	44	CATAAATGGAAGCAAACACCT	m|:|:x|:xx::xx|x|||||	-18.4731	2.57061741248908e-06	209	PXO99	65	NI-N*-NI-NS-NN-NG-NN-NS-N*-NS-NN-NS-N*-NI-HG-HD-NI-HD-HD-NG
Os11g01530.1	Tal6a	1.40144666666666; 1.59828333333333	ferritin-1, chloroplast precursor, putative, expressed	cellular homeostasis,metabolic process,response to stress,biological_process,transport,plastid,mitochondrion,catalytic activity,binding,flower development,photosynthesis,multicellular organismal development	NA	40	758	500	TACAACTCATCGCCATCAGCT	M|:|:x|x::x:x:||||x||	-18.0766	1.57434942008901e-06	128	PXO99	242	NI-N*-NI-NS-NN-NG-NN-NS-N*-NS-NN-NS-N*-NI-HG-HD-NI-HD-HD-NG
Os03g40270.1	Tal6a	1.40065333333333	alpha-1,4-glucan-protein synthase, putative, expressed	membrane,nucleobase, nucleoside, nucleotide and nucleic acid metabolic process,carbohydrate metabolic process,multicellular organismal development,metabolic process,catalytic activity,cellular process,biological_process,cell wall,protein binding,Golgi apparatus,cytosol,response to stress,response to abiotic stimulus,ribosome	NA	23	1017	61	CACACCTCACCACCATCACCT	m|:|xx|x::xxx:|||||||	-17.5032	8.24073524577839e-07	67	PXO99	-17	NI-N*-NI-NS-NN-NG-NN-NS-N*-NS-NN-NS-N*-NI-HG-HD-NI-HD-HD-NG
Os03g48660.1	Tal6a	1.38942666666667; 1.50518666666667	DUF1336 domain containing protein, expressed	molecular_function,biosynthetic process,protein modification process,plasma membrane	NA	44	852	396	AACAAGTCACACACAGCACCC	m|:|::|x:::x::|x||||x	-18.1414	1.7342442830668e-06	141	PXO99	148	NI-N*-NI-NS-NN-NG-NN-NS-N*-NS-NN-NS-N*-NI-HG-HD-NI-HD-HD-NG
Os06g47200.3	Tal6a	1.21600333333333; 1.58010333333333	LTPL85 - Protease inhibitor/seed storage/LTP family protein precursor, expressed	lipid binding,transport,membrane	Protease inhibitor/Seed Storage/LTP family protein precursor(Cysteine Rich Peptides)	84	1061	40	CACAAAAAAAAGGCACCACCT	m|:|:xxx:x::x:|x|||||	-18.9119	4.20646485680031e-06	342	PXO99	-61	NI-N*-NI-NS-NN-NG-NN-NS-N*-NS-NN-NS-N*-NI-HG-HD-NI-HD-HD-NG
Os03g40610.1	Tal6a	1.06047666666667	cytochrome P450, putative, expressed	growth,molecular_function,binding,endoplasmic reticulum,flower development,anatomical structure morphogenesis,multicellular organismal development,metabolic process,oxygen binding,catalytic activity,cellular process	NA	12	842	137	TATAAATAACAGGTCTCCCCT	M|:|:x|x::::x:x||x|||	-17.1521	5.90381032533377e-07	48	PXO99	158	NI-N*-NI-NS-NN-NG-NN-NS-N*-NS-NN-NS-N*-NI-HG-HD-NI-HD-HD-NG
Os01g73890.1	PthXo7	4.57401666666667; 1.489285	transcription initiation factor IIA gamma chain, putative, expressed	nucleoplasm,nucleobase, nucleoside, nucleotide and nucleic acid metabolic process,biosynthetic process	NA	2	970	446	TATAATCCCCAAATCCCCTCCTC	M||||:x||:|||||xxxx|||:	-15.9331	2.46394220774273e-08	2	PXO99; XOO24h	30	NI-NG-NI-NI-N*-NN-HD-HD-N*-NI-NI-NI-NG-HD-HG-NN-NS-NN-HD-HD-NG-N*
Os06g09350.1	PthXo7	4.18875333333333	expressed protein	molecular_function,biological_process	NA	51	939	61	TATAACACCCTACCCTACTCCTT	M||||:x||:x|xx||xxx|||:	-21.0763	2.63641816228472e-06	214	PXO99	61	NI-NG-NI-NI-N*-NN-HD-HD-N*-NI-NI-NI-NG-HD-HG-NN-NS-NN-HD-HD-NG-N*
Os05g31620.1	PthXo7	2.68948	OsCML15 - Calmodulin-related calcium sensor protein, expressed	nucleus,response to stress,response to abiotic stimulus,binding,anatomical structure morphogenesis,cell differentiation,multicellular organismal development,cell growth,cytoplasm	Rice calmodulin-related calcium sensor proteins	4	970	108	TATAATCCCCCACCCCGCGCCTC	M||||:x||:x|xx|x:x:|||:	-18.0195	2.34074509735559e-07	19	PXO99	30	NI-NG-NI-NI-N*-NN-HD-HD-N*-NI-NI-NI-NG-HD-HG-NN-NS-NN-HD-HD-NG-N*
Os01g55580.1	PthXo7	1.95120666666667; 1.97425333333333	tesmin/TSO1-like CXC domain containing protein, expressed	biosynthetic process,nucleobase, nucleoside, nucleotide and nucleic acid metabolic process,sequence-specific DNA binding transcription factor activity	NA	39	1033	281	ACTAATCCCCAACTCGGAGACTC	mx|||:x||:||x||x:::x||:	-20.7262	1.82331723372962e-06	148	PXO99	-33	NI-NG-NI-NI-N*-NN-HD-HD-N*-NI-NI-NI-NG-HD-HG-NN-NS-NN-HD-HD-NG-N*
Os02g12610.1	PthXo7	1.92102; 1.38486	hsp20/alpha crystallin family protein, putative, expressed	response to stress,response to abiotic stimulus	NA	98	935	222	TGTAATCCCCAGCTCTGAGCCAG	Mx|||:x||:|xx|||:::||xx	-22.1209	6.19681465247296e-06	503	PXO99	65	NI-NG-NI-NI-N*-NN-HD-HD-N*-NI-NI-NI-NG-HD-HG-NN-NS-NN-HD-HD-NG-N*
Os03g20500.1	PthXo7	1.71244666666667	OsFBX82 - F-box domain containing protein, expressed	molecular_function,cellular_component,response to stress,response to abiotic stimulus	F-Box Domain Containing Proteins(F-box proteins)	38	970	92	TATAAACCCACCACCTCCGCCTT	M||||xx||xxx|x||xx:|||:	-20.7139	1.79867781165219e-06	146	PXO99	30	NI-NG-NI-NI-N*-NN-HD-HD-N*-NI-NI-NI-NG-HD-HG-NN-NS-NN-HD-HD-NG-N*
Os06g13850.1	PthXo7	1.70557333333333	OsFBX193 - F-box domain containing protein, expressed	NA	F-Box Domain Containing Proteins(F-box proteins)	83	968	99	TATAAAGTTCAAGTATCAGCCTC	M||||x:xx:||x|x|x::|||:	-21.936	5.22355748041458e-06	424	PXO99	32	NI-NG-NI-NI-N*-NN-HD-HD-N*-NI-NI-NI-NG-HD-HG-NN-NS-NN-HD-HD-NG-N*
Os10g39270.1	PthXo7	1.14004	nucleoid DNA-binding, putative	cell,protein metabolic process,hydrolase activity	NA	55	937	40	TATAAACCCTACCTCTGGACTTT	M||||xx||:|xx|||:xx|x|:	-21.283	3.14152631487198e-06	255	PXO99	63	NI-NG-NI-NI-N*-NN-HD-HD-N*-NI-NI-NI-NG-HD-HG-NN-NS-NN-HD-HD-NG-N*
Os11g06130.1	PthXo7	1.06119666666667	PHD-finger family protein, expressed	cellular_component,DNA binding,biosynthetic process,nucleobase, nucleoside, nucleotide and nucleic acid metabolic process,binding	NA	14	802	480	AATAACACACAAATCTACGCATA	m||||:x|x:||||||xx:|x|x	-19.5636	6.89903818167964e-07	56	PXO99	198	NI-NG-NI-NI-N*-NN-HD-HD-N*-NI-NI-NI-NG-HD-HG-NN-NS-NN-HD-HD-NG-N*
Os12g24490.1	Tal2a	3.98924333333333	zinc finger, C3HC4 type domain containing protein, expressed	response to stress,response to biotic stimulus,cell,biological_process,protein modification process,binding,catalytic activity	NA	28	1056	82	TATGTGTACAAACATT	M||:|:||x|x||xx|	-11.3799	2.98890857675891e-06	244	PXO99	-56	NI-NG-NN-NG-NK-NG-NI-NN-NI-NN-NI-HD-N*-NS-NG
Os07g11510.1	Tal2a	3.66205333333333	RAL6 - Seed allergenic protein RA5/RA14/RA17 precursor, expressed	NA	Seed allergenic protein RA5/RA14/RA17(Cysteine Rich Peptides)	23	1045	60	TATATATAGAAACCAC	M||x|x||:|x||::x	-11.3227	2.79291457172554e-06	228	PXO99	-45	NI-NG-NN-NG-NK-NG-NI-NN-NI-NN-NI-HD-N*-NS-NG
Os01g36790.1	Tal2a	1.94397666666667	TKL_IRAK_DUF26-lf.2 - DUF26 kinases have homology to DUF26 containing loci, expressed	cell,metabolic process,cellular process,kinase activity,protein modification process	NA	100	752	232	TATATATAGCCACCCT	M||x|x||:xx||:x|	-12.4995	1.04121815173978e-05	850	PXO99	248	NI-NG-NN-NG-NK-NG-NI-NN-NI-NN-NI-HD-N*-NS-NG
Os01g02950.1	XOO2865_MAFF	4.08657333333333	hypothetical protein	NA	NA	70	765	214	TATATATAGAGAGAGAGAGAG	M||x|x||:|:|::x::|x:x	-18.1708	3.92357394537807e-06	319	MAFF311018	235	NI-NG-NN-NG-NK-NG-NI-NN-NI-NN-NI-NN-NS-NG-NS-NN-NI-N*-NS-NG
Os07g48450.1	XOO2865_MAFF	3.03701333333333	no apical meristem protein, putative, expressed	cellular_component,biosynthetic process,nucleobase, nucleoside, nucleotide and nucleic acid metabolic process,multicellular organismal development,sequence-specific DNA binding transcription factor activity	NA	11	733	355	TAGATATAGATAGATAGATAT	M|xx|x||:|x|::|::|::|	-16.4502	7.99474314888949e-07	65	MAFF311018	267	NI-NG-NN-NG-NK-NG-NI-NN-NI-NN-NI-NN-NS-NG-NS-NN-NI-N*-NS-NG
Os04g08280.1	XOO2865_MAFF	2.47273333333333; 2.60274	retrotransposon protein, putative, Ty3-gypsy subclass, expressed	NA	NA	5	967	126	TATATATAGAGAGAGGGACCT	M||x|x||:|:|::xx:|:x|	-15.8483	4.79684588933369e-07	39	MAFF311018	33	NI-NG-NN-NG-NK-NG-NI-NN-NI-NN-NI-NN-NS-NG-NS-NN-NI-N*-NS-NG
Os05g25920.1	XOO2865_MAFF	2.44491	expressed protein	NA	NA	33	816	275	TAAGTCCACAGAGATAGCCAT	M|x:|xx|x|:|::|::x::|	-17.193	1.57434942008901e-06	128	MAFF311018	184	NI-NG-NN-NG-NK-NG-NI-NN-NI-NN-NI-NN-NS-NG-NS-NN-NI-N*-NS-NG
Os12g25130.1	XOO2865_MAFF	2.30982666666667	CRP8 - Cysteine-rich family protein precursor, expressed	NA	Cysteine-rich family protein precursor(Cysteine Rich Peptides)	25	803	257	TATATATAGAGAGAGAGGTAT	M||x|x||:|:|::x::x::|	-16.9509	1.20536127475565e-06	98	MAFF311018	197	NI-NG-NN-NG-NK-NG-NI-NN-NI-NN-NI-NN-NS-NG-NS-NN-NI-N*-NS-NG
Os03g64310.1	XOO2865_MAFF	2.20907666666667	expressed protein	NA	NA	71	1044	30	TATATATAGAGAGAGAGAGAG	M||x|x||:|:|::x::|x:x	-18.1708	3.92357394537807e-06	319	MAFF311018	-44	NI-NG-NN-NG-NK-NG-NI-NN-NI-NN-NI-NN-NS-NG-NS-NN-NI-N*-NS-NG
Os06g43550.1	XOO2865_MAFF	2.20830666666667	expressed protein	NA	NA	61	963	309	TATCAGTAGAGAGAAAGAAAG	M||xx:||:|:|::x::|x:x	-17.9653	3.16099844502246e-06	257	MAFF311018	37	NI-NG-NN-NG-NK-NG-NI-NN-NI-NN-NI-NN-NS-NG-NS-NN-NI-N*-NS-NG
Os01g67420.1	XOO2865_MAFF	1.15714	lipase, putative, expressed	hydrolase activity,lipid metabolic process	NA	56	862	117	TTTACGTAGAGAGAGAGAAAT	Mx|xx:||:|:|::x::|x:|	-17.8384	2.80430990453354e-06	228	MAFF311018	138	NI-NG-NN-NG-NK-NG-NI-NN-NI-NN-NI-NN-NS-NG-NS-NN-NI-N*-NS-NG
Os07g29780.1	XOO2865_MAFF	1.12377666666667	ATROPGEF7/ROPGEF7, putative, expressed	cellular_component,metabolic process,biological_process,enzyme regulator activity	NA	43	857	710	TATGTGTAGCGTGGTTCACAT	M||:|:||:x:x:x|xx|::|	-17.5552	2.14013124293349e-06	174	MAFF311018	143	NI-NG-NN-NG-NK-NG-NI-NN-NI-NN-NI-NN-NS-NG-NS-NN-NI-N*-NS-NG
Os11g48040.1	XOO2865_MAFF	1.07706666666667	mitochondrial carrier protein, putative, expressed	transport,cellular process,cellular_component,binding,membrane,vacuole,transporter activity,mitochondrion,biosynthetic process,plastid,photosynthesis	NA	38	1114	122	TATGTGCAGAAAAATCAAAAC	M||:|:x|:|x|x:|xx|x:x	-17.4845	2.02943479933348e-06	165	MAFF311018	-114	NI-NG-NN-NG-NK-NG-NI-NN-NI-NN-NI-NN-NS-NG-NS-NN-NI-N*-NS-NG
Os11g35320.1	XOO2865_MAFF	1.07147333333333	BSD domain-containing protein, putative, expressed	molecular_function,cellular_component,biological_process	NA	20	694	382	TATATATATAGAAATAAATCT	M||x|x||x|:|x:|:x|:x|	-16.8127	1.13156364568897e-06	92	MAFF311018	306	NI-NG-NN-NG-NK-NG-NI-NN-NI-NN-NI-NN-NS-NG-NS-NN-NI-N*-NS-NG
Os01g51040.1	XOCORF_4248	1.1030525	transmembrane protein 16K, putative, expressed	molecular_function,biological_process	NA	26	962	162	TAGAAACTGCTCTTCCT	M|:xx|xx:||||||||	-12.5341	1.76538077271084e-06	144	XOC24h	38	NI-NN-HN-NN-NI-NG-HD-NN-HD-HG-HD-HG-HG-HD-HD-NG
Os07g34260.1	XOO1134_MAFF; AvrXa27; AvrXa27	4.98959333333333; 3.20643666666667; 3.28783666666667	chalcone and stilbene synthases, putative, expressed	response to stress,response to endogenous stimulus,nucleus,endoplasmic reticulum,biosynthetic process,cellular process,secondary metabolic process,response to abiotic stimulus,membrane,vacuole,transport,transferase activity	NA	8	966	110	TATATAACGAGACCCATT	M|xx|:xx:|:|:|||||	-13.0057	5.76669710337578e-07; 7.72982803218455e-07; 7.72982803218455e-07	47; 63; 63	MAFF311018; PXO99; PXO99AME1	34	NI-NN-N*-NG-NS-NN-NN-NN-NI-NN-NI-N*-HD-HD-NI-NG-NG
Os02g40410.1	XOO1134_MAFF; AvrXa27; AvrXa27	4.85338; 4.75544666666667; 4.99362666666667; 5.28388; 5.12608333333333; 4.90074	expressed protein	molecular_function,cellular_component,protein binding,biological_process	NA	12	817	2031	TAGTTAAGGCGATCCATG	M|::|:x::x:|:||||x	-13.6274	1.3864612184712e-06; 1.57050474304702e-06; 1.57050474304702e-06	113; 128; 128	MAFF311018; PXO99; PXO99AME1	183	NI-NN-N*-NG-NS-NN-NN-NN-NI-NN-NI-N*-HD-HD-NI-NG-NG
Os04g56030.1	XOO1134_MAFF; AvrXa27; AvrXa27	4.54175666666667; 3.49248; 2.54532666666667	glycine-rich cell wall structural protein precursor, putative, expressed	NA	NA	38	917	179	AAGTTTGGAAAATCCATT	m|::|x::x|x|:|||||	-14.645	4.06122710897315e-06; 4.02441840405799e-06; 4.02441840405799e-06	331; 328; 328	MAFF311018; PXO99; PXO99AME1	83	NI-NN-N*-NG-NS-NN-NN-NN-NI-NN-NI-N*-HD-HD-NI-NG-NG
Os06g04830.1	XOO1134_MAFF; AvrXa27; AvrXa27	3.44321666666667; 1.71843333333333; 2.12948333333333	leucine rich repeat protein, putative, expressed	response to stress,response to biotic stimulus,signal transduction,cell wall	NA	2	942	1697	TAGCTAGCGAGCCCCCTT	M|::|::x:|:x:||x||	-11.6401	9.81565464404387e-08; 1.84043524575823e-07; 1.84043524575823e-07	8; 15; 15	MAFF311018; PXO99; PXO99AME1	58	NI-NN-N*-NG-NS-NN-NN-NN-NI-NN-NI-N*-HD-HD-NI-NG-NG
Os04g52180.3	XOO1134_MAFF	2.26375333333333	expressed protein	NA	NA	56	1033	36	TAGCTCGAGCGCTCCCTT	M|::|x:x:x:x:||x||	-15.0389	5.90166235473138e-06	481	MAFF311018	-33	NI-NN-N*-NG-NS-NN-NN-NN-NI-NN-NI-N*-HD-HD-NI-NG-NG
Os06g29790.1	XOO1134_MAFF; AvrXa27; AvrXa27	2.03809666666667; 1.99470333333333; 1.80221333333333	phosphate transporter 1, putative, expressed	molecular_function,transport,response to extracellular stimulus,cell communication,response to stress,membrane	NA	21	731	290	TAGCTAGGGGAATCCATG	M|::|::::xx|:||||x	-14.0715	2.36802668287558e-06; 2.39256581948569e-06; 2.39256581948569e-06	193; 195; 195	MAFF311018; PXO99; PXO99AME1	269	NI-NN-N*-NG-NS-NN-NN-NN-NI-NN-NI-N*-HD-HD-NI-NG-NG
Os10g36100.1	XOO1134_MAFF; AvrXa27; AvrXa27	1.62564; 1.19750333333333; 1.01775666666667	LTPL157 - Protease inhibitor/seed storage/LTP family protein precursor, expressed	cell,lipid binding,transport	Protease inhibitor/Seed Storage/LTP family protein precursor(Cysteine Rich Peptides)	19	744	312	TAGTCAAAGAGACCCATA	M|::x:xx:|:|:||||x	-14.0684	2.34348754626547e-06; 2.39256581948569e-06; 2.39256581948569e-06	191; 195; 195	MAFF311018; PXO99; PXO99AME1	256	NI-NN-N*-NG-NS-NN-NN-NN-NI-NN-NI-N*-HD-HD-NI-NG-NG
Os03g25060.1	AvrXa27	1.3375; 1.52566333333333	expressed protein	NA	NA	46	992	21	TAGCTAAAGAGATCCAGA	M|::|:xx:|:|:|||xx	-14.8264	4.79740120727644e-06	391	PXO99; PXO99AME1	8	NI-NN-N*-NG-NS-NN-NN-NN-NI-NN-NI-N*-HD-HD-NI-NG-NG
Os03g07170.1	XOO1134_MAFF	1.14227333333333	lactose permease-related, putative, expressed	molecular_function,membrane,transport,cellular process	NA	96	683	993	TAGCTACAACGATCCATA	M|::|:xxxx:|:||||x	-15.5796	9.68068939268827e-06	789	MAFF311018	317	NI-NN-N*-NG-NS-NN-NN-NN-NI-NN-NI-N*-HD-HD-NI-NG-NG
Os11g48040.1	XOO1134_MAFF	1.07706666666667	mitochondrial carrier protein, putative, expressed	transport,cellular process,cellular_component,binding,membrane,vacuole,transporter activity,mitochondrion,biosynthetic process,plastid,photosynthesis	NA	1	806	433	TAGTTAGGCATACCCATT	M|::|:::x|x|:|||||	-10.9191	4.90782732202194e-08	4	MAFF311018	194	NI-NN-N*-NG-NS-NN-NN-NN-NI-NN-NI-N*-HD-HD-NI-NG-NG
Os08g31460.1	AvrXa27	1.04967666666667; 1.04034666666667	GTPase of unknown function domain containing protein, putative, expressed	signal transduction,catabolic process,nucleobase, nucleoside, nucleotide and nucleic acid metabolic process,intracellular,nucleotide binding,hydrolase activity	NA	54	895	87	TAGAAAGTGAGCTCCATT	M|:xx::x:|:x:|||||	-14.9853	5.74215796676567e-06	468	PXO99AME1	105	NI-NN-N*-NG-NS-NN-NN-NN-NI-NN-NI-N*-HD-HD-NI-NG-NG
Os01g56380.1	XOO1134_MAFF	1.02484333333333	decarboxylase, putative, expressed	response to stress,catalytic activity,cellular_component,metabolic process,cellular process,binding	NA	36	1051	54	TAGCTAGCGAGCCCAATA	M|::|::x:|:x:|x||x	-14.6004	3.90172272100744e-06	318	MAFF311018	-51	NI-NN-N*-NG-NS-NN-NN-NN-NI-NN-NI-N*-HD-HD-NI-NG-NG
Os01g56380.1	XOO1134_MAFF	1.02484333333333	decarboxylase, putative, expressed	response to stress,catalytic activity,cellular_component,metabolic process,cellular process,binding	NA	39	978	127	TAGATAGAGAGATACAGT	M|:x|::x:|:|:x||x|	-14.6736	4.12257495049843e-06	336	MAFF311018	22	NI-NN-N*-NG-NS-NN-NN-NN-NI-NN-NI-N*-HD-HD-NI-NG-NG
Os10g25310.1	Tal9d	2.96523	SPX domain containing protein, putative, expressed	molecular_function,cellular_component,response to extracellular stimulus,cell communication,response to stress	NA	50	882	241	TAAATTCTCTCCAT	M|x|||x|||||x|	-9.03466	4.15811399689658e-06	340	PXO99	118	NI-NN-NI-HG-HG-NN-HG-HD-HG-HD-HD-HD-NG
Os08g05910.1	Tal9d	2.28179666666667	peptide transporter PTR2, putative, expressed	transport,transporter activity,response to stress,response to abiotic stimulus,protein binding,cellular process,biological_process,plasma membrane	NA	1	944	142	TAGATTCTCTCCCT	M|:|||x|||||||	-5.53045	1.22297470496958e-08	1	PXO99	56	NI-NN-NI-HG-HG-NN-HG-HD-HG-HD-HD-HD-NG
Os05g34830.1	Tal9d	1.94326666666667	No apical meristem protein, putative, expressed	response to stress,biosynthetic process,nucleobase, nucleoside, nucleotide and nucleic acid metabolic process,multicellular organismal development,response to endogenous stimulus,signal transduction,sequence-specific DNA binding transcription factor activity	NA	71	1027	50	TAGCTTGTCTCTCT	M|:x||:||||x||	-9.27671	5.41777794301525e-06	443	PXO99	-27	NI-NN-NI-HG-HG-NN-HG-HD-HG-HD-HD-HD-NG
Os01g49320.1	Tal9d	1.85988	glycosyl hydrolase, putative, expressed	response to stress,metabolic process,response to abiotic stimulus,catalytic activity,cell,binding,hydrolase activity,response to extracellular stimulus,cell communication	NA	51	863	184	TAGACTATCTCCAT	M|:|x|x|||||x|	-9.05953	4.20703298509536e-06	344	PXO99	137	NI-NN-NI-HG-HG-NN-HG-HD-HG-HD-HD-HD-NG
Os03g25060.1	Tal9d	1.3375	expressed protein	NA	NA	65	879	138	CACACTGTCTCCCT	m|x|x|:|||||||	-9.24605	5.17318300202133e-06	423	PXO99	121	NI-NN-NI-HG-HG-NN-HG-HD-HG-HD-HD-HD-NG
Os03g24184.1	Tal9d	1.17692333333333	TRAF-type zinc finger domain-containing protein 1, putative, expressed	biological_process	NA	41	984	217	TAAATTCTCTCCCC	M|x|||x||||||x	-8.90371	3.70561335605783e-06	303	PXO99	16	NI-NN-NI-HG-HG-NN-HG-HD-HG-HD-HD-HD-NG
Os09g30490.1	Tal9d	1.15584666666667	EF hand family protein, expressed	binding,cytosol,biological_process	NA	95	801	244	TAGCGTATCTCCCT	M|:xx|x|||||||	-9.52121	7.20332101227084e-06	589	PXO99	199	NI-NN-NI-HG-HG-NN-HG-HD-HG-HD-HD-HD-NG
Os11g47870.1	Tal9d	1.14311333333333	GRAS family transcription factor domain containing protein, expressed	cellular_component,biosynthetic process,nucleobase, nucleoside, nucleotide and nucleic acid metabolic process,sequence-specific DNA binding transcription factor activity	NA	6	1005	49	TCCATTGTCTCCCT	Mxx|||:|||||||	-7.56082	6.84865834782966e-07	56	PXO99	-5	NI-NN-NI-HG-HG-NN-HG-HD-HG-HD-HD-HD-NG
Os10g25310.1	XOO1132_MAFF	4.99853333333333	SPX domain containing protein, putative, expressed	molecular_function,cellular_component,response to extracellular stimulus,cell communication,response to stress	NA	48	882	241	TAAATTCTCTCCAT	M|x|||x|||||x|	-8.47798	2.88622030372821e-06	236	MAFF311018	118	NI-NN-NI-HG-HG-NV-HG-HD-HG-HD-HD-HD-NG
Os01g49320.1	XOO1132_MAFF	2.55263	glycosyl hydrolase, putative, expressed	response to stress,metabolic process,response to abiotic stimulus,catalytic activity,cell,binding,hydrolase activity,response to extracellular stimulus,cell communication	NA	56	863	184	TAGACTATCTCCAT	M|:|x|:|||||x|	-8.66559	3.60777537966027e-06	295	MAFF311018	137	NI-NN-NI-HG-HG-NV-HG-HD-HG-HD-HD-HD-NG
Os08g05910.1	XOO1132_MAFF	1.95708	peptide transporter PTR2, putative, expressed	transport,transporter activity,response to stress,response to abiotic stimulus,protein binding,cellular process,biological_process,plasma membrane	NA	1	944	142	TAGATTCTCTCCCT	M|:|||x|||||||	-4.97377	1.22297470496958e-08	1	MAFF311018	56	NI-NN-NI-HG-HG-NV-HG-HD-HG-HD-HD-HD-NG
Os09g30490.1	XOO1132_MAFF	1.73020666666667	EF hand family protein, expressed	binding,cytosol,biological_process	NA	93	801	244	TAGCGTATCTCCCT	M|:xx|:|||||||	-9.12727	5.72352161925765e-06	468	MAFF311018	199	NI-NN-NI-HG-HG-NV-HG-HD-HG-HD-HD-HD-NG
Os08g43300.1	XOO1132_MAFF	1.54556333333333	UBX domain-containing protein, putative, expressed	nucleus,cytosol,transport,cellular process	NA	85	726	393	TCGCTTCTCTCCCT	Mx:x||x|||||||	-9.04968	5.39331844891586e-06	441	MAFF311018	274	NI-NN-NI-HG-HG-NV-HG-HD-HG-HD-HD-HD-NG
Os03g06200.1	XOO1132_MAFF	1.44041333333333	aminotransferase, putative, expressed	metabolic process,transferase activity,biosynthetic process,cellular process,plastid	NA	83	982	70	TAAATCTCCTCCCT	M|x||xxx||||||	-9.04347	5.35662920776677e-06	438	MAFF311018	18	NI-NN-NI-HG-HG-NV-HG-HD-HG-HD-HD-HD-NG
Os01g63580.1	XOO1132_MAFF	1.36404	glycerol-3-phosphate acyltransferase, putative, expressed	flower development,biosynthetic process,cellular process,lipid metabolic process,metabolic process,transferase activity	NA	82	968	106	TATATTAACTCCCT	M|x|||:x||||||	-9.04056	5.35662920776677e-06	438	MAFF311018	32	NI-NN-NI-HG-HG-NV-HG-HD-HG-HD-HD-HD-NG
Os07g06600.1	XOO1132_MAFF	1.14066333333333	glutaredoxin, putative, expressed	catalytic activity,molecular_function,metabolic process,cellular homeostasis	NA	80	746	361	TAAAAAATCTCCCT	M|x|xx:|||||||	-9.02245	5.2587912313692e-06	430	MAFF311018	254	NI-NN-NI-HG-HG-NV-HG-HD-HG-HD-HD-HD-NG
Os06g09980.1	XOO1132_MAFF	1.079	expressed protein	NA	NA	72	1014	161	TATATTATCCCCCT	M|x|||:||x||||	-8.89214	4.73291210823228e-06	387	MAFF311018	-14	NI-NN-NI-HG-HG-NV-HG-HD-HG-HD-HD-HD-NG
Os03g24184.1	XOO1132_MAFF	1.07746	TRAF-type zinc finger domain-containing protein 1, putative, expressed	biological_process	NA	38	984	217	TAAATTCTCTCCCC	M|x|||x||||||x	-8.34704	2.44594940993916e-06	200	MAFF311018	16	NI-NN-NI-HG-HG-NV-HG-HD-HG-HD-HD-HD-NG
Os12g24320.1	Tal4	2.69056; 2.14335666666667	ATPase 3, putative, expressed	reproduction,nucleotide binding,catabolic process,nucleobase, nucleoside, nucleotide and nucleic acid metabolic process,mitochondrion,post-embryonic development,hydrolase activity	NA	23	843	192	TAGGAAAAATGGTACTC	M|::|||x:|::x|x||	-12.2367	1.81441912750837e-06	148	PXO99	157	NI-NN-NN-NI-NI-NI-HD-NS-HG-NN-NN-NN-NI-NI-HG-HD
Os02g15594.1	Tal4	1.28760666666667	protein phosphatase 2C, putative, expressed	cell,protein modification process,metabolic process,cellular process,catalytic activity,hydrolase activity	NA	45	916	196	TACGCCACAGGGGAATC	M|x:xx||:x:::||||	-13.1326	4.48700946397339e-06	366	PXO99	84	NI-NN-NN-NI-NI-NI-HD-NS-HG-NN-NN-NN-NI-NI-HG-HD
Os05g51670.1	Tal4	1.27723333333333	NAD dependent epimerase/dehydratase family protein, putative, expressed	metabolic process,cytosol,cellular process,catalytic activity,protein binding	NA	53	797	305	TAGGAAAAAGGGAAATA	M|::|||x:x::x|||x	-13.2036	4.83027794755605e-06	394	PXO99	203	NI-NN-NN-NI-NI-NI-HD-NS-HG-NN-NN-NN-NI-NI-HG-HD
Os07g10580.1	Tal4	1.22965	PROLM26 - Prolamin precursor, expressed	NA	Prolamin precursor(Cysteine Rich Peptides)	88	715	326	TACAAAACATAACAAAC	M|xx||||:|xxx||x|	-13.8087	8.82690386355421e-06	720	PXO99	285	NI-NN-NN-NI-NI-NI-HD-NS-HG-NN-NN-NN-NI-NI-HG-HD
Os08g08840.1	Tal4	1.21356666666667	phosphate/phosphate translocator, putative, expressed	transport,cellular process,transporter activity,biological_process,response to biotic stimulus,response to abiotic stimulus,membrane,vacuole,photosynthesis	NA	71	720	1327	TAGACAACAGGGAAACC	M|:xx|||:x::x||x|	-13.6121	7.18411897783718e-06	586	PXO99	280	NI-NN-NN-NI-NI-NI-HD-NS-HG-NN-NN-NN-NI-NI-HG-HD
Os11g10420.1	Tal4	1.02519666666667	phosphatidylinositol kinase, putative, expressed	membrane,nucleus,biosynthetic process,cellular process,lipid metabolic process,metabolic process,pollination,cellular component organization,anatomical structure morphogenesis,cell differentiation,cell growth,multicellular organismal development,kinase activity,protein binding,cytosol,cell,cytoplasm	NA	33	724	707	GAGGAAACATAAAAATC	m|::||||:|xxx||||	-12.5988	2.67259033646503e-06	218	PXO99	276	NI-NN-NN-NI-NI-NI-HD-NS-HG-NN-NN-NN-NI-NI-HG-HD
Os11g37300.1	Tal4	1.01575333333333	OsFBDUF53 - F-box and DUF domain containing protein, expressed	molecular_function,cellular_component,biological_process	F-Box and Domain of Unknown Function Containing Proteins(F-box proteins)	35	967	495	TAGAAAACCTGAGAAAA	M|:x||||x|:x:||xx	-12.6021	2.68484992516441e-06	219	PXO99	33	NI-NN-NN-NI-NI-NI-HD-NS-HG-NN-NN-NN-NI-NI-HG-HD
Os12g24320.1	XOO2129_MAFF	2.84109333333333; 3.28267	ATPase 3, putative, expressed	reproduction,nucleotide binding,catabolic process,nucleobase, nucleoside, nucleotide and nucleic acid metabolic process,mitochondrion,post-embryonic development,hydrolase activity	NA	16	843	192	TAGGAAAAATGGTACTC	M|::|||x:|::x|x||	-12.0276	1.32403557953313e-06	108	MAFF311018	157	NI-NN-NN-NI-NI-NI-HD-NS-HG-NN-NN-NN-NI-NI-NG-HD
Os02g51810.1	XOO2129_MAFF	2.62951666666667	expressed protein	transport,cellular component organization,cellular process,metabolic process,protein binding,catalytic activity,mitochondrion,binding,hydrolase activity	NA	20	961	155	TAGGAAACAAAAGAAGC	M|::||||:xxx:||x|	-12.2166	1.65504447441641e-06	135	MAFF311018	39	NI-NN-NN-NI-NI-NI-HD-NS-HG-NN-NN-NN-NI-NI-NG-HD
Os08g01830.1	XOO2129_MAFF	2.27905	TKL_IRAK_CR4L.6 - The CR4L subfamily has homology with Crinkly4, expressed	cell,metabolic process,cellular process,kinase activity,protein modification process,protein binding	NA	90	716	409	AAAAAAACATGAGAATA	m|xx||||:|:x:|||x	-13.8462	8.54493332346845e-06	697	MAFF311018	284	NI-NN-NN-NI-NI-NI-HD-NS-HG-NN-NN-NN-NI-NI-NG-HD
Os05g51670.1	XOO2129_MAFF	1.37962666666667	NAD dependent epimerase/dehydratase family protein, putative, expressed	metabolic process,cytosol,cellular process,catalytic activity,protein binding	NA	40	797	305	TAGGAAAAAGGGAAATA	M|::|||x:x::x|||x	-12.9931	3.75143414201054e-06	306	MAFF311018	203	NI-NN-NN-NI-NI-NI-HD-NS-HG-NN-NN-NN-NI-NI-NG-HD
Os09g25200.1	XOO2129_MAFF	1.22458333333333	protein binding protein, putative	NA	NA	1	778	205	TAGCAAACATGCGAATC	M|:x||||:|:x:||||	-8.2019	0	0	MAFF311018	222	NI-NN-NN-NI-NI-NI-HD-NS-HG-NN-NN-NN-NI-NI-NG-HD
Os09g10720.1	XOO2129_MAFF	1.14224	AP2-associated protein kinase 1, putative, expressed	cellular_component,kinase activity,nucleotide binding,protein modification process	NA	44	978	623	AAACAAACATGGGAAAC	m|xx||||:|:::||x|	-13.0616	3.98436632729878e-06	325	MAFF311018	22	NI-NN-NN-NI-NI-NI-HD-NS-HG-NN-NN-NN-NI-NI-NG-HD
Os11g39990.1	XOO2129_MAFF	1.09104	patatin, putative, expressed	hydrolase activity,cellular_component,molecular_function,metabolic process,response to endogenous stimulus	NA	66	779	397	TATGAAACATGAGACAC	M|x:||||:|:x:|xx|	-13.5738	6.62017789766566e-06	540	MAFF311018	221	NI-NN-NN-NI-NI-NI-HD-NS-HG-NN-NN-NN-NI-NI-NG-HD
Os06g10100.1	XOO2129_MAFF	1.05926	expressed protein	NA	NA	45	715	369	AAGGAAACTCGCGAATC	m|::||||xx:x:||||	-13.1209	4.2908560447833e-06	350	MAFF311018	285	NI-NN-NN-NI-NI-NI-HD-NS-HG-NN-NN-NN-NI-NI-NG-HD
Os02g15594.1	XOO2129_MAFF	1.02840666666667	protein phosphatase 2C, putative, expressed	cell,protein modification process,metabolic process,cellular process,catalytic activity,hydrolase activity	NA	37	916	196	TACGCCACAGGGGAATC	M|x:xx||:x:::||||	-12.9221	3.43268483582664e-06	280	MAFF311018	84	NI-NN-NN-NI-NI-NI-HD-NS-HG-NN-NN-NN-NI-NI-NG-HD
Os03g18890.1	Tal5a	3.31408	glycosyl transferase 8 domain containing protein, putative, expressed	transferase activity,biosynthetic process,carbohydrate metabolic process,Golgi apparatus	NA	34	989	600	TAGCCCGCTTGGCTTCT	M|x|xx:|:|::|x|||	-12.5113	1.92475542580279e-06	157	PXO99	11	NI-NS-HD-HG-NS-NN-HD-H*-NG-NN-NN-HD-HD-NG-HD-NG
Os09g07460.1	Tal5a	3.16549	kelch repeat protein, putative, expressed	molecular_function,nucleus,cytosol,biological_process,cytoplasm	NA	21	1011	63	TATATCACTTGGCCTCT	M|xx|xx|:|::|||||	-11.941	1.00528627334923e-06	82	PXO99	-11	NI-NS-HD-HG-NS-NN-HD-H*-NG-NN-NN-HD-HD-NG-HD-NG
Os11g42950.1	Tal5a	2.68373333333333	expressed protein	NA	NA	42	961	78	TAGCTAGCTCAGCCTCA	M|x||::|:xx:||||x	-12.7929	2.45191773987617e-06	200	PXO99	39	NI-NS-HD-HG-NS-NN-HD-H*-NG-NN-NN-HD-HD-NG-HD-NG
Os07g09020.1	Tal5a	2.17632333333333	argonaute, putative, expressed	response to endogenous stimulus,response to stress,response to biotic stimulus,anatomical structure morphogenesis,multicellular organismal development,cytoplasm,nuclease activity,regulation of gene expression, epigenetic,cellular process,cell differentiation,protein binding,response to abiotic stimulus,cytosol,RNA binding,nucleus,metabolic process,reproduction,post-embryonic development,embryo de…	NA	32	967	102	TAAATAGCCCCGCCTCT	M|:x|::|xxx:|||||	-12.4108	1.6673040631158e-06	136	PXO99	33	NI-NS-HD-HG-NS-NN-HD-H*-NG-NN-NN-HD-HD-NG-HD-NG
Os03g55530.1	Tal5a	1.92779333333333	HLS, putative, expressed	cellular_component,cellular component organization,anatomical structure morphogenesis,cell growth,metabolic process,response to endogenous stimulus,signal transduction,transferase activity,post-embryonic development,response to abiotic stimulus	NA	3	1012	618	TAGCTAGCTTAGCCCCT	M|x||::|:|x:||x||	-10.1957	1.71634241791332e-07	14	PXO99	-12	NI-NS-HD-HG-NS-NN-HD-H*-NG-NN-NN-HD-HD-NG-HD-NG
Os03g17700.1	Tal5a	1.79956666666667	CGMC_MAPKCGMC_2_ERK.2 - CGMC includes CDA, MAPK, GSK3, and CLKC kinases, expressed	metabolic process,cellular process,response to endogenous stimulus,signal transduction,response to stress,response to abiotic stimulus,protein modification process,multicellular organismal development,flower development,biological_process,protein binding,kinase activity,signal transducer activity,biosynthetic process,secondary metabolic process,post-embryonic development,response to biotic stimul…	Rice Kinase Interactome	15	1141	119	TAGCTGCCTTCGCCTCT	M|x||xx|:|x:|||||	-11.5917	7.72354088060993e-07	63	PXO99	-141	NI-NS-HD-HG-NS-NN-HD-H*-NG-NN-NN-HD-HD-NG-HD-NG
Os08g41470.1	Tal5a	1.71645666666667	proteophosphoglycan ppg4, putative, expressed	NA	NA	4	1059	101	TAGCTAGCTTAGCCCCT	M|x||::|:|x:||x||	-10.1957	1.71634241791332e-07	14	PXO99	-59	NI-NS-HD-HG-NS-NN-HD-H*-NG-NN-NN-HD-HD-NG-HD-NG
Os01g36930.1	Tal5a	1.37828	ubiquitin carboxyl-terminal hydrolase 6, putative, expressed	hydrolase activity,metabolic process,cellular_component,protein modification process,protein binding	NA	64	1016	96	TATTTCGCTTCGCCTCT	M|xx|x:|:|x:|||||	-13.2355	3.66561702111487e-06	299	PXO99	-16	NI-NS-HD-HG-NS-NN-HD-H*-NG-NN-NN-HD-HD-NG-HD-NG
Os04g43560.1	Tal5a	1.36895	no apical meristem protein, putative, expressed	cellular_component,biosynthetic process,nucleobase, nucleoside, nucleotide and nucleic acid metabolic process,multicellular organismal development,sequence-specific DNA binding transcription factor activity	NA	2	934	225	TAGCTCGCTTGGCCCCT	M|x||x:|:|::||x||	-9.96105	1.34855475693189e-07	11	PXO99	66	NI-NS-HD-HG-NS-NN-HD-H*-NG-NN-NN-HD-HD-NG-HD-NG
Os09g36730.1	Tal5a	1.33516	MYB family transcription factor, putative, expressed	biosynthetic process,nucleobase, nucleoside, nucleotide and nucleic acid metabolic process,biological_process,DNA binding,response to endogenous stimulus,response to abiotic stimulus,sequence-specific DNA binding transcription factor activity	NA	68	923	155	TCACCAACTCAGCCTCT	Mx:|x:x|:xx:|||||	-13.2726	3.78821290810868e-06	309	PXO99	77	NI-NS-HD-HG-NS-NN-HD-H*-NG-NN-NN-HD-HD-NG-HD-NG
Os08g38910.1	Tal5a	1.15890666666667	caffeoyl-CoA O-methyltransferase, putative, expressed	biological_process,cytosol,transferase activity,metabolic process,cellular process,biosynthetic process,secondary metabolic process	NA	85	962	117	TAACAACCTTAACCTCA	M|:|x:x|:|xx||||x	-13.4781	4.74446082666039e-06	387	PXO99	38	NI-NS-HD-HG-NS-NN-HD-H*-NG-NN-NN-HD-HD-NG-HD-NG
Os02g06670.1	Tal5a	1.13709333333333	retrotransposon protein, putative, unclassified, expressed	NA	NA	1	963	120	TACCTAGCTTGGCCTCT	M|x||::|:|::|||||	-6.19441	0	0	PXO99	37	NI-NS-HD-HG-NS-NN-HD-H*-NG-NN-NN-HD-HD-NG-HD-NG
Os02g39850.1	XOO1996_MAFF	3.22623666666667	transferase family protein, putative, expressed	transferase activity,metabolic process,biosynthetic process,cellular process,secondary metabolic process,cytosol,biological_process	NA	41	991	222	TAGCTCACCAGCTCTCCCC	M|x||xx|:x:x||||||x	-14.7361	9.33246877015192e-07	76	MAFF311018	9	NI-NS-HD-NG-NS-NN-HD-N*-NN-NN-NI-NG-HD-NG-HD-HD-HD-NG
Os04g52810.1	XOO1996_MAFF	3.02285	no apical meristem protein, putative, expressed	reproduction,anatomical structure morphogenesis,post-embryonic development,embryo development,biosynthetic process,nucleobase, nucleoside, nucleotide and nucleic acid metabolic process,multicellular organismal development,response to endogenous stimulus,signal transduction,sequence-specific DNA binding transcription factor activity	NA	6	954	898	TATCTAGCTAAATCTCCAT	M|x||::|:xx||||||x|	-12.9657	1.71913898397535e-07	14	MAFF311018	46	NI-NS-HD-NG-NS-NN-HD-N*-NN-NN-NI-NG-HD-NG-HD-HD-HD-NG
Os04g52810.1	XOO1996_MAFF	3.02285	no apical meristem protein, putative, expressed	reproduction,anatomical structure morphogenesis,post-embryonic development,embryo development,biosynthetic process,nucleobase, nucleoside, nucleotide and nucleic acid metabolic process,multicellular organismal development,response to endogenous stimulus,signal transduction,sequence-specific DNA binding transcription factor activity	NA	26	871	981	TACCTACATAGATCTCCCC	M|x||:xx:x:|||||||x	-14.3694	6.75376029418889e-07	55	MAFF311018	129	NI-NS-HD-NG-NS-NN-HD-N*-NN-NN-NI-NG-HD-NG-HD-HD-HD-NG
Os02g51110.1	XOO1996_MAFF	2.82302333333333	aquaporin protein, putative, expressed	transport,transporter activity,membrane,cellular process	NA	1	1029	150	TAGCTAGCTCGATCTCCCT	M|x||::|:x:||||||||	-9.21316	0	0	MAFF311018	-29	NI-NS-HD-NG-NS-NN-HD-N*-NN-NN-NI-NG-HD-NG-HD-HD-HD-NG
Os07g09670.1	XOO1996_MAFF	2.50211333333333	galactosyltransferase family protein, putative, expressed	biosynthetic process,protein modification process,carbohydrate metabolic process,metabolic process,carbohydrate binding,transferase activity,plastid	NA	58	1148	67	TACCACCCCGCATCTCCCC	M|x|xxx|::x|||||||x	-15.3605	1.65774116311909e-06	135	MAFF311018	-148	NI-NS-HD-NG-NS-NN-HD-N*-NN-NN-NI-NG-HD-NG-HD-HD-HD-NG
Os02g08100.1	XOO1996_MAFF	2.40586666666667	AMP-binding domain containing protein, expressed	response to stress,cellular_component,catalytic activity,response to biotic stimulus,metabolic process,response to abiotic stimulus,cellular process,secondary metabolic process	NA	72	926	149	CAACTCCCCCCAACTCCCT	m|:||xx|:xx|x||||||	-15.6074	2.16120329414044e-06	176	MAFF311018	74	NI-NS-HD-NG-NS-NN-HD-N*-NN-NN-NI-NG-HD-NG-HD-HD-HD-NG
Os02g49230.1	XOO1996_MAFF	2.23652666666667	CCT/B-box zinc finger protein, putative, expressed	biological_process,nucleus,biosynthetic process,nucleobase, nucleoside, nucleotide and nucleic acid metabolic process,binding,reproduction,response to abiotic stimulus,post-embryonic development,sequence-specific DNA binding transcription factor activity	NA	32	1083	1945	TTCCTCGCTCGCTCTCCCT	Mxx||x:|:x:x|||||||	-14.5531	7.85892106960161e-07	64	MAFF311018	-83	NI-NS-HD-NG-NS-NN-HD-N*-NN-NN-NI-NG-HD-NG-HD-HD-HD-NG
Os10g42110.1	XOO1996_MAFF	2.23638	protein kinase family protein, putative, expressed	metabolic process,cellular process,nucleotide binding,biosynthetic process,protein modification process,kinase activity,response to endogenous stimulus,signal transduction,binding,plasma membrane	NA	10	963	198	CAACCGGCCGGATCTCCCC	m|:|xx:|:::|||||||x	-13.3461	2.4559128342505e-07	20	MAFF311018	37	NI-NS-HD-NG-NS-NN-HD-N*-NN-NN-NI-NG-HD-NG-HD-HD-HD-NG
Os02g48200.1	XOO1996_MAFF	2.04356666666667	lectin-like protein kinase, putative, expressed	metabolic process,cellular process,nucleotide binding,kinase activity,protein modification process,binding,cell,carbohydrate binding	NA	31	946	63	TCACCAACTCCATCTCCCT	Mx:|x:x|:xx||||||||	-14.5485	7.85892106960161e-07	64	MAFF311018	54	NI-NS-HD-NG-NS-NN-HD-N*-NN-NN-NI-NG-HD-NG-HD-HD-HD-NG
Os08g43670.1	XOO1996_MAFF	1.71242333333333	RING-H2 finger protein ATL2B, putative, expressed	binding	NA	24	1100	86	TAGCTAGCTAGATCCTCCT	M|x||::|:x:|||xx|||	-14.3383	6.63096465247636e-07	54	MAFF311018	-100	NI-NS-HD-NG-NS-NN-HD-N*-NN-NN-NI-NG-HD-NG-HD-HD-HD-NG
Os02g56510.1	XOO1996_MAFF	1.43934	phosphate transporter 1, putative, expressed	transport,response to extracellular stimulus,cell communication,response to stress,membrane	NA	96	1072	399	AAGCTAGCTAGCTCTACCT	m|x||::|:x:x|||x|||	-16.0416	3.08217060698438e-06	251	MAFF311018	-72	NI-NS-HD-NG-NS-NN-HD-N*-NN-NN-NI-NG-HD-NG-HD-HD-HD-NG
Os02g13300.1	XOO1996_MAFF	1.38852666666667; 1.20841	mitochondrial carrier protein, putative, expressed	transport,membrane,cellular process,mitochondrion,binding,transporter activity	NA	91	879	270	CAGCTTGACAAATCTCCCT	m|x||x:x:xx||||||||	-15.9721	2.9470954011006e-06	240	MAFF311018	121	NI-NS-HD-NG-NS-NN-HD-N*-NN-NN-NI-NG-HD-NG-HD-HD-HD-NG
Os01g23990.1	XOO1996_MAFF	1.30518666666667; 1.34035	expressed protein	NA	NA	29	1002	38	CTACTAGCTAGATCTCACT	mx:||::|:x:|||||x||	-14.481	7.49053414446404e-07	61	MAFF311018	-2	NI-NS-HD-NG-NS-NN-HD-N*-NN-NN-NI-NG-HD-NG-HD-HD-HD-NG
Os10g25060.1	XOO1996_MAFF	1.20364; 1.29303666666667	expressed protein	molecular_function,response to abiotic stimulus,response to stress	NA	65	697	715	TTCCCACCCGGATCACCCT	Mxx|x:x|:::|||x||||	-15.5148	1.97700983157166e-06	161	MAFF311018	303	NI-NS-HD-NG-NS-NN-HD-N*-NN-NN-NI-NG-HD-NG-HD-HD-HD-NG
Os05g08830.1	XOO1996_MAFF	1.14068333333333	expressed protein	NA	NA	12	880	156	TAACTAGCCGCCTAACCCT	M|:||::|::xx|xx||||	-13.5726	3.31548232623818e-07	27	MAFF311018	120	NI-NS-HD-NG-NS-NN-HD-N*-NN-NN-NI-NG-HD-NG-HD-HD-HD-NG
Os01g69830.1	XOO1996_MAFF	1.02465333333333; 1.40425	OsSPL2 - SBP-box gene family member, expressed	flower development,DNA binding,nucleus,biosynthetic process,nucleobase, nucleoside, nucleotide and nucleic acid metabolic process,sequence-specific DNA binding transcription factor activity	SQUAMOSA Promoter Binding Protein (SBP)-Box Proteins	75	869	342	TAGCTAGCTGCAGCTTCCT	M|x||::|::x|x||x|||	-15.6274	2.18576242248295e-06	178	MAFF311018	131	NI-NS-HD-NG-NS-NN-HD-N*-NN-NN-NI-NG-HD-NG-HD-HD-HD-NG
Os08g42350.1	PthXo1	9.35267666666667; 9.53181; 3.33678	nodulin MtN3 family protein, putative, expressed	membrane,transport,cellular process,transporter activity,molecular_function,cell,plasma membrane,biological_process	NA	1	921	226	TGCATCTCCCCCTACTGTACACCAC	M:|||||:||xx||||:||x|x:::	-15.6417	0	0	PXO99; PXO99AME2; XOO24h	79	NN-HD-NI-HG-HD-NG-N*-HD-HD-NI-NG-NG-NI-HD-NG-NN-NG-NI-NI-NI-NI-N*-NS-N*
Os02g36850.1	PthXo1	2.76485333333333	oxygen evolving enhancer protein 3, identical, putative, expressed	membrane,thylakoid,plastid,cell,molecular_function,generation of precursor metabolites and energy,photosynthesis	NA	39	934	164	TGAACCTCACAATACCAAAAAAAAA	M:x|x||:x||x|||xxx||||x:x	-23.7147	2.0854402398281e-06	169	PXO99AME2	66	NN-HD-NI-HG-HD-NG-N*-HD-HD-NI-NG-NG-NI-HD-NG-NN-NG-NI-NI-NI-NI-N*-NS-N*
Os01g08090.1	PthXo1	1.18803666666667	flavonol-3-O-glycoside-7-O-glucosyltransferase 1, putative, expressed	transferase activity,cellular_component,biosynthetic process,cellular process,secondary metabolic process,metabolic process	NA	31	919	239	TAGAACTTCCATTACTACACACTAC	Mxx|x||:||||||||xx|x|x:::	-23.506	1.82630269523407e-06	148	PXO99	81	NN-HD-NI-HG-HD-NG-N*-HD-HD-NI-NG-NG-NI-HD-NG-NN-NG-NI-NI-NI-NI-N*-NS-N*
Os03g11330.1	PthXo1	1.16481666666667	glycosyl transferase 8 domain containing protein, putative, expressed	transferase activity,biosynthetic process,carbohydrate metabolic process	NA	91	1048	325	CGCTTCTTCCCCTCCTCAAAAATCC	m:|x|||:||xx|x||xx||||:x:	-24.8033	4.93595323036236e-06	400	PXO99AME2	-48	NN-HD-NI-HG-HD-NG-N*-HD-HD-NI-NG-NG-NI-HD-NG-NN-NG-NI-NI-NI-NI-N*-NS-N*
Os01g17050.1	PthXo1	1.14624	VQ domain containing protein, putative, expressed	nucleus,response to stress,response to abiotic stimulus,metabolic process,cellular process,protein binding	NA	18	850	163	TAAAGCTTCCATTATCTTAAAAAAC	Mxx|x||:||||||xxx|||||x::	-22.7675	1.08590971067972e-06	88	PXO99	150	NN-HD-NI-HG-HD-NG-N*-HD-HD-NI-NG-NG-NI-HD-NG-NN-NG-NI-NI-NI-NI-N*-NS-N*
Os09g11460.1	PthXo1	1.05714; 1.21129	AP2 domain containing protein, expressed	metabolic process,DNA binding,nucleus,biosynthetic process,nucleobase, nucleoside, nucleotide and nucleic acid metabolic process,sequence-specific DNA binding transcription factor activity,response to stress	NA	85	993	118	CGCCCCCACCATGACTGCAAAATTT	m:|xx|xx||||x|||:x||||:x:	-24.7052	4.55341685500927e-06	369	PXO99; PXO99AME2	7	NN-HD-NI-HG-HD-NG-N*-HD-HD-NI-NG-NG-NI-HD-NG-NN-NG-NI-NI-NI-NI-N*-NS-N*
Os06g04230.1	XOO2001_MAFF; Tal9e	2.40695; 2.05777	expressed protein	NA	NA	81	699	361	CGTCTCGCCCACGCGCGCGCGCGCA	m:xx||::x|:|:|:|:x:x:x:|x	-24.2237	9.74850762996565e-07; 1.19696865836287e-06	79; 97	MAFF311018; PXO99	301	NN-HD-NS-NG-HD-NN-N*-NI-HD-NS-HD-NN-HD-NN-HD-NN-NN-NN-NN-NN-NN-NN-HD-NG
Os04g41229.1	XOO2001_MAFF; Tal9e	2.38905; 1.61529333333333	helix-loop-helix DNA-binding domain containing protein, expressed	DNA binding,biosynthetic process,nucleobase, nucleoside, nucleotide and nucleic acid metabolic process,cytosol,sequence-specific DNA binding transcription factor activity	NA	3	1148	53	CGCAGCGCCCCCGCGCGGAGAAGCT	m:|:x|::x|x|:|:|::x:xx:||	-20.4627	2.46797661518118e-08; 3.70196492277177e-08	2; 3	MAFF311018; PXO99	-148	NN-HD-NS-NG-HD-NN-N*-NI-HD-NS-HD-NN-HD-NN-HD-NN-NN-NN-NN-NN-NN-NN-HD-NG
Os03g51760.1	XOO2001_MAFF; Tal9e	1.84702333333333; 1.99681666666667	OsFBX109 - F-box domain containing protein, expressed	NA	F-Box Domain Containing Proteins(F-box proteins)	21	801	240	TCCATAGTACGCGCGCGAGGGGAAG	Mx|:|x::||x|:|:|:x::::xxx	-22.5182	1.97438129214494e-07; 2.7147742766993e-07	16; 22	MAFF311018; PXO99	199	NN-HD-NS-NG-HD-NN-N*-NI-HD-NS-HD-NN-HD-NN-HD-NN-NN-NN-NN-NN-NN-NN-HD-NG
Os09g39020.1	XOO2001_MAFF	1.79789666666667	N-rich protein, putative, expressed	molecular_function,cellular_component,biological_process	NA	11	1013	1034	AACATCAAACCCGCGCGCGTGCGCT	mx|:||xx||x|:|:|:x:x:x:||	-21.7666	1.35738713834965e-07	11	MAFF311018	-13	NN-HD-NS-NG-HD-NN-N*-NI-HD-NS-HD-NN-HD-NN-HD-NN-NN-NN-NN-NN-NN-NN-HD-NG
Os02g53790.1; Os02g53790.2; Os02g53790.2	XOO2001_MAFF; XOO2001_MAFF; Tal9e	1.63109666666667; 1.80329333333333; 1.12686	adenylate kinase, putative, expressed	kinase activity,nucleobase, nucleoside, nucleotide and nucleic acid metabolic process,cytosol	NA	26; 27; 27	1172	242	CGCACGGCACACGCGCCCGGGGGAT	m:|:xx::||:|:|:|xx:::::x|	-22.6449	2.22117895366306e-07; 2.22117895366306e-07; 2.96157193821741e-07	18; 18; 24	MAFF311018; MAFF311018; PXO99	-172	NN-HD-NS-NG-HD-NN-N*-NI-HD-NS-HD-NN-HD-NN-HD-NN-NN-NN-NN-NN-NN-NN-HD-NG
Os03g12500.1	XOO2001_MAFF	1.34297333333333	cytochrome P450, putative, expressed	membrane,plastid,thylakoid,response to biotic stimulus,catalytic activity,oxygen binding,mitochondrion,cellular process,lipid metabolic process,response to stress,response to endogenous stimulus,biosynthetic process	NA	49	1067	170	TCTCTCCAACGCGCGCGCACGGGCT	Mxxx||xx||x|:|:|:xxx:::||	-23.3713	4.195560245808e-07	34	MAFF311018	-67	NN-HD-NS-NG-HD-NN-N*-NI-HD-NS-HD-NN-HD-NN-HD-NN-NN-NN-NN-NN-NN-NN-HD-NG
Os05g34680.2	XOO2001_MAFF	1.10673666666667	expressed protein	cell,molecular_function,biological_process	NA	45	1039	182	GGCCACCCACACGCACGCGGCGCCT	m:|xx|x:||:|:|x|:x::x:x||	-23.2197	3.82536375353083e-07	31	MAFF311018	-39	NN-HD-NS-NG-HD-NN-N*-NI-HD-NS-HD-NN-HD-NN-HD-NN-NN-NN-NN-NN-NN-NN-HD-NG
Os07g31250.1	XOO2001_MAFF	1.02129333333333	OsWAK69 - OsWAK receptor-like cytoplasmic kinase OsWAK-RLCK, expressed	cellular component organization,anatomical structure morphogenesis,cell growth,nucleotide binding,cellular homeostasis,protein modification process,biological_process,kinase activity,binding,carbohydrate metabolic process,plasma membrane	Oryza sativa Wall-associated Kinases	22	940	2596	TCCCTCGTCCCCGCGCGTCGGAGAT	Mx|x||::x|x|:|:|:xx::x:x|	-22.5635	1.97438129214494e-07	16	MAFF311018	60	NN-HD-NS-NG-HD-NN-N*-NI-HD-NS-HD-NN-HD-NN-HD-NN-NN-NN-NN-NN-NN-NN-HD-NG
Os06g46500.1	Avrpth3	3.0241925	monocopper oxidase, putative, expressed	membrane,cell wall,cellular_component,binding,metabolic process,catalytic activity	NA	7	729	409	TACATACTCCACCGCGTA	M:||||x||x|x|:x:|x	-13.0397	6.99365393388126e-07	57	XOC24h	271	NS-HD-NI-NG-NI-HG-NG-HD-NN-NI-NG-HD-NN-NS-NN-NG-NN
Os11g31190.1	Talc	6.43049333333333; 5.97128	nodulin MtN3 family protein, putative, expressed	cell,membrane,transport,cellular process,plasma membrane,transporter activity,biological_process	NA	1	909	296	CATGCATGTCAGCAGCTGGTCAT	m:|x|||:|||::|:||x::|x|	-16.0606	0	0	TALCDIFF	91	NS-NG-NS-HD-NI-NG-NN-NG-HD-NI-NN-N*-NI-NN-HD-NG-NI-NN-N*-HD-NN-NG
